# Supplementary material
Source: bioRxiv or medRxiv preprint supplement (https://www.biorxiv.org/highwire/filestream/112272/field_highwire_adjunct_files/0/280792-1.pdf)
Supplement: Supplementary file [file 280792-1.pdf]

# The contribution of mitochondrial metagenomics to large-scale data mining and phylogenetic analysis of Coleoptera

Benjamin Linard, Alex Crampton-Platt, Jérôme Moriniere, Martijn J.T.N. Timmermans, Carmelo Andujar, Paula Arribas, Kirsten E. Miller, Julia Lipecki, Emeline Favreau, Amie Hunter, Carola Gomez-Rodriguez, Christopher Barton, Ruie Nie, Conrad P.D.T. Gillett, Thijmen Breeschoten, Ladislav Bocak, Alfried P. Vogler

## Table of contents

|                                                                                   |    |
|-----------------------------------------------------------------------------------|----|
| <i>Neuropterida</i> outgroups                                                     | 2  |
| GenBank accessions related to MMG contigs                                         | 3  |
| Illumina reads QC and mitochondrial loci selection:                               | 4  |
| Labelling of the tree tips                                                        | 5  |
| Taxonomic codes: detailed key file                                                | 6  |
| Terminals based on both NCBI and MMG loci (“MERGED” keyword)                      | 7  |
| Manual correction of erroneous sequences                                          | 20 |
| NCBI extraction and Blast threshold                                               | 21 |
| Likelihood of the 20 tree searches based on the NCBI+MMG min3loci 1RY_3Del matrix | 22 |
| Annotation of NCBI+MMG min2loci 1RY_3Del tree                                     | 23 |
| References                                                                        | 32 |

## ***Neuropterida* outgroups**

A set of 8 complete *Neuropterida* mitochondrial genomes, from 8 different families were used as outgroups.

| <b>Loci and Taxonomic code</b>      | <b>Species</b>                        | <b>GenBank identifier</b> |
|-------------------------------------|---------------------------------------|---------------------------|
| XXXXXXXXXXXXXXXXXXXX---_NO4Th7lan   | <i>Thyridosmylus langii</i>           | NC_021415                 |
| XXXXXXXXXXXXXXXXXXXX---_NMa4Di7bis  | <i>Ditaxis biseriata</i>              | NC_013257                 |
| XXXXXXXXXXXXXXXXXXXX---_NCh4Chr7nip | <i>Chrysoperla nipponensis</i>        | NC_015093                 |
| XXXXXXXXXXXXXXXXXXXX---_NPo4Po7pun  | <i>Polystoechotes punctatus</i>       | NC_011278                 |
| XXXXXXXXXXXXXXXXXXXX---_NR4Ra7xiz   | <i>Rapisma xizangense</i>             | NC_023362                 |
| XXXXXXXXXXXXXXXXXXXX---_NNy4Ny7myr  | <i>Nymphes myrmeleonoides</i>         | NC_024825                 |
| XXXXXXXXXXXXXXXXXXXX---_NMy4My7imm  | <i>Myrmeleon immanis</i>              | NC_024826                 |
| XXXXXXXXXXXXXXXXXXXX---_NA4As7app   | <i>Ascaloptynx<br/>appendiculatus</i> | NC_011277                 |

## GenBank accessions related to MMG contigs

| Dataset Identifier             | GenBank codes (# per subset)                                                                                                                          | Publication                   |
|--------------------------------|-------------------------------------------------------------------------------------------------------------------------------------------------------|-------------------------------|
| <b>B480</b>                    | Submitted to NCBI                                                                                                                                     | Crampton-Platt et al., 2015   |
| <b>BIUK</b>                    | Submitted to NCBI                                                                                                                                     | Crampton-Platt, PhD UCL 2015  |
| <b>MT1</b>                     | HM486073<br>HQ232800-HQ232827 (27)                                                                                                                    | Timmermans et al., 2010       |
| <b>MT2</b>                     | JX220988-JX221000 (13)<br>JX313663-JX313692 (29)<br>JX412724-JX412859 (127)<br>JN039360<br>JN163945-JN163970 (25)<br>JQ034414<br>JQ034416<br>JQ034419 | Timmermans et al., 2016       |
| <b>Curc</b>                    | Submitted to NCBI                                                                                                                                     | Gillett et al., 2014          |
| <b>Germany Barcode-of-Life</b> | KX087231 - KX087368 (139)                                                                                                                             | Present study                 |
| <b>Chryso</b>                  | KX943331-KX943509 (179)                                                                                                                               | Gómez-Rodríguez, et al., 2015 |
| <b>Staphylinidae</b>           | KT780620-KT780701 (82)                                                                                                                                | Present study                 |
| <b>Soil</b>                    | Submitted to NCBI                                                                                                                                     | Andújar et al., 2015          |
| <b>Ethanol</b>                 | KT876876-KT876915 (42)                                                                                                                                | Linard et al., 2016           |
| <b>M2015</b>                   | KX035130-KX035162 (33)                                                                                                                                | Present study                 |
| <b>Scarabaeidae</b>            | KU39447-KU739446 (80)                                                                                                                                 | Breeschoten et al., 2016      |
| <b>ChrysoT</b>                 | KX943331-KX943509 (179)                                                                                                                               | Rui et al., submitted         |
| <b>French Guyana</b>           | KT696173-KT696273 (101)                                                                                                                               | Present study                 |
| <b>Panama</b>                  | MG193322-MG193541 (220)                                                                                                                               | Present study                 |
| <b>Scolytinae</b>              | KX035130-KX035226 (64)                                                                                                                                | Miller et al., unpublished    |
| <b>Cocci</b>                   | KJ778881-KJ77883 (3)<br>KJ778886<br>KJ778888-KJ778889 (2)                                                                                             | Paula et al., 2014            |

## Illumina reads QC and mitochondrial loci selection:

1. Trimmomatic was used to discard eventual Illumina adapter left in the metagenomes:  

```
java -jar trimmomatic-0.33.jar PE -threads 4 -phred33 -trimlog MyLibraryTrimlog  
MyLibrary_R1.fq MyLibrary_R2.fq MyLibrary_R1.paired.fq MyLibrary_R1.unpaired.fq  
MyLibrary_R2.paired.fq MyLibrary_R2.unpaired.fq  
ILLUMINACLIP:MyLibrary_Truseq_trimseqs.fa:2:30:10
```
2. Prinseq was used to trim reads of low quality with:  

```
perl prinseq-lite.pl -verbose -fastq MyLibrary.fq -log -out_format 3 -out_good  
MyLibrary.QC -min_len 150 -min_qual_mean 25 -ns_max_n 0 -trim_qual_right 20
```
3. Mitochondrial reads were filtered with the help of blastn. First the quality controlled metagenomes were blasted to a custom database of a hundred of Coleopteran mitochondrial genomes with this command:  

```
blastn -db MitogenomeReferences.fa -query MyLibrary.paired.fq -out  
MyLibrary.paired.blastn -task blastn -evalue 1e-5 -max_target_seqs 1 -outfmt 6 -dust no
```
4. All reads matching this database at an Evalue inferior to  $1e-3$  and with at least 70% of identity were filtered out with a custom script to form a putative mitochondrial reads subset.
5. Following these quality control and filtering, the read subset was submitted to IDBA assembly with:  

```
idba_ub --mink 80 --maxk 250or300 --min_contig 1000 --similar 0.98
```
6. All contigs <5kb were discarded (short contigs cannot be identified because they don't hold the cox1 or cyt b regions)
7. All remaining contigs were submitted to the pipeline of Bocak et al., 2014.

# Labelling of the tree tips

The tips labels contain 3 groups (see figure below), the locus code, the taxonomic code, the Linnaean binomial and metadata related to the mitochondrial contig if the tip is partially or fully based on loci extracted from the MMG dataset.

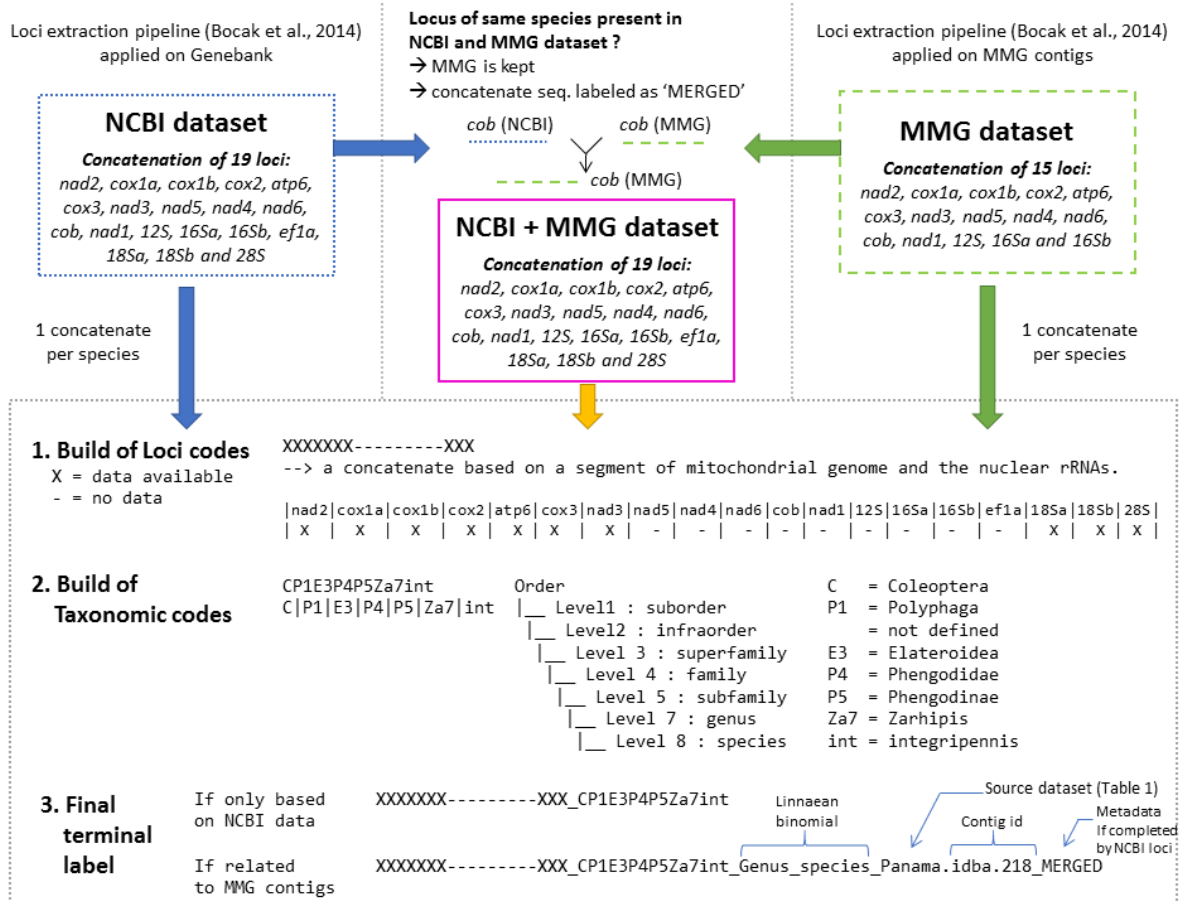

- **Locus code:** The ordered X/- symbols help the reader to determine which locus supports a particular tip. Typically, an X on the first 15 positions means full mitochondria, while the 4 last positions represent the nuclear loci used in the analysis. The example in the figure below describes a species supported by a first half of mitochondrial genome (loci *nad2* to *nad3*) and 3 nuclear loci.
- **Taxonomic code:** This code is similar to the one used in Bocak et al, 2014. Eight taxonomic orders are associated to combinations of 1 to 3 letters and a number. The numbers represent 8 taxonomical levels: 1=suborder, 2=infraorder, 3=superfamily, 4=family, 5=subfamily, 7=genus, 8=species. A tip may or may not be associated to each of these levels: see the example below where the infraorder of *Zarhipis integripennis* is undefined (level 3 absent). A tip may also be associated to only high taxonomic ranks if the sequence was extracted from poorly identified specimens. Example: a taxonomic code limited to "CP1E3" corresponds to an *Elateroidea sp.* (specimen identified at superfamily level).
- **Linnaean binomial:** The genus and species in plain letter in most cases. When the sequence corresponds to a specimen identified at higher taxonomic levels, this higher level is used

instead. Example: *Elateroidea sp.*

- Finally, if the tip is related to MMG sequences, the study and the contig from which were built at least 1 locus are reported as **supplementary keywords**. These metadata are labelled using the following set of keywords :
  - o **NCBI**: indicates that the tip is fully based on NCBI loci.
  - o **MMG**: indicates that the tip is fully based on a MMG contig.
  - o **MERGED**: indicates that at least one locus supporting the tip was available both from the NCBI and MMG datasets. In such case the MMG locus was kept (ensuring coherence of the full mitochondrial contig).
  - o **ANNOT\_FROM\_BARCODE**: is related to MMG contigs for which study-related, NCBI or BOLD barcodes allowed DNA-based identification of the genus or species (match >99.8%, sequenced assigned to species, match >99% identity, sequenced assigned to genus level).
  - o **ANNOT\_FROM\_TREE**; is related to MMG contigs for which no matching barcodes or other reference sequences could be discovered. In such case, the superfamily to which was placed the sequence (through tree reconstruction) was used as a high-level taxonomic identification.

## Taxonomic codes: detailed key file

All taxonomic codes and their detailed description can be found in Suppl. File S2 (excel table).

# Terminals based on both NCBI and MMG loci (“MERGED” keyword)

(Ordered taxonomically via the column “NCBI original taxonomic code)

(Use Suppl. File S2 to get taxonomic code details)

| NCBI original loci code | NCBI original taxonomic code | MMG original loci code | MMG original taxonomic code                                  | MERGED loci code      | MERGED label                                                        |
|-------------------------|------------------------------|------------------------|--------------------------------------------------------------|-----------------------|---------------------------------------------------------------------|
| -XX-----                | CA1C3C4B6Br7cre              | XXXXXXXXXXXXXX         | CA1C3C4B6Br7cre_Brachinus_crepitans_JX412826                 | XXXXXXXXXXXXXX        | CA1C3C4B6Br7cre_Brachinus_crepitans_JX412826_MERGED                 |
| --X-----X-XX--X-        | CA1C3C4C5C6Hab7cap           | XXXXXXXXXXXXXX         | CA1C3C4C5C6Hab7cap_Habrodera_capensis_JX412824               | XXXXXXXXXXXXXX-XX-    | CA1C3C4C5C6Hab7cap_Habrodera_capensis_JX412824_MERGED               |
| -XX---X--X-XXX-XXX      | CA1C3C4Ca6Ca7nem             | -XXXXXXXXXXXXXX        | CA1C3C4Ca6Ca7nem_Carabus_nemoralis_BIUK.idba.47              | -XXXXXXXXXXXXXX-XXX   | CA1C3C4Ca6Ca7nem_Carabus_nemoralis_BIUK.idba.47_MERGED              |
| -XX---X--X-XXX-X-X      | CA1C3C4Ca6Ca7prob            | XXXXX-----             | CA1C3C4Ca6Ca7prob_Carabus_problematicus_BIUK.idba.82         | XXXXX--X--X-XXX-X-X   | CA1C3C4Ca6Ca7prob_Carabus_problematicus_BIUK.idba.82_MERGED         |
| -X-----X-XXX-XXX        | CA1C3C4Cy6Cy7car             | XXXXXXXXXXXXXX         | CA1C3C4Cy6Cy7car_Cychnus_caraboides_BIUK.idba.13             | XXXXXXXXXXXXXX-XXX    | CA1C3C4Cy6Cy7car_Cychnus_caraboides_BIUK.idba.13_MERGED             |
| -X-----XX-              | CA1C3C4E5E6B17mul            | XXXXXXXXXX             | CA1C3C4E5E6B17mul_Blethisa_multipunctata_ameie.idba.101      | XXXXXXXXXX-----XX-    | CA1C3C4E5E6B17mul_Blethisa_multipunctata_ameie.idba.101_MERGED      |
| -XX-----X--XX-          | CA1C3C4E5E6E17cup            | XXXXXXXXXXXXXX         | CA1C3C4E5E6E17cup_Elaphrus_cupreus_ameie.idba.30             | XXXXXXXXXXXXXX--XX-   | CA1C3C4E5E6E17cup_Elaphrus_cupreus_ameie.idba.30_MERGED             |
| -XXX--X-----            | CA1C3C4H5H6An7poe            | XXXXXX-----            | CA1C3C4H5H6An7poe_Anisodactylus_poeciloides_ameie.idba.172   | XXXXXX-X-----         | CA1C3C4H5H6An7poe_Anisodactylus_poeciloides_ameie.idba.172_MERGED   |
| -XX-----                | CA1C3C4H5H6Br7ruf            | XXXXXXXXXX             | CA1C3C4H5H6Br7ruf_Bradycellus_ruficollis_ameie.idba.124      | XXXXXXXXXX-----       | CA1C3C4H5H6Br7ruf_Bradycellus_ruficollis_ameie.idba.124_MERGED      |
| -XX-----                | CA1C3C4H5H6Cry7ten           | XX-----                | CA1C3C4H5H6Cry7ten_Cryptophonus_tenebrosus_ameie.idba.193    | XX-----               | CA1C3C4H5H6Cry7ten_Cryptophonus_tenebrosus_ameie.idba.193_MERGED    |
| -XX-----                | CA1C3C4H5H6Op7ard            | -XXXXXXXXXX            | CA1C3C4H5H6Op7ard_Ophonus_ardosiacus_Soil.idba.8a            | -XXXXXXXXXX-----      | CA1C3C4H5H6Op7ard_Ophonus_ardosiacus_Soil.idba.8a_MERGED            |
| -X-----                 | CA1C3C4H5Le6Le7chl           | XXXXXXXXXXXXXX         | CA1C3C4H5Le6Le7chl_Lebia_chlorocephala_ameie.idba.39         | XXXXXXXXXXXXXX        | CA1C3C4H5Le6Le7chl_Lebia_chlorocephala_ameie.idba.39_MERGED         |
| -XX-----X-              | CA1C3C4H5Le6Mic7min          | XXXXXXXXXXXXXX         | CA1C3C4H5Le6Mic7min_Microlestes_minutulus_ameie.idba.19      | XXXXXXXXXXXXXX-----X- | CA1C3C4H5Le6Mic7min_Microlestes_minutulus_ameie.idba.19_MERGED      |
| -XX-----                | CA1C3C4H5Le6Sy7fov           | XXXXXXXXXX             | CA1C3C4H5Le6Sy7fov_Syntomus_foveatus_Soil.idba.104           | XXXXXXXXXX-----       | CA1C3C4H5Le6Sy7fov_Syntomus_foveatus_Soil.idba.104_MERGED           |
| -XXX--X-----XX-XX-      | CA1C3C4H5P6Ab7par            | XXXXXXXXXXXXXX         | CA1C3C4H5P6Ab7par_Abax_parallelepipedus_2VGB.idba.3          | XXXXXXXXXXXXXX-XX-    | CA1C3C4H5P6Ab7par_Abax_parallelepipedus_2VGB.idba.3_MERGED          |
| -X-----XX-              | CA1C3C4H5P6Ab7para           | -XXXXXX                | CA1C3C4H5P6Ab7para_Abax_parallelus_ameie.idba.169            | -XXXXXX-----XX-       | CA1C3C4H5P6Ab7para_Abax_parallelus_ameie.idba.169_MERGED            |
| -XX-----                | CA1C3C4H5P6Pt7mad            | -XXXXXXXXXX            | CA1C3C4H5P6Pt7mad_Pterostichus_madidus_BIUK.idba.54          | -XXXXXXXXXX-----      | CA1C3C4H5P6Pt7mad_Pterostichus_madidus_BIUK.idba.54_MERGED          |
| -XX-----XX-             | CA1C3C4H5P6Pt7nig            | XXXXXXXXXXXXXX         | CA1C3C4H5P6Pt7nig_Pterostichus_niger_2VGB.idba.5             | XXXXXXXXXXXXXX-XX-    | CA1C3C4H5P6Pt7nig_Pterostichus_niger_2VGB.idba.5_MERGED             |
| -XXX-----XX-            | CA1C3C4H5P6St7pum            | XXXXXXXXXXXXXX         | CA1C3C4H5P6St7pum_Stomis_pumicatus_2VGB.idba.4               | XXXXXXXXXXXXXX-XX-    | CA1C3C4H5P6St7pum_Stomis_pumicatus_2VGB.idba.4_MERGED               |
| -XX-----                | CA1C3C4H5Z6Am7com            | XXXXXXXXXXXXXX         | CA1C3C4H5Z6Am7com_Amara_communis_677553_idba_contig.5        | XXXXXXXXXXXXXX        | CA1C3C4H5Z6Am7com_Amara_communis_677553_idba_contig.5_MERGED        |
| -XX-----X-XXX-          | CA1C3C4L5L6Lo7pil            | XXXXXXXXXXXXXX         | CA1C3C4L5L6Lo7pil_Loricera_pilicornis_BIUK.idba.49           | XXXXXXXXXXXXX-X-XXX-  | CA1C3C4L5L6Lo7pil_Loricera_pilicornis_BIUK.idba.49_MERGED           |
| -XX-----XX-XX-          | CA1C3C4Ne6Ne7bre             | XXXXXXXXXXXXXX         | CA1C3C4Ne6Ne7bre_Nebria_brevicollis_2VGB.idba.0              | XXXXXXXXXXXXXX-XX-    | CA1C3C4Ne6Ne7bre_Nebria_brevicollis_2VGB.idba.0_MERGED              |
| -XXX-----XXX-           | CA1C3C4P15P6Ag7mue           | -XXXXXXXXXX            | CA1C3C4P15P6Ag7mue_Agonum_muelleri_JX412835                  | -XXXXXXXXXX--XXX-     | CA1C3C4P15P6Ag7mue_Agonum_muelleri_JX412835_MERGED                  |
| -XX-----                | CA1C3C4P15P6Ox7obs           | XXXXXXXXXXXXXX         | CA1C3C4P15P6Ox7obs_Oxypselaphus_obscurus_BIUK.idba.26        | XXXXXXXXXXXXXX        | CA1C3C4P15P6Ox7obs_Oxypselaphus_obscurus_BIUK.idba.26_MERGED        |
| -XXX-----X-             | CA1C3C4P15S6Ca7me1           | XXXX--XXXX             | CA1C3C4P15S6Ca7me1_Calathus_melanocephalus_2VGB.idba.15      | XXXX--XXXX            | CA1C3C4P15S6Ca7me1_Calathus_melanocephalus_2VGB.idba.15_MERGED      |
| -XXXX-----XX-           | CA1C3C4Pr5P6Pr7cra           | XXXXXXXXXXXXXX         | CA1C3C4Pr5P6Pr7cra_Promecognathus_crassus_JX313665           | XXXXXXXXXXXXXX--XX-   | CA1C3C4Pr5P6Pr7cra_Promecognathus_crassus_JX313665_MERGED           |
| -X-----XX-              | CA1C3C4T5B6Be7lae            | XXXXXXXXXXXXXX         | CA1C3C4T5B6Be7lae_Bembidion_laetum_Soil.idba.40              | XXXXXXXXXXXXXX-XX-    | CA1C3C4T5B6Be7lae_Bembidion_laetum_Soil.idba.40_MERGED              |
| -X-----XX-              | CA1C3C4T5B6Be7var            | XXXXXXXXXXXXXX         | CA1C3C4T5B6Be7var_Bembidion_varium_ameie.idba.56             | XXXXXXXXXXXXXX--XX-   | CA1C3C4T5B6Be7var_Bembidion_varium_ameie.idba.56_MERGED             |
| -X-----XX-              | CA1C3C4T5B6Ta7nan            | XXXXXXXXXXXXXX         | CA1C3C4T5B6Ta7nan_Tachyta_nana_832958_idba_contig.6          | XXXXXXXXXXXXXX-XX-    | CA1C3C4T5B6Ta7nan_Tachyta_nana_832958_idba_contig.6_MERGED          |
| -X-----                 | CA1C3C4T5Po6Po7iri           | XXXXXXXXXXXXXX         | CA1C3C4T5Po6Po7iri_Pogonus_iridipennis_ameie.idba.48         | XXXXXXXXXXXXXX        | CA1C3C4T5Po6Po7iri_Pogonus_iridipennis_ameie.idba.48_MERGED         |
| -XXX-----XX-X-          | CA1C3C4T5T6Tr7obt            | XXXXXXXXXXXXXX         | CA1C3C4T5T6Tr7obt_Trechus_obtusus_Soil.idba.42               | XXXXXXXXXXXXXX-X-     | CA1C3C4T5T6Tr7obt_Trechus_obtusus_Soil.idba.42_MERGED               |
| XXXXXXXXXX-XXX-XX-      | CA1C3T4Tr7hol                | XXXXXXXXXXXXXX         | CA1C3T4Tr7hol_Trachypachus_holmbergi_NC_011329               | XXXXXXXXXXXXXX-XX-    | CA1C3T4Tr7hol_Trachypachus_holmbergi_NC_011329_MERGED               |
| -X-----X-XXX-XX-        | CA1D3A4Am7ins                | XX-----                | CA1D3A4Am7ins_Amphizoia_insolens_799022_idba_contig.85       | XX-----X-XXX-XX-      | CA1D3A4Am7ins_Amphizoia_insolens_799022_idba_contig.85_MERGED       |
| XXXXXXXXXXXXXX-XX-      | CA1D3As4As7nio               | XXXXXXXXXXXXXX         | CA1D3As4As7nio_Aspidytes_niobe_NC_012139                     | XXXXXXXXXXXXXX-XX-    | CA1D3As4As7nio_Aspidytes_niobe_NC_012139_MERGED                     |
| -XX-----XX-             | CA1D3D4A5A6Ag7uli            | XXXXXXXXXXXXXX         | CA1D3D4A5A6Ag7uli_Agabus_uliginosus_ameie.idba.68            | XXXXXXXXXXXXXX        | CA1D3D4A5A6Ag7uli_Agabus_uliginosus_ameie.idba.68_MERGED            |
| -XX-----X-XXXX-         | CA1D3D4C5C6Co7fus            | XXXXXXXXXXXXXX         | CA1D3D4C5C6Co7fus_Colymbetes_fuscus_1VWB.idba.16             | XXXXXXXXXXXXXX        | CA1D3D4C5C6Co7fus_Colymbetes_fuscus_1VWB.idba.16_MERGED             |
| -X-----X-XX-            | CA1D3D4Co5C6Li7hae           | XXXXXXXXXXXXXX         | CA1D3D4Co5C6Li7hae_Liopterus_haemorrhoidalis_1VWB.idba.11    | XXXXXXXXXXXXXX-XX-    | CA1D3D4Co5C6Li7hae_Liopterus_haemorrhoidalis_1VWB.idba.11_MERGED    |
| -XXX-----X--XX-         | CA1D3D4D5Ac6Ac7sul           | XXXXXXXXXXXXXX         | CA1D3D4D5Ac6Ac7sul_Acilius_sulcatus_1VWB.idba.3              | XXXXXXXXXXXXXX-XX-    | CA1D3D4D5Ac6Ac7sul_Acilius_sulcatus_1VWB.idba.3_MERGED              |
| -XX-----XX-XX-          | CA1D3D4D5C6Cy7lat            | XXXXXXXXXX             | CA1D3D4D5C6Cy7lat_Cybister_lateralimarginalis_ameie.idba.131 | XXXXXXXXXX--XX-XX-    | CA1D3D4D5C6Cy7lat_Cybister_lateralimarginalis_ameie.idba.131_MERGED |
| -X-----XX----           | CA1D3D4H5H6Hy7dis            | XXXXXXXXXX             | CA1D3D4H5H6Hy7dis_Hydropsorus_discretus_1VWB.idba.14         | XXXXXXXXXX--XX----    | CA1D3D4H5H6Hy7dis_Hydropsorus_discretus_1VWB.idba.14_MERGED         |
| -XX-----X--XX-          | CA1D3D4H5H6Hy7ery            | -----XXXXXXXX          | CA1D3D4H5H6Hy7ery_Hydropsorus_erythrocephalus_1VWB.idba.20   | -XX-----XXXXXXXX-XX-  | CA1D3D4H5H6Hy7ery_Hydropsorus_erythrocephalus_1VWB.idba.20_MERGED   |
| -XX-----XX----          | CA1D3D4H5H6Hy7gyl            | XXXXXXXXXXXXXX         | CA1D3D4H5H6Hy7gyl_Hydropsorus_gyllenhalii_1VWB.idba.4        | XXXXXXXXXXXXXX        | CA1D3D4H5H6Hy7gyl_Hydropsorus_gyllenhalii_1VWB.idba.4_MERGED        |
| -XXX-----XX-X-          | CA1D3D4H5H6Hy7obs            | XXXXXXXXXXXXXX         | CA1D3D4H5H6Hy7obs_Hydropsorus_obscurus_1VWB.idba.1           | XXXXXXXXXXXXXX-X-     | CA1D3D4H5H6Hy7obs_Hydropsorus_obscurus_1VWB.idba.1_MERGED           |

|                    |                     |                       |                                                            |                           |                                                                   |
|--------------------|---------------------|-----------------------|------------------------------------------------------------|---------------------------|-------------------------------------------------------------------|
| -XX-----XX-XX-     | CA1D3D4H5H6Hy7pal   | -----XXXXXX-----      | CA1D3D4H5H6Hy7pal_Hydroporus_palustris_JX313670            | -XX-XXXXXXXXXX---         | CA1D3D4H5H6Hy7pal_Hydroporus_palustris_JX313670_MERGED            |
| -XX-----XX-XX-     | CA1D3D4H5H6Hy7pla   | XXXXXXXXXXXXXXXXXXXX  | CA1D3D4H5H6Hy7pla_Hydroporus_planus_1VWB.idba.2            | XXXXXXXXXXXXXXXXXXXX      | CA1D3D4H5H6Hy7pla_Hydroporus_planus_1VWB.idba.2_MERGED            |
| -XX-----X--XX-     | CA1D3D4H5Hyg6Hy7con | XXXXXXXXXXXXXXXXXXXX  | CA1D3D4H5Hyg6Hy7con_Hygrotytus_confluens_1VWB.idba.7       | XXXXXXXXXXXXXXXXXXXX-XX-  | CA1D3D4H5Hyg6Hy7con_Hygrotytus_confluens_1VWB.idba.7_MERGED       |
| -XX-----XX-XX-     | CA1D3D4H5Hyg6Hy7ina | XXXXXXXXXXXXXXXXXXXX  | CA1D3D4H5Hyg6Hy7ina_Hygrotytus_inaequalis_1VWB.idba.10     | XXXXXXXXXXXXXXXXXXXX-XX-  | CA1D3D4H5Hyg6Hy7ina_Hygrotytus_inaequalis_1VWB.idba.10_MERGED     |
| --X-----XX-----    | CA1D3D4H5Hyg6Hy7nig | XXXXXXXXXXXXXXXXXXXX  | CA1D3D4H5Hyg6Hy7nig_Hygrotytus_nigrolineatus_ameie.idba.11 | XXXXXXXXXXXXXXXXXXXX----- | CA1D3D4H5Hyg6Hy7nig_Hygrotytus_nigrolineatus_ameie.idba.11_MERGED |
| -XX-----X-XX-XX-   | CA1D3D4L5L6La7poe   | XXXXXXXXXXXXXXXXXXXX  | CA1D3D4L5L6La7poe_Laccophilus_poecilus_ameie.idba.8        | XXXXXXXXXXXXXXXXXXXX-XX-  | CA1D3D4L5L6La7poe_Laccophilus_poecilus_ameie.idba.8_MERGED        |
| -XX-----X-X-XX-    | CA1D3H4Hy7her       | XXXXXXXXXXXXXXXXXXXX  | CA1D3H4Hy7her_Hygrobia_hermanni_1VWB.idba.13               | XXXXXXXXXXXXXXXXXXXX-XX-  | CA1D3H4Hy7her_Hygrobia_hermanni_1VWB.idba.13_MERGED               |
| --X-----X-XX-XX-   | CA1D3M4Me7phy       | --XXXXXXXXXXXX-----   | CA1D3M4Me7phy_Meru_phyllisae_JX313691                      | --XXXXXXXXXXXX-XX-        | CA1D3M4Me7phy_Meru_phyllisae_JX313691_MERGED                      |
| -XX-----X-XX-XX-   | CA1D3N4Not7cla      | XXXXXXXXXXXXXXXXXXXX  | CA1D3N4Not7cla_Noterus_clavicornis_1VWB.idba.5             | XXXXXXXXXXXXXXXXXXXX-XX-  | CA1D3N4Not7cla_Noterus_clavicornis_1VWB.idba.5_MERGED             |
| XXXXXXXXXXXXX-X-X- | CA1G3G4Ma7obl       | XXXXXXXXXXXXXXXXXXXX  | CA1G3G4Ma7obl_Macrogyrus_oblongus_NC_013249                | XXXXXXXXXXXXXXXXXXXX---   | CA1G3G4Ma7obl_Macrogyrus_oblongus_NC_013249_MERGED                |
| -X-----X-----      | CA1H3H4Ha7f1a       | XXXXXXXXXXXXXXXXXXXX  | CA1H3H4Ha7f1a_Haliplus_flavicollis_JX313677                | XXXXXXXXXXXXXXXXXXXX----- | CA1H3H4Ha7f1a_Haliplus_flavicollis_JX313677_MERGED                |
| -XX-----X-X-X-XX-  | CA1H3H4Ha7imm       | -XXXXXXXXXXXX-----    | CA1H3H4Ha7imm_Haliplus_immaculatus_1VWB.idba.22            | -XXXXXXXXXXXX-----        | CA1H3H4Ha7imm_Haliplus_immaculatus_1VWB.idba.22_MERGED            |
| -XX-----X-X-X-XX-  | CA1H3H4Ha7lin       | XXXXXXXXXXXXXXXXXXXX  | CA1H3H4Ha7lin_Haliplus_lineatocollis_1VWB.idba.6           | XXXXXXXXXXXXXXXXXXXX-XX-  | CA1H3H4Ha7lin_Haliplus_lineatocollis_1VWB.idba.6_MERGED           |
| -X-----X-----      | CA1H3H4Ha7sib       | XXXXXXXXXXXXXXXXXXXX  | CA1H3H4Ha7sib_Haliplus_sibiricus_ameie.idba.110            | XXXXXXXXXXXXXXXXXXXX----- | CA1H3H4Ha7sib_Haliplus_sibiricus_ameie.idba.110_MERGED            |
| CA1H3H4Pe7qua      | CA1H3H4Pe7qua       | --XXXXXXXXXXXX-----   | CA1H3H4Pe7qua_Peltoodytes_quadratius_JX313685              | --XXXXXXXXXXXX-----       | CA1H3H4Pe7qua_Peltoodytes_quadratius_JX313685_MERGED              |
| -X-----XX-XX-      | CAr1C4Pr7ser        | --XXXXXXXXXXXX-----   | CAr1C4Pr7ser_Priacma_serrata_JX412806                      | -X-XXXXXXXXXXXX-XX-       | CAr1C4Pr7ser_Priacma_serrata_JX412806_MERGED                      |
| XXXXXXXXXXXXX-X-   | CAr1O4Te7bru        | XXXXXXXXXXXXXXXXXXXX  | CAr1O4Te7bru_Tetraphalerus_bruchi_NC_011328                | XXXXXXXXXXXXXXXXXXXX---   | CAr1O4Te7bru_Tetraphalerus_bruchi_NC_011328_MERGED                |
| XXXXXXXXXXXXX-X-   | CM1H4Hy7gra         | XXXXXXXXXXXXXXXXXXXX  | CM1H4Hy7gra_Hydroscapha_granulum_NC_012144                 | XXXXXXXXXXXXXXXXXXXX---   | CM1H4Hy7gra_Hydroscapha_granulum_NC_012144_MERGED                 |
| -X-----X-XX-XX-    | CM1T4In7mad         | XXXXXXXXXXXXXXXXXXXX  | CM1T4In7mad_Incoltorrida_madagassica_670733_idba_contig_2  | XXXXXXXXXXXXXXXXXXXX-XX-  | CM1T4In7mad_Incoltorrida_madagassica_670733_idba_contig_2_MERGED  |
| -X-----X-----      | CP1B3B4A5Ag7big     | --XXXXXXXXXXXX-----   | CP1B3B4A5Ag7big_Agrilus_biguttatus_JX412786                | -X-XXXXXXXXXXXX-XX-       | CP1B3B4A5Ag7big_Agrilus_biguttatus_JX412786_MERGED                |
| -X-----X-XX-XX-    | CP1B3B4A5Tr7tro     | XXXXXXXXXXXXXXXXXXXX  | CP1B3B4A5Tr7tro_Trachys_trogodytiformis_ameie.idba.40      | XXXXXXXXXXXXX-X-XX-       | CP1B3B4A5Tr7tro_Trachys_trogodytiformis_ameie.idba.40_MERGED      |
| XX-XXXXXXXXXX-X-   | CP1B3B4C5Ch7ful     | XXXXXXXXXXXXXXXXXXXX  | CP1B3B4C5Ch7ful_Chrysochroa_fulgidissima_NC_012765         | XXXXXXXXXXXXXXXXXXXX---   | CP1B3B4C5Ch7ful_Chrysochroa_fulgidissima_NC_012765_MERGED         |
| -X-----X-----      | CP1B3B4Ch5Pe7lug    | --XXXXXXXXXXXX-----   | CP1B3B4Ch5Pe7lug_Perotis_lugubris_JX412762                 | -X-XXXXXXXXXXXX-----      | CP1B3B4Ch5Pe7lug_Perotis_lugubris_JX412762_MERGED                 |
| -X-----X-----      | CP1B03A4Ga7lae      | XXXXXXXXXXXXXXXXXXXX  | CP1B03A4Ga7lae_Gastrallus_laevigatus_ameie.idba.78         | XXXXXXXXXXXXXXXXXXXX----- | CP1B03A4Ga7lae_Gastrallus_laevigatus_ameie.idba.78_MERGED         |
| -X-----X-----      | CP1B03A4La7red      | XXXXXXXXXXXXXXXXXXXX  | CP1B03A4La7red_Lasioderma_redtenbacheri_ameie.idba.91      | XXXXXXXXXXXXXXXXXXXX----- | CP1B03A4La7red_Lasioderma_redtenbacheri_ameie.idba.91_MERGED      |
| XXXXXXXXXXXXX-X-X- | CP1B03B4B5Ap7for    | XXXXXXXXXXXXXXXXXXXX  | CP1B03B4B5Ap7for_Apatides_fortis_NC_013582                 | XXXXXXXXXXXXXXXXXXXX---   | CP1B03B4B5Ap7for_Apatides_fortis_NC_013582_MERGED                 |
| -X-----X-----      | CP1B03B4D5D17min    | XXXXXXXXXXXXXXXXXXXX  | CP1B03B4D5D17min_Dinoderus_minutus_ameie.idba.76           | XXXXXXXXXXXXXXXXXXXX----- | CP1B03B4D5D17min_Dinoderus_minutus_ameie.idba.76_MERGED           |
| -XX-----X-----XX-  | CP1B03D4An7ver      | XXXXXXXXXXXXXXXXXXXX  | CP1B03D4An7ver_Anthrenus_verbasci_ameie.idba.111           | XXXXXXXXXXXXX-X-XX-       | CP1B03D4An7ver_Anthrenus_verbasci_ameie.idba.111_MERGED           |
| -XX-----XX-XXX     | CP1B03D4De7per      | --XXXXXXXXXXXX-----   | CP1B03D4De7per_Dermestes_peruvianus_JX313683               | -XXXXXXXXXXXX-XXX         | CP1B03D4De7per_Dermestes_peruvianus_JX313683_MERGED               |
| -X-----X-----      | CP1B03D4Tr7hir      | --XXXXXXXXXXXX-----   | CP1B03D4Tr7hir_Trinodes_hirtus_JX313664                    | -XXXXXXXXXXXX-XX-         | CP1B03D4Tr7hir_Trinodes_hirtus_JX313664_MERGED                    |
| -X-----X-XX-XX-    | CP1B03N4No7fas      | XXXXXXXXXXXXXXXXXXXX  | CP1B03N4No7fas_Nosodendron_fasciculare_ameie.idba.85       | XXXXXXXXXXXXXXXXXXXX---   | CP1B03N4No7fas_Nosodendron_fasciculare_ameie.idba.85_MERGED       |
| -X-----X-----      | CP1B03P4Nip7hol     | XXXXXX-----           | CP1B03P4Nip7hol_Niptus_hololeucus_ameie.idba.138           | XXXXXX-----               | CP1B03P4Nip7hol_Niptus_hololeucus_ameie.idba.138_MERGED           |
| -X-----X-----      | CP1B03P4Pt7ruf      | --XXXXXXXXXXXX-----   | CP1B03P4Pt7ruf_Ptinus_rufipes_HQ232819                     | -XXXXXXXXXXXX-----        | CP1B03P4Pt7ruf_Ptinus_rufipes_HQ232819_MERGED                     |
| -X-----X-----      | CP1B3D4Dr7ern       | XXXXXXXXXXXXXXXXXXXX  | CP1B3D4Dr7ern_Dryops_ernesti_833433_idba_contig_9          | XXXXXXXXXXXXXXXXXXXX---   | CP1B3D4Dr7ern_Dryops_ernesti_833433_idba_contig_9_MERGED          |
| -XX-----X-----     | CP1B3D4Dr7lur       | XXXXXXXXXXXXXXXXXXXX  | CP1B3D4Dr7lur_Dryops_luridus_1VWB.idba.12                  | XXXXXXXXXXXXXXXXXXXX---   | CP1B3D4Dr7lur_Dryops_luridus_1VWB.idba.12_MERGED                  |
| -X-----XX-XXX      | CP1B3E4E5Li7per     | --XXXXXXXXXXXX-----   | CP1B3E4E5Li7per_Limnius_perrisi_JX412747                   | -XXXXXXXXXXXX-XXX         | CP1B3E4E5Li7per_Limnius_perrisi_JX412747_MERGED                   |
| -X-----XX-X---     | CP1B3H4He7fen       | --XXXXXXXXXXXX-----   | CP1B3H4He7fen_Heterocerus_fenestratus_HQ232811             | -XXXXXXXXXXXXX-X---       | CP1B3H4He7fen_Heterocerus_fenestratus_HQ232811_MERGED             |
| -X-----X-XX-XX-    | CP1B3H4He7par       | XXXXXXXXXXXXXXXXXXXX  | CP1B3H4He7par_Heterocerus_parallelus_ameie.idba.47         | XXXXXXXXXXXXXXXXXXXX----- | CP1B3H4He7par_Heterocerus_parallelus_ameie.idba.47_MERGED         |
| -XX-----XX-XXX     | CP1C3C4Tr7leu       | XXXXXX-----           | CP1C3C4Tr7leu_Trichodes_leucopsidens_ameie.idba.184        | XXXXXX-----XX-XXX         | CP1C3C4Tr7leu_Trichodes_leucopsidens_ameie.idba.184_MERGED        |
| XXXXXXXXXXXXX-X-   | CP1C3M4C5Ch7sca     | XXXXXXXXXXXXXXXXXXXX  | CP1C3M4C5Ch7sca_Chaetosoma_scaritides_NC_011324            | XXXXXXXXXXXXXXXXXXXX---   | CP1C3M4C5Ch7sca_Chaetosoma_scaritides_NC_011324_MERGED            |
| -X-----X-XX-XXX    | CP1C3P4Ph7edw       | XXXXXXXXXXXXXXXXXXXX  | CP1C3P4Ph7edw_Phloiophilus_edwardsi_JX412815               | XXXXXXXXXXXXXXXXXXXX-XX-  | CP1C3P4Ph7edw_Phloiophilus_edwardsi_JX412815_MERGED               |
| -X-----X-----      | CP1C3T4T5Tem7vir    | XXXXXXXXXXXXXXXXXXXX  | CP1C3T4T5Tem7vir_Temososcheila_virescens_JX412752          | XXXXXXXXXXXXXXXXXXXX-XXX  | CP1C3T4T5Tem7vir_Temososcheila_virescens_JX412752_MERGED          |
| -X-----XXX-XX-     | CP1Ch3C4C5C6Ch7ame  | -----XXXXXXXXXXXX     | CP1Ch3C4C5C6Ch7ame_Chrysolina_americanana_Chryso.idba.155  | -X-----XXXXXXXXXX-XX-     | CP1Ch3C4C5C6Ch7ame_Chrysolina_americanana_Chryso.idba.155_MERGED  |
| -XX-----XXX-X-     | CP1Ch3C4C5C6Ch7ban  | XXXXXXXXXXXXXXXXXXXX  | CP1Ch3C4C5C6Ch7ban_Chrysolina_bankii_Chryso.idba.17        | XXXXXXXXXXXXXXXXXXXX-X-   | CP1Ch3C4C5C6Ch7ban_Chrysolina_bankii_Chryso.idba.17_MERGED        |
| -XX-----XXX-XX-    | CP1Ch3C4C5C6Ch7hae  | XXXXXXXXXXXXXXXXXXXX  | CP1Ch3C4C5C6Ch7hae_Chrysolina_haemoptera_Chryso.idba.38    | XXXXXXXXXXXXXXXXXXXX-XX-  | CP1Ch3C4C5C6Ch7hae_Chrysolina_haemoptera_Chryso.idba.38_MERGED    |
| -XX-----XXX-XX-    | CP1Ch3C4C5C6Ch7her  | XXXXXXXXXXXXXXXXXXXX  | CP1Ch3C4C5C6Ch7her_Chrysolina_herbacea_Chryso.idba.10      | XXXXXXXXXXXXXXXXXXXX---   | CP1Ch3C4C5C6Ch7her_Chrysolina_herbacea_Chryso.idba.10_MERGED      |
| -XX-----XXX-XX-    | CP1Ch3C4C5C6Ch7hyp  | -XXXXXXXXXXXXXXXXXXXX | CP1Ch3C4C5C6Ch7hyp_Chrysolina_hyperici_Chryso.idba.134     | -XXXXXXXXXXXXXXXXXXXX-XX- | CP1Ch3C4C5C6Ch7hyp_Chrysolina_hyperici_Chryso.idba.134_MERGED     |
| -X-----XXX-XX-     | CP1Ch3C4C5C6Ch7lep  | XXXXXX-----           | CP1Ch3C4C5C6Ch7lep_Chrysolina_lepida_Chryso.idba.151       | XXXXXX-----XXX-XX-        | CP1Ch3C4C5C6Ch7lep_Chrysolina_lepida_Chryso.idba.151_MERGED       |
| -XX-----XXX-XX-    | CP1Ch3C4C5C6Ch7pol  | XXXXXXXXXXXXXXXXXXXX  | CP1Ch3C4C5C6Ch7pol_Chrysolina_polita_Chryso.idba.123       | XXXXXXXXXXXXXXXXXXXX---   | CP1Ch3C4C5C6Ch7pol_Chrysolina_polita_Chryso.idba.123_MERGED       |
| -X-----X-XX-XX-    | CP1Ch3C4C5C6Ch7ruf  | XXXXXXXXXXXXXXXXXXXX  | CP1Ch3C4C5C6Ch7ruf_Chrysolina_rufoaeana_Chryso.idba.131    | XXXXXXXXXXXXXXXXXXXX-XX-  | CP1Ch3C4C5C6Ch7ruf_Chrysolina_rufoaeana_Chryso.idba.131_MERGED    |
| -X-----XX-XX-      | CP1Ch3C4C5C6Ch7ver  | XXXXXXXXXXXXXXXXXXXX  | CP1Ch3C4C5C6Ch7ver_Chrysolina_vernalis_Chryso.idba.25      | XXXXXXXXXXXXXXXXXXXX-XX-  | CP1Ch3C4C5C6Ch7ver_Chrysolina_vernalis_Chryso.idba.25_MERGED      |
| -XXX-----X-XXX-    | CP1Ch3C4C5C6Ch7pop  | XXXXXXXXXXXXXXXXXXXX  | CP1Ch3C4C5C6Ch7pop_Chrysomela_populi_ameie.idba.70         | XXXXXXXXXXXXXXXXXXXX---   | CP1Ch3C4C5C6Ch7pop_Chrysomela_populi_ameie.idba.70_MERGED         |
| -X-----X-XX-XX-    | CP1Ch3C4C5C6Col7bar | XXXXXXXXXXXXXXXXXXXX  | CP1Ch3C4C5C6Col7bar_Colaspidea_barbarum_Chryso.idba.24     | XXXXXXXXXXXXXXXXXXXX-XX-  | CP1Ch3C4C5C6Col7bar_Colaspidea_barbarum_Chryso.idba.24_MERGED     |
| -X-----X-XX-XX-    | CP1Ch3C4C5C6Go7aeg  | XXXXXXXXXXXXXXXXXXXX  | CP1Ch3C4C5C6Go7aeg_Gonioctena_aegrota_Chryso.idba.29       | XXXXXXXXXXXXXXXXXXXX-XX-  | CP1Ch3C4C5C6Go7aeg_Gonioctena_aegrota_Chryso.idba.29_MERGED       |
| -X-----X-XX-XX-    | CP1Ch3C4C5C6Go7lep  | XXXXXXXXXXXXXXXXXXXX  | CP1Ch3C4C5C6Go7lep_Gonioctena_lepraeuri_Chryso.idba.15     | XXXXXXXXXXXXXXXXXXXX-XX-  | CP1Ch3C4C5C6Go7lep_Gonioctena_lepraeuri_Chryso.idba.15_MERGED     |



|                  |                     |                     |                                                                  |                     |                                                                         |
|------------------|---------------------|---------------------|------------------------------------------------------------------|---------------------|-------------------------------------------------------------------------|
| -XX-----XX-XX    | CP1Ch3C4C5C6Go7oli  | XXXXXXXXXXXXX----   | CP1Ch3C4C5C6Go7oli_Gonioctena_olivacea_Chryso.idba.3             | XXXXXXXXXXXXX-XX    | CP1Ch3C4C5C6Go7oli_Gonioctena_olivacea_Chryso.idba.3_MERGED             |
| --X-----XX-XX    | CP1Ch3C4C5C6Hy7fai  | XXXXXXXXXXXXX----   | CP1Ch3C4C5C6Hy7fai_Hydrothassa_fairmairei_Chryso.idba.12         | XXXXXXXXXXXXX-XX    | CP1Ch3C4C5C6Hy7fai_Hydrothassa_fairmairei_Chryso.idba.12_MERGED         |
| --X-----X--XX    | CP1Ch3C4C5C6Hy7gla  | XXXXXXXXXXXXX----   | CP1Ch3C4C5C6Hy7gla_Hydrothassa_glabra_Chryso.idba.9              | XXXXXXXXXXXXX-XX    | CP1Ch3C4C5C6Hy7gla_Hydrothassa_glabra_Chryso.idba.9_MERGED              |
| -XX-----XXXXXX   | CP1Ch3C4C5C6Li7aen  | XXXXXXXXXXXXX----   | CP1Ch3C4C5C6Li7aen_Plagiosterna_aenea_Chryso.idba.2              | XXXXXXXXXXXXX-XX    | CP1Ch3C4C5C6Li7aen_Plagiosterna_aenea_Chryso.idba.2_MERGED              |
| -XX-----XX-XX    | CP1Ch3C4C5C6Ph7arm  | --XXXXXXXXXXXXX---- | CP1Ch3C4C5C6Ph7arm_Phaedon_armoraciae_JX220992                   | -XXXXXXXXXXXXX-XX   | CP1Ch3C4C5C6Ph7arm_Phaedon_armoraciae_JX220992_MERGED                   |
| --X-----X--XX    | CP1Ch3C4C5C6Ph7tum  | XXXXXXXXXXXXX----   | CP1Ch3C4C5C6Ph7tum_Phaedon_tumidulus_Chryso.idba.4               | XXXXXXXXXXXXX-XX    | CP1Ch3C4C5C6Ph7tum_Phaedon_tumidulus_Chryso.idba.4_MERGED               |
| -XX-----XXXX     | CP1Ch3C4C5C6Phr7vit | XXXXXXXXXXXXX----   | CP1Ch3C4C5C6Phr7vit_Phratora_vitellinae_Chryso.idba.79           | XXXXXXXXXXXXX-XX    | CP1Ch3C4C5C6Phr7vit_Phratora_vitellinae_Chryso.idba.79_MERGED           |
| -XX-----X--XX    | CP1Ch3C4C5C6Phr7vul | XXXXXXXXXXXXX----   | CP1Ch3C4C5C6Phr7vul_Phratora_vulgatissima_amie.idba.119          | XXXXXXXXXXXXX-XX    | CP1Ch3C4C5C6Phr7vul_Phratora_vulgatissima_amie.idba.119_MERGED          |
| -----XX-----     | CP1Ch3C4C5E6En7ado  | XXXXXXXXXXXXX----   | CP1Ch3C4C5E6En7ado_Entomoscelis_adonidis_Chryso.idba.57          | XXXXXXXXXXXXX-XX    | CP1Ch3C4C5E6En7ado_Entomoscelis_adonidis_Chryso.idba.57_MERGED          |
| -XX-----XX----   | CP1Ch3C4C5T6Ti7goe  | -XXXXXXXXXXXXX----  | CP1Ch3C4C5T6Ti7goe_Timarcha_goettingensis_JX412789               | -XXXXXXXXXXXXX-XX   | CP1Ch3C4C5T6Ti7goe_Timarcha_goettingensis_JX412789_MERGED               |
| --X-----XX-XXX   | CP1Ch3C4Ca5Ar7lab   | --XXXXXXXXXXXXX---- | CP1Ch3C4Ca5Ar7lab_Arescus_labiatuus_JX220988                     | --XXXXXXXXXXXXX-XXX | CP1Ch3C4Ca5Ar7lab_Arescus_labiatuus_JX220988_MERGED                     |
| -XX-----X--XX    | CP1Ch3C4Ca5Ca7den   | XXXXXXXXXXXXX----   | CP1Ch3C4Ca5Ca7den_Cassida_denticollis_Chryso.idba.59             | XXXXXXXXXXXXX-XX    | CP1Ch3C4Ca5Ca7den_Cassida_denticollis_Chryso.idba.59_MERGED             |
| -XX-----XX-XXX   | CP1Ch3C4Ca5Ca7rub   | XXXXXXXXXXXXX----   | CP1Ch3C4Ca5Ca7rub_Cassida_rubiginosa_Chryso.idba.121             | XXXXXXXXXXXXX-XX    | CP1Ch3C4Ca5Ca7rub_Cassida_rubiginosa_Chryso.idba.121_MERGED             |
| -XX-----X--XX    | CP1Ch3C4Ca5Ca7vib   | --XXXXXXXXXXXXX---- | CP1Ch3C4Ca5Ca7vib_Cassida_vibex_Chryso.idba.154                  | -XXXXXXXXXXXXX-XX   | CP1Ch3C4Ca5Ca7vib_Cassida_vibex_Chryso.idba.154_MERGED                  |
| -XX-----X--XX    | CP1Ch3C4Ca5Ca7vir   | XXXXXXXXXXXXX----   | CP1Ch3C4Ca5Ca7vir_Cassida_viridis_Chryso.idba.6                  | XXXXXXXXXXXXX-XX    | CP1Ch3C4Ca5Ca7vir_Cassida_viridis_Chryso.idba.6_MERGED                  |
| --X-----XX-XXX   | CP1Ch3C4Ca5Im7cap   | --XXXXXXXXXXXXX---- | CP1Ch3C4Ca5Im7cap_Imatidium_capense_JX220993                     | --XXXXXXXXXXXXX-XXX | CP1Ch3C4Ca5Im7cap_Imatidium_capense_JX220993_MERGED                     |
| --X-----X--XX    | CP1Ch3C4C15Ch7obe   | XXXXXXXXXXXXX----   | CP1Ch3C4C15Ch7obe_Chilotomina_obethuri_Chryso.idba.32            | XXXXXXXXXXXXX-XX    | CP1Ch3C4C15Ch7obe_Chilotomina_obethuri_Chryso.idba.32_MERGED            |
| --X-----X--XX    | CP1Ch3C4C15La7gal   | XXXXXXXXXXXXX----   | CP1Ch3C4C15La7gal_Lachnaia_gallaeca_Chryso.idba.66               | XXXXXXXXXXXXX-XX    | CP1Ch3C4C15La7gal_Lachnaia_gallaeca_Chryso.idba.66_MERGED               |
| -X-----X--XX     | CP1Ch3C4C15La7hir   | XXXXXXXXXXXXX----   | CP1Ch3C4C15La7hir_Lachnaia_hirta_Chryso.idba.55                  | XXXXXXXXXXXXX-XX    | CP1Ch3C4C15La7hir_Lachnaia_hirta_Chryso.idba.55_MERGED                  |
| -X-----X--XX     | CP1Ch3C4C15La7pub   | XXXXXXXXXXXXX----   | CP1Ch3C4C15La7pub_Lachnaia_pubescens_Chryso.idba.36              | XXXXXXXXXXXXX-XX    | CP1Ch3C4C15La7pub_Lachnaia_pubescens_Chryso.idba.36_MERGED              |
| --X-----XX-XXX   | CP1Ch3C4C15La7tri   | XXXXXXXXXXXXX----   | CP1Ch3C4C15La7tri_Lachnaia_tristigma_Chryso.idba.68              | XXXXXXXXXXXXX-XXX   | CP1Ch3C4C15La7tri_Lachnaia_tristigma_Chryso.idba.68_MERGED              |
| -----X--XX       | CP1Ch3C4C15Lab7ghi  | XXXXXXXXXXXXX----   | CP1Ch3C4C15Lab7ghi_Labidostomis_ghiliani_Chryso.idba.91          | XXXXXXXXXXXXX-XX    | CP1Ch3C4C15Lab7ghi_Labidostomis_ghiliani_Chryso.idba.91_MERGED          |
| -X-----X--XX     | CP1Ch3C4C15Lab7luc  | XXXXXXXXXXXXX----   | CP1Ch3C4C15Lab7luc_Labidostomis_lucida_Chryso.idba.90            | XXXXXXXXXXXXX-XX    | CP1Ch3C4C15Lab7luc_Labidostomis_lucida_Chryso.idba.90_MERGED            |
| -----XX-XXX      | CP1Ch3C4C15Lab7lus  | XXXXXXXXXXXXX----   | CP1Ch3C4C15Lab7lus_Labidostomis_lusitanica_Chryso.idba.65        | XXXXXXXXXXXXX-XX    | CP1Ch3C4C15Lab7lus_Labidostomis_lusitanica_Chryso.idba.65_MERGED        |
| -----X--XX       | CP1Ch3C4C15Lab7tax  | XXXXXXXXXXXXX----   | CP1Ch3C4C15Lab7tax_Labidostomis_taxicornis_Chryso.idba.92        | XXXXXXXXXXXXX-XX    | CP1Ch3C4C15Lab7tax_Labidostomis_taxicornis_Chryso.idba.92_MERGED        |
| -X-----XX-XXX    | CP1Ch3C4C15Sm7con   | XXXXXXXXXXXXX----   | CP1Ch3C4C15Sm7con_Smaragdina_concolor_Chryso.idba.37             | XXXXXXXXXXXXX-XXX   | CP1Ch3C4C15Sm7con_Smaragdina_concolor_Chryso.idba.37_MERGED             |
| -X-----XX-XXX    | CP1Ch3C4C15Sm7rey   | XXXXXXXXXXXXX----   | CP1Ch3C4C15Sm7rey_Smaragdina_reyi_Chryso.idba.52                 | XXXXXXXXXXXXX-XXX   | CP1Ch3C4C15Sm7rey_Smaragdina_reyi_Chryso.idba.52_MERGED                 |
| -X-----X--XX     | CP1Ch3C4C15Sm7ruf   | XXXXXXXXXXXXX----   | CP1Ch3C4C15Sm7ruf_Smaragdina_rufimana_Chryso.idba.20             | XXXXXXXXXXXXX-XX    | CP1Ch3C4C15Sm7ruf_Smaragdina_rufimana_Chryso.idba.20_MERGED             |
| XXXXXXXXXXXXX-X- | CP1Ch3C4Cr5Cr7duo   | XXXXXXXXXXXXX----   | CP1Ch3C4Cr5Cr7duo_Crioceris_duodecimpunctata_NC_003372           | XXXXXXXXXXXXX-X-    | CP1Ch3C4Cr5Cr7duo_Crioceris_duodecimpunctata_NC_003372_MERGED           |
| -X-----X--XX     | CP1Ch3C4Cr5Ou7gal   | XXXXXXXXXXXXX----   | CP1Ch3C4Cr5Ou7gal_Oulema_gallaeciana_Chryso.idba.130             | XXXXXXXXXXXXX-XX    | CP1Ch3C4Cr5Ou7gal_Oulema_gallaeciana_Chryso.idba.130_MERGED             |
| -XX-----X--XXX   | CP1Ch3C4Cr5Ou7mel   | XXXXXXXXXXXXX----   | CP1Ch3C4Cr5Ou7mel_Oulema_melanopus_Chryso.idba.13                | XXXXXXXXXXXXX-XXX   | CP1Ch3C4Cr5Ou7mel_Oulema_melanopus_Chryso.idba.13_MERGED                |
| -XX-----X----    | CP1Ch3C4Cry5Cr7and  | XXXXXXXXXXXXX----   | CP1Ch3C4Cry5Cr7and_Cryptocephalus_androgyne_Chryso.idba.100      | XXXXXXXXXXXXX-XX    | CP1Ch3C4Cry5Cr7and_Cryptocephalus_androgyne_Chryso.idba.100_MERGED      |
| -XX-----X----    | CP1Ch3C4Cry5Cr7aur  | XXXXXXXXXXXXX----   | CP1Ch3C4Cry5Cr7aur_Cryptocephalus_aureolus_Chryso.idba.54        | XXXXXXXXXXXXX-XX    | CP1Ch3C4Cry5Cr7aur_Cryptocephalus_aureolus_Chryso.idba.54_MERGED        |
| -XX-----X-XXXX   | CP1Ch3C4Cry5Cr7bip  | XXXXXXXXXXXXX----   | CP1Ch3C4Cry5Cr7bip_Cryptocephalus_bipunctatus_Chryso.idba.99     | XXXXXXXXXXXXX-XX    | CP1Ch3C4Cry5Cr7bip_Cryptocephalus_bipunctatus_Chryso.idba.99_MERGED     |
| -X-----X-X-XX    | CP1Ch3C4Cry5Cr7can  | XXXXXXXXXXXXX----   | CP1Ch3C4Cry5Cr7can_Cryptocephalus_cantabricus_Chryso.idba.87     | XXXXXXXXXXXXX-XX    | CP1Ch3C4Cry5Cr7can_Cryptocephalus_cantabricus_Chryso.idba.87_MERGED     |
| -X-----X--XX     | CP1Ch3C4Cry5Cr7cel  | XXXXXXXXXXXXX----   | CP1Ch3C4Cry5Cr7cel_Cryptocephalus_celtibericus_Chryso.idba.56    | XXXXXXXXXXXXX-XX    | CP1Ch3C4Cry5Cr7cel_Cryptocephalus_celtibericus_Chryso.idba.56_MERGED    |
| -X-----X-X-XX    | CP1Ch3C4Cry5Cr7cyn  | XXXXXXXXXXXXX----   | CP1Ch3C4Cry5Cr7cyn_Cryptocephalus_cynarae_Chryso.idba.63         | XXXXXXXXXXXXX-XX    | CP1Ch3C4Cry5Cr7cyn_Cryptocephalus_cynarae_Chryso.idba.63_MERGED         |
| -X-----X--XX     | CP1Ch3C4Cry5Cr7liv  | XXXXXXXXXXXXX----   | CP1Ch3C4Cry5Cr7liv_Cryptocephalus_lividimanus_Chryso.idba.85     | XXXXXXXXXXXXX-XX    | CP1Ch3C4Cry5Cr7liv_Cryptocephalus_lividimanus_Chryso.idba.85_MERGED     |
| -XX-----XXXX     | CP1Ch3C4Cry5Cr7mor  | XXXXXXXXXXXXX----   | CP1Ch3C4Cry5Cr7mor_Cryptocephalus_moraei_Chryso.idba.107         | XXXXXXXXXXXXX-XX    | CP1Ch3C4Cry5Cr7mor_Cryptocephalus_moraei_Chryso.idba.107_MERGED         |
| -X-----X--XX     | CP1Ch3C4Cry5Cr7mys  | XXXXXXXXXXXXX----   | CP1Ch3C4Cry5Cr7mys_Cryptocephalus_mystacatus_Chryso.idba.41      | XXXXXXXXXXXXX-XX    | CP1Ch3C4Cry5Cr7mys_Cryptocephalus_mystacatus_Chryso.idba.41_MERGED      |
| -X-----X--XX     | CP1Ch3C4Cry5Cr7obl  | XXXXXXXXXXXXX----   | CP1Ch3C4Cry5Cr7obl_Cryptocephalus_obliteratifer_Chryso.idba.104  | XXXXXXXXXXXXX-XX    | CP1Ch3C4Cry5Cr7obl_Cryptocephalus_obliteratifer_Chryso.idba.104_MERGED  |
| -XX-----X-X-XX   | CP1Ch3C4Cry5Cr7oct  | XXXXXXXXXXXXX----   | CP1Ch3C4Cry5Cr7oct_Cryptocephalus_octoguttatus_Chryso.idba.124   | XXXXXXXXXXXXX-XX    | CP1Ch3C4Cry5Cr7oct_Cryptocephalus_octoguttatus_Chryso.idba.124_MERGED   |
| -X-----X-X-XX    | CP1Ch3C4Cry5Cr7pom  | XXXXXXXXXXXXX----   | CP1Ch3C4Cry5Cr7pom_Cryptocephalus_pominorum_Chryso.idba.94       | XXXXXXXXXXXXX-XX    | CP1Ch3C4Cry5Cr7pom_Cryptocephalus_pominorum_Chryso.idba.94_MERGED       |
| -XX-----X--XX    | CP1Ch3C4Cry5Cr7pus  | XXXXXXXXXXXXX----   | CP1Ch3C4Cry5Cr7pus_Cryptocephalus_pusillus_Chryso.idba.53        | XXXXXXXXXXXXX-XX    | CP1Ch3C4Cry5Cr7pus_Cryptocephalus_pusillus_Chryso.idba.53_MERGED        |
| -X-----X----     | CP1Ch3C4Cry5Cr7qua  | XXXXXXXXXXXXX----   | CP1Ch3C4Cry5Cr7qua_Cryptocephalus_quadripunctatus_Chryso.idba.83 | XXXXXXXXXXXXX-XX    | CP1Ch3C4Cry5Cr7qua_Cryptocephalus_quadripunctatus_Chryso.idba.83_MERGED |
| -X-----X-X-XX    | CP1Ch3C4Cry5Cr7ram  | XXXXXXXXXXXXX----   | CP1Ch3C4Cry5Cr7ram_Cryptocephalus_ramburii_Chryso.idba.88        | XXXXXXXXXXXXX-XX    | CP1Ch3C4Cry5Cr7ram_Cryptocephalus_ramburii_Chryso.idba.88_MERGED        |
| -X-----X--XX     | CP1Ch3C4Cry5Cr7ruf  | XXXXXXXXXXXXX----   | CP1Ch3C4Cry5Cr7ruf_Cryptocephalus_rufipes_Chryso.idba.77         | XXXXXXXXXXXXX-XX    | CP1Ch3C4Cry5Cr7ruf_Cryptocephalus_rufipes_Chryso.idba.77_MERGED         |
| -X-----X-XX      | CP1Ch3C4Cry5Cr7rug  | XXXXXXXXXXXXX----   | CP1Ch3C4Cry5Cr7rug_Cryptocephalus_rugicollis_Chryso.idba.95      | XXXXXXXXXXXXX-XX    | CP1Ch3C4Cry5Cr7rug_Cryptocephalus_rugicollis_Chryso.idba.95_MERGED      |
| -X-----X--XX     | CP1Ch3C4Cry5Cr7sau  | XXXXXXXXXXXXX----   | CP1Ch3C4Cry5Cr7sau_Cryptocephalus_saucius_Chryso.idba.143        | XXXXXXXXXXXXX-XX    | CP1Ch3C4Cry5Cr7sau_Cryptocephalus_saucius_Chryso.idba.143_MERGED        |
| -X-----X--XX     | CP1Ch3C4Cry5Cr7sch  | XXXXXXXXXXXXX----   | CP1Ch3C4Cry5Cr7sch_Cryptocephalus_schaefferi_Chryso.idba.49      | XXXXXXXXXXXXX-XX    | CP1Ch3C4Cry5Cr7sch_Cryptocephalus_schaefferi_Chryso.idba.49_MERGED      |
| -X-----X-X-XX    | CP1Ch3C4Cry5Cr7tib  | XXXXXXXXXXXXX----   | CP1Ch3C4Cry5Cr7tib_Cryptocephalus_tibialis_Chryso.idba.101       | XXXXXXXXXXXXX-XX    | CP1Ch3C4Cry5Cr7tib_Cryptocephalus_tibialis_Chryso.idba.101_MERGED       |
| -XX-----X--XX    | CP1Ch3C4Cry5Cr7vit  | XXXXXXXXXXXXX----   | CP1Ch3C4Cry5Cr7vit_Cryptocephalus_vittatus_Chryso.idba.81        | XXXXXXXXXXXXX-XX    | CP1Ch3C4Cry5Cr7vit_Cryptocephalus_vittatus_Chryso.idba.81_MERGED        |
| -XX-----X--XX    | CP1Ch3C4Cry5Pa7reg  | XXXXXXXXXXXXX----   | CP1Ch3C4Cry5Pa7reg_Pachybrachis_regius_Chryso.idba.138           | XXXXXXXXXXXXX-XX    | CP1Ch3C4Cry5Pa7reg_Pachybrachis_regius_Chryso.idba.138_MERGED           |
| -X-----X--XX     | CP1Ch3C4Cry5Pa7suf  | XXXXXXXXXXXXX----   | CP1Ch3C4Cry5Pa7suf_Pachybrachis_suffriani_Chryso.idba.98         | XXXXXXXXXXXXX-XX    | CP1Ch3C4Cry5Pa7suf_Pachybrachis_suffriani_Chryso.idba.98_MERGED         |
| -X-----X--XX     | CP1Ch3C4Cry5Pa7ter  | XXXXXXXXXXXXX----   | CP1Ch3C4Cry5Pa7ter_Pachybrachis_terminalis_Chryso.idba.96        | XXXXXXXXXXXXX-XX    | CP1Ch3C4Cry5Pa7ter_Pachybrachis_terminalis_Chryso.idba.96_MERGED        |

|                  |                       |                     |                                                               |                      |                                                                      |
|------------------|-----------------------|---------------------|---------------------------------------------------------------|----------------------|----------------------------------------------------------------------|
| --X-----X--XX-   | CP1Ch3C4Cry5St7ili    | XXXXXXXXXXXXX----   | CP1Ch3C4Cry5St7ili_Stylosomus_illicicola_Soil.idba.48         | XXXXXXXXXXXXX-XX-    | CP1Ch3C4Cry5St7ili_Stylosomus_illicicola_Soil.idba.48_MERGED         |
| --X-----X--XX-   | CP1Ch3C4Cry5St7rug    | XXXXXXXXXXXXX----   | CP1Ch3C4Cry5St7rug_Stylosomus_rugithorax_Chryso.idba.39       | XXXXXXXXXXXXX-XX-    | CP1Ch3C4Cry5St7rug_Stylosomus_rugithorax_Chryso.idba.39_MERGED       |
| --X-----XX-XXX-  | CP1Ch3C4Do7dis        | ---XXXXXXXXXX----   | CP1Ch3C4Do7dis_Donacia_distincta_JX220999                     | ---XXXXXXXXXXXX-XXX- | CP1Ch3C4Do7dis_Donacia_distincta_JX220999_MERGED                     |
| --X-----X---     | CP1Ch3C4Do7ful        | XXXXXXXXXXXXX----   | CP1Ch3C4Do7ful_Doryidomorpha_fulva_CS.idba.19                 | XXXXXXXXXXXXX-XX-    | CP1Ch3C4Do7ful_Doryidomorpha_fulva_CS.idba.19_MERGED                 |
| -X-----X--XXX    | CP1Ch3C4E5Br7obs      | XXXXXXXXXXXXX----   | CP1Ch3C4E5Br7obs_Bromius_obscurus_ameie.idba.82               | XXXXXXXXXXXXX--XXX   | CP1Ch3C4E5Br7obs_Bromius_obscurus_ameie.idba.82_MERGED               |
| --X-----X--XXX   | CP1Ch3C4E5Colas7glo   | XXXXXXXXXXXXX----   | CP1Ch3C4E5Colas7glo_Colaspdea_globosa_Chryso.idba.110         | XXXXXXXXXXXXX-XX-    | CP1Ch3C4E5Colas7glo_Colaspdea_globosa_Chryso.idba.110_MERGED         |
| --X-----XX-XXX   | CP1Ch3C4E5Phy7dil     | -----XXXXXXXXXX---- | CP1Ch3C4E5Phy7dil_Phytorus_dilatatus_B480tru.idba.116         | --X-----XXXX-XXX     | CP1Ch3C4E5Phy7dil_Phytorus_dilatatus_B480tru.idba.116_MERGED         |
| --X-----X--XXX   | CP1Ch3C4Ex7can        | ---XXXXXXXXXX----   | CP1Ch3C4Ex7can_Exema_canadensis_JX220990                      | ---XXXXXXXXXXXX-XXX  | CP1Ch3C4Ex7can_Exema_canadensis_JX220990_MERGED                      |
| -----XXX         | CP1Ch3C4G5A6Ac7ass    | XXXXXXXXXXXXX----   | CP1Ch3C4G5A6Ac7ass_Acrocrypta_assamensis_CS.idba.43           | XXXXXXXXXXXXX-XXX    | CP1Ch3C4G5A6Ac7ass_Acrocrypta_assamensis_CS.idba.43_MERGED           |
| ---XX-----X--XX- | CP1Ch3C4G5A6Alt7amp   | XXXXXXX-----        | CP1Ch3C4G5A6Alt7amp_Altica_ampelophaga_Chryso.idba.149        | XXXXXXX---X--XX-     | CP1Ch3C4G5A6Alt7amp_Altica_ampelophaga_Chryso.idba.149_MERGED        |
| ---XX-----X--XX- | CP1Ch3C4G5A6Alt7eri   | XXXXXXXX-----       | CP1Ch3C4G5A6Alt7eri_Altica_ericeti_Chryso.idba.163            | XXXXXXXX---X--XX-    | CP1Ch3C4G5A6Alt7eri_Altica_ericeti_Chryso.idba.163_MERGED            |
| ---XX-----X--XX- | CP1Ch3C4G5A6Alt7ole   | XXXXXXXXXXXXX----   | CP1Ch3C4G5A6Alt7ole_Altica_oleracea_Chryso.idba.51            | XXXXXXXXXXXXX-XXX    | CP1Ch3C4G5A6Alt7ole_Altica_oleracea_Chryso.idba.51_MERGED            |
| ---XX-----X--XX- | CP1Ch3C4G5A6Ap7orb    | XXXXXXXXXXXXX----   | CP1Ch3C4G5A6Ap7orb_Apteropeda_orbiculata_Chryso.idba.18       | XXXXXXXXXXXXX-XXX    | CP1Ch3C4G5A6Ap7orb_Apteropeda_orbiculata_Chryso.idba.18_MERGED       |
| ---XX-----X--XX- | CP1Ch3C4G5A6Ap7ovu    | XXXXXXXXXXXXX----   | CP1Ch3C4G5A6Ap7ovu_Apteropeda_ovulum_Chryso.idba.23           | XXXXXXXXXXXXX-XXX    | CP1Ch3C4G5A6Ap7ovu_Apteropeda_ovulum_Chryso.idba.23_MERGED           |
| ---XX-----X--XXX | CP1Ch3C4G5A6Aph77col  | XXXXXXXXXXXXX----   | CP1Ch3C4G5A6Aph77col_Aphthonomorpha_collaris_ChrysoT.idba.34  | XXXXXXXXXXXXX-XXX    | CP1Ch3C4G5A6Aph77col_Aphthonomorpha_collaris_ChrysoT.idba.34_MERGED  |
| -----X--XX-      | CP1Ch3C4G5A6Aph77alb  | XXXXXXXXXXXXX----   | CP1Ch3C4G5A6Aph77alb_Aphthona_albertinae_Chryso.idba.48       | XXXXXXXXXXXXX-XX-    | CP1Ch3C4G5A6Aph77alb_Aphthona_albertinae_Chryso.idba.48_MERGED       |
| ---XX-----X--XX- | CP1Ch3C4G5A6Aph77eup  | XXXXXXXXXXXXX----   | CP1Ch3C4G5A6Aph77eup_Aphthona_euphorbiae_Chryso.idba.42       | XXXXXXXXXXXXX-XX-    | CP1Ch3C4G5A6Aph77eup_Aphthona_euphorbiae_Chryso.idba.42_MERGED       |
| ---XX-----X--XX- | CP1Ch3C4G5A6Aph77lut  | XXXXXXXXXXXXX----   | CP1Ch3C4G5A6Aph77lut_Aphthona_lutescens_Chryso.idba.103       | XXXXXXXXXXXXX-XX-    | CP1Ch3C4G5A6Aph77lut_Aphthona_lutescens_Chryso.idba.103_MERGED       |
| ---XX-----X--XX- | CP1Ch3C4G5A6Aph77mel  | XXXXXXXXXXXXX----   | CP1Ch3C4G5A6Aph77mel_Aphthona_melancholica_Chryso.idba.71     | XXXXXXXXXXXXX-XX-    | CP1Ch3C4G5A6Aph77mel_Aphthona_melancholica_Chryso.idba.71_MERGED     |
| ---X-----XX-XXX  | CP1Ch3C4G5A6As17tra   | XXXXXXXXXXXXX----   | CP1Ch3C4G5A6As17tra_Asiorestia_transversa_ChrysoT.idba.7      | XXXXXXXXXXXXX-XXX    | CP1Ch3C4G5A6As17tra_Asiorestia_transversa_ChrysoT.idba.7_MERGED      |
| ---X-----X--XX-  | CP1Ch3C4G5A6Ba7aer    | XXXXXXXXXXXXX----   | CP1Ch3C4G5A6Ba7aer_Batophila_aerata_Chryso.idba.47            | XXXXXXXXXXXXX-XX-    | CP1Ch3C4G5A6Ba7aer_Batophila_aerata_Chryso.idba.47_MERGED            |
| ---X-----XX-XXX  | CP1Ch3C4G5A6Ch7ang    | XXXXXXXXXXXXX----   | CP1Ch3C4G5A6Ch7ang_Chabria_nr_angulicollis_ChrysoT.idba.36    | XXXXXXXXXXXXX-XXX    | CP1Ch3C4G5A6Ch7ang_Chabria_nr_angulicollis_ChrysoT.idba.36_MERGED    |
| -----X--XX-      | CP1Ch3C4G5A6Chae7ari  | XXXXXXXXXXXXX----   | CP1Ch3C4G5A6Chae7ari_Chaetocnema_arida_Chryso.idba.82         | XXXXXXXXXXXXX-XX-    | CP1Ch3C4G5A6Chae7ari_Chaetocnema_arida_Chryso.idba.82_MERGED         |
| ---X-----X--XX-  | CP1Ch3C4G5A6Chae7dep  | XXXXXXXXXXXXX----   | CP1Ch3C4G5A6Chae7dep_Chaetocnema_depressa_Chryso.idba.43      | XXXXXXXXXXXXX-XX-    | CP1Ch3C4G5A6Chae7dep_Chaetocnema_depressa_Chryso.idba.43_MERGED      |
| ---XX-----XX-    | CP1Ch3C4G5A6Chae7hor  | XXXXXXXXXXXXX----   | CP1Ch3C4G5A6Chae7hor_Chaetocnema_hortensis_Chryso.idba.125    | XXXXXXXXXXXXX-XXX    | CP1Ch3C4G5A6Chae7hor_Chaetocnema_hortensis_Chryso.idba.125_MERGED    |
| ---X-----XX-     | CP1Ch3C4G5A6Chae7obe  | XXXXXXXXXXXXX----   | CP1Ch3C4G5A6Chae7obe_Chaetocnema_obesa_Chryso.idba.93         | XXXXXXXXXXXXX-XX-    | CP1Ch3C4G5A6Chae7obe_Chaetocnema_obesa_Chryso.idba.93_MERGED         |
| ---X-----X--XX-  | CP1Ch3C4G5A6Chae7pag  | XXXXXXXXXXXXX----   | CP1Ch3C4G5A6Chae7pag_Chaetocnema_paganettii_Chryso.idba.78    | XXXXXXXXXXXXX-XX-    | CP1Ch3C4G5A6Chae7pag_Chaetocnema_paganettii_Chryso.idba.78_MERGED    |
| ---X-----XX-     | CP1Ch3C4G5A6Chae7pel  | XXXXXXXXXXXXX----   | CP1Ch3C4G5A6Chae7pel_Chaetocnema_pelagica_Chryso.idba.21      | XXXXXXXXXXXXX-XX-    | CP1Ch3C4G5A6Chae7pel_Chaetocnema_pelagica_Chryso.idba.21_MERGED      |
| -----X--XX-      | CP1Ch3C4G5A6Chae7sch  | XXXXXXXXXXXXX----   | CP1Ch3C4G5A6Chae7sch_Chaetocnema_scheffleri_Chryso.idba.69    | XXXXXXXXXXXXX-XX-    | CP1Ch3C4G5A6Chae7sch_Chaetocnema_scheffleri_Chryso.idba.69_MERGED    |
| ---XX-----X--XX- | CP1Ch3C4G5A6Chae7tib  | XXXXXXXXXXXXX----   | CP1Ch3C4G5A6Chae7tib_Chaetocnema_tibialis_Chryso.idba.75      | XXXXXXXXXXXXX-XX-    | CP1Ch3C4G5A6Chae7tib_Chaetocnema_tibialis_Chryso.idba.75_MERGED      |
| ---X-----XX-XXX  | CP1Ch3C4G5A6Chal77ful | -----XXXXXXXXXX---- | CP1Ch3C4G5A6Chal77ful_Chalcooides_fulvicornis_Chryso.idba.153 | --X---XXXXXXXXXX-XXX | CP1Ch3C4G5A6Chal77ful_Chalcooides_fulvicornis_Chryso.idba.153_MERGED |
| ---X-----X--XXX  | CP1Ch3C4G5A6Cre7p1u   | -----XXXXXXXXXX---- | CP1Ch3C4G5A6Cre7p1u_Crepidodera_pluta_ameie.idba.98           | -----XXXXXXXXXX-XXX  | CP1Ch3C4G5A6Cre7p1u_Crepidodera_pluta_ameie.idba.98_MERGED           |
| ---X-----X--XX-  | CP1Ch3C4G5A6Dib7occ   | XXXXXXXXXXXXX----   | CP1Ch3C4G5A6Dib7occ_Dibolia_occultans_Chryso.idba.132         | XXXXXXXXXXXXX-XX-    | CP1Ch3C4G5A6Dib7occ_Dibolia_occultans_Chryso.idba.132_MERGED         |
| ---X-----X--XX-  | CP1Ch3C4G5A6Dib7rug   | XXXXXXXXXXXXX----   | CP1Ch3C4G5A6Dib7rug_Dibolia_rugulosa_ameie.idba.94            | XXXXXXXXXXXXX-XXX    | CP1Ch3C4G5A6Dib7rug_Dibolia_rugulosa_ameie.idba.94_MERGED            |
| ---X-----XX-     | CP1Ch3C4G5A6Ep7abe    | XXXXXXXXXXXXX----   | CP1Ch3C4G5A6Ep7abe_Epitrix_abeillei_CS.idba.39                | XXXXXXXXXXXXX-XXX    | CP1Ch3C4G5A6Ep7abe_Epitrix_abeillei_CS.idba.39_MERGED                |
| ---XX-----XX-XXX | CP1Ch3C4G5A6He7p1a    | XXXXXXXXXXXXX----   | CP1Ch3C4G5A6He7p1a_Hemipyxis_plagioderoides_ChrysoT.idba.5    | XXXXXXXXXXXXX-XXX    | CP1Ch3C4G5A6He7p1a_Hemipyxis_plagioderoides_ChrysoT.idba.5_MERGED    |
| ---X-----X--XX-  | CP1Ch3C4G5A6Her7cic   | XXXXXXXXXX-----     | CP1Ch3C4G5A6Her7cic_Hermaeophaga_cicatrix_CS.idba.66          | XXXXXXXXXX---X--XX-  | CP1Ch3C4G5A6Her7cic_Hermaeophaga_cicatrix_CS.idba.66_MERGED          |
| -----XX-XXX      | CP1Ch3C4G5A6Lan7ram   | XXXXXXXXXXXXX----   | CP1Ch3C4G5A6Lan7ram_Lanka_ramakrishnai_ChrysoT.idba.39        | XXXXXXXXXXXXX-XXX    | CP1Ch3C4G5A6Lan7ram_Lanka_ramakrishnai_ChrysoT.idba.39_MERGED        |
| ---X-----X--XX-  | CP1Ch3C4G5A6Lo7aen    | XXXXXXXXXXXXX----   | CP1Ch3C4G5A6Lo7aen_Longitarsus_aeneus_Chryso.idba.115         | XXXXXXXXXXXXX-XX-    | CP1Ch3C4G5A6Lo7aen_Longitarsus_aeneus_Chryso.idba.115_MERGED         |
| ---XX-----X--XX- | CP1Ch3C4G5A6Lo7atr    | XXXXXXXXXXXXX----   | CP1Ch3C4G5A6Lo7atr_Longitarsus_atricillus_Chryso.idba.40      | XXXXXXXXXXXXX-XX-    | CP1Ch3C4G5A6Lo7atr_Longitarsus_atricillus_Chryso.idba.40_MERGED      |
| ---X-----X--XX-  | CP1Ch3C4G5A6Lo7cer    | XXXXXXXXXXXXX----   | CP1Ch3C4G5A6Lo7cer_Longitarsus_cerinthos_Chryso.idba.50       | XXXXXXXXXXXXX-XX-    | CP1Ch3C4G5A6Lo7cer_Longitarsus_cerinthos_Chryso.idba.50_MERGED       |
| ---XX-----X--XX- | CP1Ch3C4G5A6Lo7dor    | XXXXXXXXXXXXX----   | CP1Ch3C4G5A6Lo7dor_Longitarsus_dorsalis_Chryso.idba.108       | XXXXXXXXXXXXX-XX-    | CP1Ch3C4G5A6Lo7dor_Longitarsus_dorsalis_Chryso.idba.108_MERGED       |
| ---XX-----XX-XXX | CP1Ch3C4G5A6Lo7exs    | XXXXXXXXXXXXX----   | CP1Ch3C4G5A6Lo7exs_Longitarsus_exsoletus_Chryso.idba.102      | XXXXXXXXXXXXX-XXX    | CP1Ch3C4G5A6Lo7exs_Longitarsus_exsoletus_Chryso.idba.102_MERGED      |
| ---X-----XX-XXX  | CP1Ch3C4G5A6Lo7ibe    | XXXXXXXXXXXXX----   | CP1Ch3C4G5A6Lo7ibe_Longitarsus_ibericus_Chryso.idba.67        | XXXXXXXXXXXXX-XXX    | CP1Ch3C4G5A6Lo7ibe_Longitarsus_ibericus_Chryso.idba.67_MERGED        |
| ---XX-----X--XX- | CP1Ch3C4G5A6Lo7lur    | XXXXXXXXXXXXX----   | CP1Ch3C4G5A6Lo7lur_Longitarsus_luridus_Chryso.idba.72         | XXXXXXXXXXXXX-XX-    | CP1Ch3C4G5A6Lo7lur_Longitarsus_luridus_Chryso.idba.72_MERGED         |
| ---X-----X--XX-  | CP1Ch3C4G5A6Lo7me1    | XXXXXXXXXXXXX----   | CP1Ch3C4G5A6Lo7me1_Longitarsus_melanocephalus_Chryso.idba.26  | XXXXXXXXXXXXX-XX-    | CP1Ch3C4G5A6Lo7me1_Longitarsus_melanocephalus_Chryso.idba.26_MERGED  |
| ---X-----XX-XXX  | CP1Ch3C4G5A6Lo7mem    | XXXXXXXXXXXXX----   | CP1Ch3C4G5A6Lo7mem_Longitarsus_membranaceus_Chryso.idba.45    | XXXXXXXXXXXXX-XXX    | CP1Ch3C4G5A6Lo7mem_Longitarsus_membranaceus_Chryso.idba.45_MERGED    |
| ---X-----XX-XXX  | CP1Ch3C4G5A6Lo7nig    | XXXXXXXXXXXXX----   | CP1Ch3C4G5A6Lo7nig_Longitarsus_nigrofasciatus_Chryso.idba.89  | XXXXXXXXXXXXX-XXX    | CP1Ch3C4G5A6Lo7nig_Longitarsus_nigrofasciatus_Chryso.idba.89_MERGED  |
| ---XX-----X--XX- | CP1Ch3C4G5A6Lo7ord    | XXXXXXXXXXXXX----   | CP1Ch3C4G5A6Lo7ord_Longitarsus_ordinatus_Chryso.idba.106      | XXXXXXXXXXXXX-XXX    | CP1Ch3C4G5A6Lo7ord_Longitarsus_ordinatus_Chryso.idba.106_MERGED      |
| ---XX-----X--XX- | CP1Ch3C4G5A6Lo7par    | XXXXXXXXXX-----     | CP1Ch3C4G5A6Lo7par_Longitarsus_parvulus_Chryso.idba.145       | XXXXXXXXXX---X--XX-  | CP1Ch3C4G5A6Lo7par_Longitarsus_parvulus_Chryso.idba.145_MERGED       |
| ---X-----X--XX-  | CP1Ch3C4G5A6Lo7pra    | XXXXXXXXXXXXX----   | CP1Ch3C4G5A6Lo7pra_Longitarsus_pratensis_Chryso.idba.127      | XXXXXXXXXXXXX-XX-    | CP1Ch3C4G5A6Lo7pra_Longitarsus_pratensis_Chryso.idba.127_MERGED      |
| ---X-----X--XX-  | CP1Ch3C4G5A6Lo7rut    | XXXXXXXXXXXXX----   | CP1Ch3C4G5A6Lo7rut_Longitarsus_rutilus_Chryso.idba.61         | XXXXXXXXXXXXX-XX-    | CP1Ch3C4G5A6Lo7rut_Longitarsus_rutilus_Chryso.idba.61_MERGED         |
| ---XX-----X--XX- | CP1Ch3C4G5A6Lo7tab    | XXXXXXXXXXXXX----   | CP1Ch3C4G5A6Lo7tab_Longitarsus_tabidus_Chryso.idba.86         | XXXXXXXXXXXXX-XX-    | CP1Ch3C4G5A6Lo7tab_Longitarsus_tabidus_Chryso.idba.86_MERGED         |
| ---XX-----XX-XXX | CP1Ch3C4G5A6Lup7xan   | XXXXXXXX-----       | CP1Ch3C4G5A6Lup7xan_Luperomorpha_xanthodera_ameie.idba.160    | XXXXXXXX---XX-XXX    | CP1Ch3C4G5A6Lup7xan_Luperomorpha_xanthodera_ameie.idba.160_MERGED    |
| ---X-----XX-XXX  | CP1Ch3C4G5A6Lyp7pub   | XXXXXXXXXXXXX----   | CP1Ch3C4G5A6Lyp7pub_Lypnea_pubipennis_CS.idba.34              | XXXXXXXXXXXXX-XXX    | CP1Ch3C4G5A6Lyp7pub_Lypnea_pubipennis_CS.idba.34_MERGED              |

|                  |                      |                     |                                                              |                      |                                                                     |
|------------------|----------------------|---------------------|--------------------------------------------------------------|----------------------|---------------------------------------------------------------------|
| --X-----XX--XXX  | CP1Ch3C4G5A6Mac7sub  | XXXXXXXXXXXXX----   | CP1Ch3C4G5A6Mac7sub_Macrohaltica_subplicata_ChrysoT.idba.16  | XXXXXXXXXXXXX-XX     | CP1Ch3C4G5A6Mac7sub_Macrohaltica_subplicata_ChrysoT.idba.16_MERGED  |
| -XX-----X--XX-   | CP1Ch3C4G5A6Mant7chr | XXXXXXXXXXXXX----   | CP1Ch3C4G5A6Mant7chr_Mantura_chrysanthem1_Chryso.idba.58     | XXXXXXXXXXXXX-XX     | CP1Ch3C4G5A6Mant7chr_Mantura_chrysanthem1_Chryso.idba.58_MERGED     |
| -X-----X--XX-    | CP1Ch3C4G5A6Ne7bre   | XXXXXXXXXXXXX----   | CP1Ch3C4G5A6Ne7bre_Neocrepidodera_brevicollis_Chryso.idba.35 | XXXXXXXXXXXXX-XX     | CP1Ch3C4G5A6Ne7bre_Neocrepidodera_brevicollis_Chryso.idba.35_MERGED |
| -XX-----X--XX-   | CP1Ch3C4G5A6Ne7fer   | XXXXXXXXXXXXX----   | CP1Ch3C4G5A6Ne7fer_Neocrepidodera_ferruginea_Chryso.idba.112 | XXXXXXXXXXXXX-XX     | CP1Ch3C4G5A6Ne7fer_Neocrepidodera_ferruginea_Chryso.idba.112_MERGED |
| -XX-----X--XX-   | CP1Ch3C4G5A6Ne7tra   | XXXXXXXXXXXXX----   | CP1Ch3C4G5A6Ne7tra_Neocrepidodera_transversa_Chryso.idba.16  | XXXXXXXXXXXXX-XX     | CP1Ch3C4G5A6Ne7tra_Neocrepidodera_transversa_Chryso.idba.16_MERGED  |
| -XX-----X--XXX   | CP1Ch3C4G5A6Oe7cin   | XXXXXXXXXXXXX----   | CP1Ch3C4G5A6Oe7cin_Oedionychus_cinctus_ChrysoT.idba.19       | XXXXXXXXXXXXX-XXX    | CP1Ch3C4G5A6Oe7cin_Oedionychus_cinctus_ChrysoT.idba.19_MERGED       |
| --X-----XX-      | CP1Ch3C4G5A6Ore7pun  | --XXXXXXXXXX-----   | CP1Ch3C4G5A6Ore7pun_Orestia_punctipennis_CS.idba.63          | --XXXXXXXXXX-----XX- | CP1Ch3C4G5A6Ore7pun_Orestia_punctipennis_CS.idba.63_MERGED          |
| -X-----XX-       | CP1Ch3C4G5A6Phi7vib  | XXXXXXXXXXXXX----   | CP1Ch3C4G5A6Phi7vib_Philopona_vibex_ChrysoT.idba.38          | XXXXXXXXXXXXX----    | CP1Ch3C4G5A6Phi7vib_Philopona_vibex_ChrysoT.idba.38_MERGED          |
| -XXX-----XX-     | CP1Ch3C4G5A6Phy7cru  | XXXXXXXXXXXXX----   | CP1Ch3C4G5A6Phy7cru_Phyllostreta_cruciferae_Chryso.idba.105  | XXXXXXXXXXXXX-XX-    | CP1Ch3C4G5A6Phy7cru_Phyllostreta_cruciferae_Chryso.idba.105_MERGED  |
| -----XX-         | CP1Ch3C4G5A6Phy7fou  | XXXXXXXXXXXXX----   | CP1Ch3C4G5A6Phy7fou_Phyllostreta_foudrasi_Chryso.idba.113    | XXXXXXXXXXXXX-XX-    | CP1Ch3C4G5A6Phy7fou_Phyllostreta_foudrasi_Chryso.idba.113_MERGED    |
| -X-----XX-       | CP1Ch3C4G5A6Phy7hem  | XXXXXXXXXXXXX----   | CP1Ch3C4G5A6Phy7hem_Phyllostreta_hemipoda_Chryso.idba.109    | XXXXXXXXXXXXX-XX-    | CP1Ch3C4G5A6Phy7hem_Phyllostreta_hemipoda_Chryso.idba.109_MERGED    |
| -XX-----XX-      | CP1Ch3C4G5A6Phy7nig  | XXXXXXXXXXXXX----   | CP1Ch3C4G5A6Phy7nig_Phyllostreta_nigripes_ChrysoT.idba.54    | XXXXXXXXXX-----      | CP1Ch3C4G5A6Phy7nig_Phyllostreta_nigripes_ChrysoT.idba.54_MERGED    |
| -XX-----XX-      | CP1Ch3C4G5A6Phy7tet  | XXXXXXXXXXXXX----   | CP1Ch3C4G5A6Phy7tet_Phyllostreta_tetrastigma_Chryso.idba.80  | XXXXXXXXXXXXX-XX-    | CP1Ch3C4G5A6Phy7tet_Phyllostreta_tetrastigma_Chryso.idba.80_MERGED  |
| -XX-----XX-      | CP1Ch3C4G5A6Phy7und  | XXXXXXXXXXXXX----   | CP1Ch3C4G5A6Phy7und_Phyllostreta_undulata_Chryso.idba.114    | XXXXXXXXXXXXX-XX-    | CP1Ch3C4G5A6Phy7und_Phyllostreta_undulata_Chryso.idba.114_MERGED    |
| --X-----XX-      | CP1Ch3C4G5A6Phy7var  | XXXXXXXXXXXXX----   | CP1Ch3C4G5A6Phy7var_Phyllostreta_variipennis_Chryso.idba.119 | XXXXXXXXXXXXX-XX-    | CP1Ch3C4G5A6Phy7var_Phyllostreta_variipennis_Chryso.idba.119_MERGED |
| --X-----XXX      | CP1Ch3C4G5A6Po7lut   | XXXXXXXXXXXXX----   | CP1Ch3C4G5A6Po7lut_Podontia_lutea_ChrysoT.idba.3             | XXXXXXXXXXXXX-XXX    | CP1Ch3C4G5A6Po7lut_Podontia_lutea_ChrysoT.idba.3_MERGED             |
| -XX-----X--XX-   | CP1Ch3C4G5A6Pod7fus  | --XXXXXXXXXXXXX---- | CP1Ch3C4G5A6Pod7fus_Podagrica_fuscipes_Chryso.idba.135       | --XXXXXXXXXXXXX-XX-  | CP1Ch3C4G5A6Pod7fus_Podagrica_fuscipes_Chryso.idba.135_MERGED       |
| -XX-----X--XXX-  | CP1Ch3C4G5A6Psy7chr  | XXXXXXXXXXXXX----   | CP1Ch3C4G5A6Psy7chr_Psylliodes_chrysocephalus_Chryso.idba.76 | XXXXXXXXXXXXX-XXX    | CP1Ch3C4G5A6Psy7chr_Psylliodes_chrysocephalus_Chryso.idba.76_MERGED |
| --X-----X--XXX-  | CP1Ch3C4G5A6Psy7cup  | XXXXXXXXXXXXX----   | CP1Ch3C4G5A6Psy7cup_Psylliodes_cupreatus_Chryso.idba.117     | XXXXXXXXXXXXX-XXX    | CP1Ch3C4G5A6Psy7cup_Psylliodes_cupreatus_Chryso.idba.117_MERGED     |
| --X-----X--XXX-  | CP1Ch3C4G5A6Psy7fus  | XXXXXXXXXXXXX----   | CP1Ch3C4G5A6Psy7fus_Psylliodes_fusiformis_Chryso.idba.0      | XXXXXXXXXXXXX-XXX    | CP1Ch3C4G5A6Psy7fus_Psylliodes_fusiformis_Chryso.idba.0_MERGED      |
| --X-----X--XXX-  | CP1Ch3C4G5A6Psy7gou  | XXXXXXXXXXXXX----   | CP1Ch3C4G5A6Psy7gou_Psylliodes_gougeleti_Chryso.idba.128     | XXXXXXXXXXXXX-XXX    | CP1Ch3C4G5A6Psy7gou_Psylliodes_gougeleti_Chryso.idba.128_MERGED     |
| --X-----X--XXX-  | CP1Ch3C4G5A6Psy7his  | XXXXXXXXXXXXX----   | CP1Ch3C4G5A6Psy7his_Psylliodes_hispnus_Chryso.idba.1         | XXXXXXXXXXXXX-XXX    | CP1Ch3C4G5A6Psy7his_Psylliodes_hispnus_Chryso.idba.1_MERGED         |
| --X-----X--XX-   | CP1Ch3C4G5A6Psy7lae  | --XXXXXXXXXXXXX---- | CP1Ch3C4G5A6Psy7lae_Psylliodes_laevicollis_Chryso.idba.129   | --XXXXXXXXXXXXX-XX-  | CP1Ch3C4G5A6Psy7lae_Psylliodes_laevicollis_Chryso.idba.129_MERGED   |
| -XX-----X--XX-   | CP1Ch3C4G5A6Psy7thl  | XXXXXXXXXXXXX----   | CP1Ch3C4G5A6Psy7thl_Psylliodes_thlasps_Chryso.idba.120       | XXXXXXXXXXXXX-XX-    | CP1Ch3C4G5A6Psy7thl_Psylliodes_thlasps_Chryso.idba.120_MERGED       |
| --X-----XXX      | CP1Ch3C4G5A6Si7ful   | XXXXXXXXXXXXX----   | CP1Ch3C4G5A6Si7ful_Sinocrepis_fulva_ChrysoT.idba.14          | XXXXXXXXXXXXX-XXX    | CP1Ch3C4G5A6Si7ful_Sinocrepis_fulva_ChrysoT.idba.14_MERGED          |
| -----X--XXX      | CP1Ch3C4G5A6Te7ker   | XXXXXXXXXXXXX----   | CP1Ch3C4G5A6Te7ker_Tegyrus_keralaensis_ChrysoT.idba.32       | XXXXXXXXXXXXX-XXX    | CP1Ch3C4G5A6Te7ker_Tegyrus_keralaensis_ChrysoT.idba.32_MERGED       |
| -XX-----X--XX-   | CP1Ch3C4G5G6Gal7int  | XXXXXXXXXXXXX----   | CP1Ch3C4G5G6Gal7int_Galeruca_interrupta_Chryso.idba.33       | XXXXXXXXXXXXX-XX-    | CP1Ch3C4G5G6Gal7int_Galeruca_interrupta_Chryso.idba.33_MERGED       |
| --X-----XX-      | CP1Ch3C4G5G6Gal7mac  | XXXXXXXXXXXXX----   | CP1Ch3C4G5G6Gal7mac_Galeruca_macchoi_Chryso.idba.28          | XXXXXXXXXXXXX-XX-    | CP1Ch3C4G5G6Gal7mac_Galeruca_macchoi_Chryso.idba.28_MERGED          |
| -XX-----X--X---- | CP1Ch3C4G5G6Gal7nig  | XXXXXXXXXXXXX----   | CP1Ch3C4G5G6Gal7nig_Galeruca_nigrolineata_ChrysoT.idba.33    | XXXXXXXXXXXXX----    | CP1Ch3C4G5G6Gal7nig_Galeruca_nigrolineata_ChrysoT.idba.33_MERGED    |
| -X-----XXX       | CP1Ch3C4G5G6Is7dim   | XXXXXXXXXXXXX----   | CP1Ch3C4G5G6Is7dim_Isshikia_dimidiaticornis_ChrysoT.idba.28  | XXXXXXXXXXXXX-XXX    | CP1Ch3C4G5G6Is7dim_Isshikia_dimidiaticornis_ChrysoT.idba.28_MERGED  |
| --X-----X--XXX   | CP1Ch3C4G5G6Pe7vig   | XXXXXXXX-----       | CP1Ch3C4G5G6Pe7vig_Periclitena_vigorsi_ChrysoT.idba.66       | XXXXXX-----X--XXX    | CP1Ch3C4G5G6Pe7vig_Periclitena_vigorsi_ChrysoT.idba.66_MERGED       |
| -XX-----XX-      | CP1Ch3C4G5G6Py7aen   | XXXXXXXXXXXXX----   | CP1Ch3C4G5G6Py7aen_Pyrrhalta_aenescens_ChrysoT.idba.17       | XXXXXXXXXXXXX----    | CP1Ch3C4G5G6Py7aen_Pyrrhalta_aenescens_ChrysoT.idba.17_MERGED       |
| -X-----XXX-XXX   | CP1Ch3C4G5G6Tr7vir   | XXXXXXXX-----       | CP1Ch3C4G5G6Tr7vir_Trirhabda_virgata_ChrysoT.idba.57         | XXXXXXXX-----XXX-XXX | CP1Ch3C4G5G6Tr7vir_Trirhabda_virgata_ChrysoT.idba.57_MERGED         |
| --X-----X--XXX   | CP1Ch3C4G5L6Ag7mir   | XXXXXXXXXXXXX----   | CP1Ch3C4G5L6Ag7mir_Agetocera_mirabilis_CS.idba.48            | XXXXXXXXXXXXX-XXX    | CP1Ch3C4G5L6Ag7mir_Agetocera_mirabilis_CS.idba.48_MERGED            |
| -XX-----XX-XXX   | CP1Ch3C4G5L6Ca7cir   | XXXXXXXX-----       | CP1Ch3C4G5L6Ca7cir_Calomacrus_circumfusus_Chryso.idba.139    | XXXXXXXXXX--XX-XXX   | CP1Ch3C4G5L6Ca7cir_Calomacrus_circumfusus_Chryso.idba.139_MERGED    |
| -X-----XX-XXX    | CP1Ch3C4G5L6Ca7pin   | XXXXXXXX-----       | CP1Ch3C4G5L6Ca7pin_Calomacrus_pinicola_amie.idba.64          | XXXXXXXX-----        | CP1Ch3C4G5L6Ca7pin_Calomacrus_pinicola_amie.idba.64_MERGED          |
| -----XX-         | CP1Ch3C4G5L6Ca7sut   | XXXXXXXXXXXXX----   | CP1Ch3C4G5L6Ca7sut_Calomacrus_suturalis_Chryso.idba.22       | XXXXXXXXXXXXX-XX-    | CP1Ch3C4G5L6Ca7sut_Calomacrus_suturalis_Chryso.idba.22_MERGED       |
| XXXXXXXXXXXXXXXX | CP1Ch3C4G5L6Dia7bar  | XXXXXXXXXXXXX----   | CP1Ch3C4G5L6Dia7bar_Diabrotica_barberi_NC_022935             | XXXXXXXXXXXXX-XXX    | CP1Ch3C4G5L6Dia7bar_Diabrotica_barberi_NC_022935_MERGED             |
| XXXXXXXXXXXXXXXX | CP1Ch3C4G5L6Dia7vir  | XXXXXXXXXXXXX----   | CP1Ch3C4G5L6Dia7vir_Diabrotica_virgifera_KF658070            | XXXXXXXXXXXXX----    | CP1Ch3C4G5L6Dia7vir_Diabrotica_virgifera_KF658070_MERGED            |
| -X-----XX-XXX    | CP1Ch3C4G5L6Ex7lus   | XXXXXXXXXXXXX----   | CP1Ch3C4G5L6Ex7lus_Exosoma_lusitanicum_Chryso.idba.116       | XXXXXXXXXXXXX-XXX    | CP1Ch3C4G5L6Ex7lus_Exosoma_lusitanicum_Chryso.idba.116_MERGED       |
| -----XX-XXX      | CP1Ch3C4G5L6Ho7uni   | XXXXXXXX-----       | CP1Ch3C4G5L6Ho7uni_Hoplasoma_unicolor_ChrysoT.idba.50        | XXXXXXXXXXXXX-XXX    | CP1Ch3C4G5L6Ho7uni_Hoplasoma_unicolor_ChrysoT.idba.50_MERGED        |
| --X-----X--XXX   | CP1Ch3C4G5L6Hop7sub  | XXXXXXXXXXXXX----   | CP1Ch3C4G5L6Hop7sub_Hoplosaenidea_subcostata_ChrysoT.idba.41 | XXXXXXXXXXXXX-XXX    | CP1Ch3C4G5L6Hop7sub_Hoplosaenidea_subcostata_ChrysoT.idba.41_MERGED |
| -X-----XX-       | CP1Ch3C4G5L6Lep7ery  | XXXXXXXXXXXXX----   | CP1Ch3C4G5L6Lep7ery_Leptomoma_erythrocephala_Chryso.idba.46  | XXXXXXXXXXXXX-XX-    | CP1Ch3C4G5L6Lep7ery_Leptomoma_erythrocephala_Chryso.idba.46_MERGED  |
| -XX-----X--XX-   | CP1Ch3C4G5L6Ph7qua   | XXXXXXXXXXXXX----   | CP1Ch3C4G5L6Ph7qua_Phyllobrotica_quadrimaculata_amie.idba.53 | XXXXXXXXXXXXX-XXX    | CP1Ch3C4G5L6Ph7qua_Phyllobrotica_quadrimaculata_amie.idba.53_MERGED |
| -X-----XX-       | CP1Ch3C4G5L6St7nip   | XXXXXXXXXXXXX----   | CP1Ch3C4G5L6St7nip_Stenoluperus_nipponensis_ChrysoT.idba.29  | XXXXXXXXXXXXX----    | CP1Ch3C4G5L6St7nip_Stenoluperus_nipponensis_ChrysoT.idba.29_MERGED  |
| -X--X-----X----- | CP1Ch3C4G5O6o17mac   | XXXXXXXXXXXXX----   | CP1Ch3C4G5O6o17mac_Oides_maculatus_ChrysoT.idba.45           | XXXXXXXXXXXXX----    | CP1Ch3C4G5O6o17mac_Oides_maculatus_ChrysoT.idba.45_MERGED           |
| --X-----X--XXX   | CP1Ch3C4G5Op7sca     | XXXXXXXX-----       | CP1Ch3C4G5Op7sca_Ophrida_scapoides_CS.idba.69                | XXXXXXXX-----X--XXX  | CP1Ch3C4G5Op7sca_Ophrida_scapoides_CS.idba.69_MERGED                |
| -X-----X--XXX    | CP1Ch3C4G5Par7fla    | XXXXXXXXXXXXX----   | CP1Ch3C4G5Par7fla_Paragetocera_favipes_ChrysoT.idba.24       | XXXXXXXXXXXXX-XXX    | CP1Ch3C4G5Par7fla_Paragetocera_favipes_ChrysoT.idba.24_MERGED       |
| -XX-----X--XXXX- | CP1Ch3C4G5S6Age7aln  | XXXXXXXX-----       | CP1Ch3C4G5S6Age7aln_Agelastica_alni_CS.idba.57               | XXXXXXXXXX--X-XXXX-  | CP1Ch3C4G5S6Age7aln_Agelastica_alni_CS.idba.57_MERGED               |
| -----XXX         | CP1Ch3C4G5S6Ar7chi   | XXXXXXXXXXXXX----   | CP1Ch3C4G5S6Ar7chi_Arthrotus_chinensis_CS.idba.16            | XXXXXXXXXXXXX-XXX    | CP1Ch3C4G5S6Ar7chi_Arthrotus_chinensis_CS.idba.16_MERGED            |
| -XX-----XXXXXX   | CP1Ch3C4G5S6Se7hal   | XXXXXXXXXXXXX----   | CP1Ch3C4G5S6Se7hal_Sermylassa_halensis_ChrysoT.idba.11       | XXXXXXXXXXXXXXXXXXXX | CP1Ch3C4G5S6Se7hal_Sermylassa_halensis_ChrysoT.idba.11_MERGED       |
| -X-----X--XXX    | CP1Ch3C4G5S17sub     | XXXXXXXXXXXXX----   | CP1Ch3C4G5S17sub_Sinoluperus_subcostatus_ChrysoT.idba.44     | XXXXXXXXXXXXX-XXX    | CP1Ch3C4G5S17sub_Sinoluperus_subcostatus_ChrysoT.idba.44_MERGED     |
| -XX-----X--XX-   | CP1Ch3C4G5S7rub      | XXXXXXXXXXXXX----   | CP1Ch3C4G5S7rub_Sphaeroderma_rubidum_Chryso.idba.27          | XXXXXXXXXXXXX-XX-    | CP1Ch3C4G5S7rub_Sphaeroderma_rubidum_Chryso.idba.27_MERGED          |
| -XX-----XXXXXX   | CP1Ch3C4P17ser       | XXXXXXXXXXXXX----   | CP1Ch3C4P17ser_Plateumaris_sericea_Chryso.idba.118           | XXXXXXXXXXXXXXXXXXXX | CP1Ch3C4P17ser_Plateumaris_sericea_Chryso.idba.118_MERGED           |
| -X-----XX-XXX    | CP1Ch3C4S5Sp7sum     | --XXXXXXXX-----     | CP1Ch3C4S5Sp7sum_Spilopyra_sumptuosa_JX220997                | --XXXXXXXX-----XXX   | CP1Ch3C4S5Sp7sum_Spilopyra_sumptuosa_JX220997_MERGED                |

|            |                        |             |                                                                      |             |                                                                             |
|------------|------------------------|-------------|----------------------------------------------------------------------|-------------|-----------------------------------------------------------------------------|
| -X-----    | CP1Ch3Ce4C5Ca6Py7san   | XXXXXXXXXX  | CP1Ch3Ce4C5Ca6Py7san_Pyrrhidium_sanguineum_amei.idba.43              | XXXXXXXXXX  | CP1Ch3Ce4C5Ca6Py7san_Pyrrhidium_sanguineum_amei.idba.43_MERGED              |
| XXXXXXXXXX | CP1Ch3Ce4C5Ce6Ma7rad   | XXXXXXXXXX  | CP1Ch3Ce4C5Ce6Ma7rad_Massicus_raddei_NC_023937                       | XXXXXXXXXX  | CP1Ch3Ce4C5Ce6Ma7rad_Massicus_raddei_NC_023937_MERGED                       |
| -X-----    | CP1Ch3Ce4L5L6Cort7hum  | XXXXXXXXXX  | CP1Ch3Ce4L5L6Cort7hum_Cortodera_humeralis_amei.idba.52               | XXXXXXXXXX  | CP1Ch3Ce4L5L6Cort7hum_Cortodera_humeralis_amei.idba.52_MERGED               |
| -XX-----   | CP1Ch3Ce4L5L6St7nig    | XXXXXXXXXX  | CP1Ch3Ce4L5L6St7nig_Stenurella_nigra_amei.idba.31                    | XXXXXXXXXX  | CP1Ch3Ce4L5L6St7nig_Stenurella_nigra_amei.idba.31_MERGED                    |
| -X-----    | CP1Ch3Ce4L5L6St7sep    | XXXXXXXXXX  | CP1Ch3Ce4L5L6St7sep_Stenurella_septempunctata_amei.idba.16           | XXXXXXXXXX  | CP1Ch3Ce4L5L6St7sep_Stenurella_septempunctata_amei.idba.16_MERGED           |
| -X-----    | CP1Ch3Ce4L5R6Br7int    | XXXXXXXXXX  | CP1Ch3Ce4L5R6Br7int_Brachyta_interrogationis_amei.idba.3             | XXXXXXXXXX  | CP1Ch3Ce4L5R6Br7int_Brachyta_interrogationis_amei.idba.3_MERGED             |
| -XX-----   | CP1Ch3Ce4L5R6Rh7mor    | XXXXXXXXXX  | CP1Ch3Ce4L5R6Rh7mor_Rhagium_mordax_JX412743                          | XXXXXXXXXX  | CP1Ch3Ce4L5R6Rh7mor_Rhagium_mordax_JX412743_MERGED                          |
| XXXXXXXXXX | CP1Ch3Ce4La5Agn6Ps7hil | XXXXXXXXXX  | CP1Ch3Ce4La5Agn6Ps7hil_Psacotheta_hilaris_NC_013070                  | XXXXXXXXXX  | CP1Ch3Ce4La5Agn6Ps7hil_Psacotheta_hilaris_NC_013070_MERGED                  |
| XXXXXXXXXX | CP1Ch3Ce4La5B6Ba7lin   | XXXXXXXXXX  | CP1Ch3Ce4La5B6Ba7lin_Batocera_lineolata_NC_022671                    | XXXXXXXXXX  | CP1Ch3Ce4La5B6Ba7lin_Batocera_lineolata_NC_022671_MERGED                    |
| XXXXXXXXXX | CP1Ch3Ce4La5L6An7gla   | XXXXXXXXXX  | CP1Ch3Ce4La5L6An7gla_Anoplophora_glabripennis_NC_008221              | XXXXXXXXXX  | CP1Ch3Ce4La5L6An7gla_Anoplophora_glabripennis_NC_008221_MERGED              |
| XXXXXXXXXX | CP1Ch3Ce4La5Mo6Mo7alt  | XXXXXXXXXX  | CP1Ch3Ce4La5Mo6Mo7alt_Monochamus_alternatus_NC_024652                | XXXXXXXXXX  | CP1Ch3Ce4La5Mo6Mo7alt_Monochamus_alternatus_NC_024652_MERGED                |
| -XX-----   | CP1Ch3Ce4N5N6Ne7u1m    | XXXXXXXXXX  | CP1Ch3Ce4N5N6Ne7u1m_Necydalis_ulmi_JX220989                          | XXXXXXXXXX  | CP1Ch3Ce4N5N6Ne7u1m_Necydalis_ulmi_JX220989_MERGED                          |
| -X-----    | CP1Ch3040r7cer         | XXXXXXXXXX  | CP1Ch3040r7cer_Orsodacne_cerasi_amei.idba.18                         | XXXXXXXXXX  | CP1Ch3040r7cer_Orsodacne_cerasi_amei.idba.18_MERGED                         |
| -X-----    | CP1Ch3040r7lin         | XXXXXXXXXX  | CP1Ch3040r7lin_Orsodacne_lineola_JX220994                            | XXXXXXXXXX  | CP1Ch3040r7lin_Orsodacne_lineola_JX220994_MERGED                            |
| -XX-----   | CP1Cu3B4By7och         | XXXXXXXXXX  | CP1Cu3B4By7och_Byturus_ochraceus_677381_idba_contig_12               | XXXXXXXXXX  | CP1Cu3B4By7och_Byturus_ochraceus_677381_idba_contig_12_MERGED               |
| -X-----    | CP1Cu3Bot4An7duo       | XXXXXXXXXX  | CP1Cu3Bot4An7duo_Anommatus_duodecimstriatus_Soil.idba.105            | XXXXXXXXXX  | CP1Cu3Bot4An7duo_Anommatus_duodecimstriatus_Soil.idba.105_MERGED            |
| XXXXXXXXXX | CP1Cu3Bot4Da7hel       | XXXXXXXXXX  | CP1Cu3Bot4Da7hel_Dastarcus_helophoroides_NC_024271                   | XXXXXXXXXX  | CP1Cu3Bot4Da7hel_Dastarcus_helophoroides_NC_024271_MERGED                   |
| -XX-----   | CP1Cu3Bot4Te7cyl       | XXXXXXXXXX  | CP1Cu3Bot4Te7cyl_Teredus_cylindricus_amei.idba.176                   | XXXXXXXXXX  | CP1Cu3Bot4Te7cyl_Teredus_cylindricus_amei.idba.176_MERGED                   |
| -XX-----   | CP1Cu3C4C5Ad7dec       | XXXXXXXXXX  | CP1Cu3C4C5Ad7dec_Adalia_decempunctata_BIUK.idba.56                   | XXXXXXXXXX  | CP1Cu3C4C5Ad7dec_Adalia_decempunctata_BIUK.idba.56_MERGED                   |
| -XX-----   | CP1Cu3C4C5An7nov       | XXXXXXXXXX  | CP1Cu3C4C5An7nov_Anisosticta_novemdecimpunctata_2VGB.idba.9          | XXXXXXXXXX  | CP1Cu3C4C5An7nov_Anisosticta_novemdecimpunctata_2VGB.idba.9_MERGED          |
| -X-----    | CP1Cu3C4C5Ana7oce      | XXXXXXXXXX  | CP1Cu3C4C5Ana7oce_Anatis_ocellata_833044_idba_contig_22              | XXXXXXXXXX  | CP1Cu3C4C5Ana7oce_Anatis_ocellata_833044_idba_contig_22_MERGED              |
| -X-----    | CP1Cu3C4C5Ca7dec       | XXXXXXXXXX  | CP1Cu3C4C5Ca7dec_Calvia_decempunctata_amei.idba.50                   | XXXXXXXXXX  | CP1Cu3C4C5Ca7dec_Calvia_decempunctata_amei.idba.50_MERGED                   |
| -XXXXXXXX  | CP1Cu3C4C5Ch7sex       | XXXXXXXXXX  | CP1Cu3C4C5Ch7sex_Cheilomenes_sexmaculata_KM244706                    | XXXXXXXXXX  | CP1Cu3C4C5Ch7sex_Cheilomenes_sexmaculata_KM244706_MERGED                    |
| -X-----    | CP1Cu3C4C5Co7mag       | XXXXXXXXXX  | CP1Cu3C4C5Co7mag_Coccinella_magnifica_amei.idba.0                    | XXXXXXXXXX  | CP1Cu3C4C5Co7mag_Coccinella_magnifica_amei.idba.0_MERGED                    |
| -XX-----   | CP1Cu3C4C5Ha7qua       | XXXXXXXXXX  | CP1Cu3C4C5Ha7qua_Harmonia_quadripunctata_amei.idba.4                 | XXXXXXXXXX  | CP1Cu3C4C5Ha7qua_Harmonia_quadripunctata_amei.idba.4_MERGED                 |
| -XX-----   | CP1Cu3C4C5Hal7sed      | XXXXXXXXXX  | CP1Cu3C4C5Hal7sed_Halyzia_sedecimguttata_Staph.idba.68               | XXXXXXXXXX  | CP1Cu3C4C5Hal7sed_Halyzia_sedecimguttata_Staph.idba.68_MERGED               |
| -X-----    | CP1Cu3C4C5Hi7und       | XXXXXXXXXX  | CP1Cu3C4C5Hi7und_Hippodamia_undecimnotata_amei.idba.26               | XXXXXXXXXX  | CP1Cu3C4C5Hi7und_Hippodamia_undecimnotata_amei.idba.26_MERGED               |
| -XXXXXXXX  | CP1Cu3C4C5Pr7jap       | XXXXXXXXXX  | CP1Cu3C4C5Pr7jap_Propylea_japonica_KM244660                          | XXXXXXXXXX  | CP1Cu3C4C5Pr7jap_Propylea_japonica_KM244660_MERGED                          |
| -XX-----   | CP1Cu3C4Co5Co7ruf      | XXXXXXXXXX  | CP1Cu3C4Co5Co7ruf_Coccidula_rufa_JX412767                            | XXXXXXXXXX  | CP1Cu3C4Co5Co7ruf_Coccidula_rufa_JX412767_MERGED                            |
| XXXXXXXXXX | CP1Cu3C4E5E6He7pusi    | XXXXXXXXXX  | CP1Cu3C4E5E6He7pusi_Henosepilachna_pusillanima_NC_023469             | XXXXXXXXXX  | CP1Cu3C4E5E6He7pusi_Henosepilachna_pusillanima_NC_023469_MERGED             |
| -XX-----   | CP1Cu3C4E5E6Su7vig     | XXXXXXXXXX  | CP1Cu3C4E5E6Su7vig_Suboccinella_vigintiquatuorpunctata_Staph.idba.64 | XXXXXXXXXX  | CP1Cu3C4E5E6Su7vig_Suboccinella_vigintiquatuorpunctata_Staph.idba.64_MERGED |
| -XX-----   | CP1Cu3Ce4Ce7his        | XXXXX-X-XXX | CP1Cu3Ce4Ce7his_Cerylon_histeroides_HQ232821                         | XXXXX-X-XXX | CP1Cu3Ce4Ce7his_Cerylon_histeroides_HQ232821_MERGED                         |
| -XX-----   | CP1Cu3Cr4Cr7pil        | XXXXXXXXXX  | CP1Cu3Cr4Cr7pil_Cryptophagus_pilosus_Soil.idba.15                    | XXXXXXXXXX  | CP1Cu3Cr4Cr7pil_Cryptophagus_pilosus_Soil.idba.15_MERGED                    |
| -X-----    | CP1Cu3Cr4Mi7vil        | XXXXXXXXXX  | CP1Cu3Cr4Mi7vil_Micrambe_villosus_amei.idba.34                       | XXXXXXXXXX  | CP1Cu3Cr4Mi7vil_Micrambe_villosus_amei.idba.34_MERGED                       |
| XXXXXXXXXX | CP1Cu3Cu4Cu7cla        | XXXXXXXXXX  | CP1Cu3Cu4Cu7cla_Cucujus_clavipes_NC_018350                           | XXXXXXXXXX  | CP1Cu3Cu4Cu7cla_Cucujus_clavipes_NC_018350_MERGED                           |
| -X-----    | CP1Cu3Cu4Cu7hae        | XXXXXXXXXX  | CP1Cu3Cu4Cu7hae_Cucujus_haematodes_amei.idba.42                      | XXXXXXXXXX  | CP1Cu3Cu4Cu7hae_Cucujus_haematodes_amei.idba.42_MERGED                      |
| -XX-----   | CP1Cu3E4Tr7bip         | XXXX-XXXX   | CP1Cu3E4Tr7bip_Tritoma_bipustulata_HQ232822                          | XXXX-XXXX   | CP1Cu3E4Tr7bip_Tritoma_bipustulata_HQ232822_MERGED                          |
| -XX-----   | CP1Cu3En4End7coc       | --XXXXXXXX  | CP1Cu3En4End7coc_Endomychus_coccineus_JX313667                       | XXXXXXXXXX  | CP1Cu3En4End7coc_Endomychus_coccineus_JX313667_MERGED                       |
| -X-----    | CP1Cu3K4Bra7ves        | XXXXXXXXXX  | CP1Cu3K4Bra7ves_Brachypterolus_vestitus_amei.idba.107                | XXXXXXXXXX  | CP1Cu3K4Bra7ves_Brachypterolus_vestitus_amei.idba.107_MERGED                |
| -XX-----   | CP1Cu3K4Ka7ped         | -----XXXX   | CP1Cu3K4Ka7ped_Kateretes_pedicularius_amei.idba.175                  | -X-----     | CP1Cu3K4Ka7ped_Kateretes_pedicularius_amei.idba.175_MERGED                  |
| -XXX-----  | CP1Cu3Lat4Ca7nod       | XXXXXXXXXX  | CP1Cu3Lat4Ca7nod_Cartodere_nodifer_BIUK.idba.51                      | XXXXXXXXXX  | CP1Cu3Lat4Ca7nod_Cartodere_nodifer_BIUK.idba.51_MERGED                      |
| -XX-----   | CP1Cu3Lat4Co7gib       | XXXXXXXXXX  | CP1Cu3Lat4Co7gib_Corticinara_gibbosa_BIUK.idba.27                    | XXXXXXXXXX  | CP1Cu3Lat4Co7gib_Corticinara_gibbosa_BIUK.idba.27_MERGED                    |
| -XX-----   | CP1Cu3Lat4Cor7sim      | XXXXXXXXXX  | CP1Cu3Lat4Cor7sim_Corticarina_similata_BIUK.idba.1a                  | XXXXXXXXXX  | CP1Cu3Lat4Cor7sim_Corticarina_similata_BIUK.idba.1a_MERGED                  |
| -X-----    | CP1Cu3Lat4En7bre       | --XXXXXXXX  | CP1Cu3Lat4En7bre_Enicmus_brevicornis_JX313681                        | XXXXXXXXXX  | CP1Cu3Lat4En7bre_Enicmus_brevicornis_JX313681_MERGED                        |
| -X-----    | CP1Cu3M4M5Mo7qua       | XXXXXXXXXX  | CP1Cu3M4M5Mo7qua_Monotoma_quadricollis_676892_idba_contig_27-86      | XXXXXXXXXX  | CP1Cu3M4M5Mo7qua_Monotoma_quadricollis_676892_idba_contig_27-86_MERGED      |
| -X-----    | CP1Cu3M4R5Rh7aen       | XXXXXXXXXX  | CP1Cu3M4R5Rh7aen_Rhizophagus_aeneus_amei.idba.45                     | XXXXXXXXXX  | CP1Cu3M4R5Rh7aen_Rhizophagus_aeneus_amei.idba.45_MERGED                     |
| -XX-----   | CP1Cu3M4R5Rh7dis       | XXXX-XXXX   | CP1Cu3M4R5Rh7dis_Rhizophagus_dispr_676912_idba_contig_113            | XXXX-XXXX   | CP1Cu3M4R5Rh7dis_Rhizophagus_dispr_676912_idba_contig_113_MERGED            |
| -XX-----   | CP1Cu3N4C5Ep7me1       | XXXXXXXXXX  | CP1Cu3N4C5Ep7me1_Epuraea_melanocephala_BIUK.idba.43                  | XXXXXXXXXX  | CP1Cu3N4C5Ep7me1_Epuraea_melanocephala_BIUK.idba.43_MERGED                  |
| -XX-----   | CP1Cu3N4Cr5G17hor      | --XXXXXXXX  | CP1Cu3N4Cr5G17hor_Glischrochilus_hortensis_JX412778                  | XXXXXXXXXX  | CP1Cu3N4Cr5G17hor_Glischrochilus_hortensis_JX412778_MERGED                  |
| -XX-----   | CP1Cu3N4N5Po7adu       | XXXXXXXXXX  | CP1Cu3N4N5Po7adu_Pocadius_ajustus_BIUK.idba.12                       | XXXXXXXXXX  | CP1Cu3N4N5Po7adu_Pocadius_ajustus_BIUK.idba.12_MERGED                       |
| -XX-----   | CP1Cu3P4Er7syl         | XXX         | CP1Cu3P4Er7syl_Ericmodes_sylvaticus_697044_idba_contig_61            | XXX         | CP1Cu3P4Er7syl_Ericmodes_sylvaticus_697044_idba_contig_61_MERGED            |
| XXXXXXXXXX | CP1Cu3Ph4Pr7obs        | XXXXXXXXXX  | CP1Cu3Ph4Pr7obs_Priasilpha_obscura_NC_011326                         | XXXXXXXXXX  | CP1Cu3Ph4Pr7obs_Priasilpha_obscura_NC_011326_MERGED                         |
| -XX-----   | CP1Cu3S4As7orb         | XXXXXXXXXX  | CP1Cu3S4As7orb_Aspidiphorus_orbiculatus_Staph.idba.13                | XXXXXXXXXX  | CP1Cu3S4As7orb_Aspidiphorus_orbiculatus_Staph.idba.13_MERGED                |
| -XX-----   | CP1Cu3S4Sp7dub         | --XXXXXXXX  | CP1Cu3S4Sp7dub_Sphindus_dubius_JX412803                              | XXXXXXXXXX  | CP1Cu3S4Sp7dub_Sphindus_dubius_JX412803_MERGED                              |
| -X-----    | CP1Cu3S14S50r7sur      | XXXXXXXXXX  | CP1Cu3S14S50r7sur_Oryzaephilus_surinamensis_Soil.idba.57             | XXXXXXXXXX  | CP1Cu3S14S50r7sur_Oryzaephilus_surinamensis_Soil.idba.57_MERGED             |

|                   |                         |                        |                                                            |                        |                                                                   |
|-------------------|-------------------------|------------------------|------------------------------------------------------------|------------------------|-------------------------------------------------------------------|
| -XX-----XX-XXX    | CP1Cu3S14S5S17uni       | -----XXXXX-----        | CP1Cu3S14S5S17uni_Silvanus_unidentatus_JX313687            | -X-XXX-XXXXX-XXX       | CP1Cu3S14S5S17uni_Silvanus_unidentatus_JX313687_MERGED            |
| -XX-----X--XX-    | CP1Cur3A4A5P6P17alb     | --XXXXXXXXX-----       | CP1Cur3A4A5P6P17alb_Platystomos_albinus_JN163968           | -XXXXXXXXXXXX--XX-     | CP1Cur3A4A5P6P17alb_Platystomos_albinus_JN163968_MERGED           |
| -XX-----XX-       | CP1Cur3AT4A5AT7nit      | XXXXXXXXXXXXX-----     | CP1Cur3AT4A5AT7nit_AtteLabus_nitens_ameie.idba.73          | XXXXXXXXXXXXX-----XX-  | CP1Cur3AT4A5AT7nit_AtteLabus_nitens_ameie.idba.73_MERGED          |
| -X-----X-----     | CP1Cur3AT4A5P7cor       | -XXXXXXXXXXXXX-----    | CP1Cur3AT4A5P7cor_Apoderus_coryli_JN163966                 | -XXXXXXXXXXXXX-----    | CP1Cur3AT4A5P7cor_Apoderus_coryli_JN163966_MERGED                 |
| -X-----X-----     | CP1Cur3AT4R5B7pop       | --XXXXXXXXX-----       | CP1Cur3AT4R5B7pop_Byctiscus_populi_NC_018760               | -X-XXXXXXXX-----       | CP1Cur3AT4R5B7pop_Byctiscus_populi_NC_018760_MERGED               |
| -X-----XX-        | CP1Cur3AT4R5De7bet      | --XXXXXXXXXXXXX-----   | CP1Cur3AT4R5De7bet_Deporaus_betulae_JN163945               | -XXXXXXXXXXXXX-----XX- | CP1Cur3AT4R5De7bet_Deporaus_betulae_JN163945_MERGED               |
| -X-----X-----     | CP1Cur3AT4R5De7tri      | XXXXXXXXXXXXX-----     | CP1Cur3AT4R5De7tri_Deporaus_tristis_ameie.idba.109         | XXXXXXXXXXXXX-----     | CP1Cur3AT4R5De7tri_Deporaus_tristis_ameie.idba.109_MERGED         |
| -XX-----X--XX-    | CP1Cur3Br4A5Be7sim      | XXXXXXXXXXXXXXXXX----- | CP1Cur3Br4A5Be7sim_Betulapion_simile_BIUK.idba.36          | XXXXXXXXXXXXXXXXX-XX-  | CP1Cur3Br4A5Be7sim_Betulapion_simile_BIUK.idba.36_MERGED          |
| -X-----X-----     | CP1Cur3Br4A5Pr7int      | XXXXXXXXXXXXX-----     | CP1Cur3Br4A5Pr7int_Protapion_interjectum_Soil.idba.118     | XXXXXXXXXXXXX-----     | CP1Cur3Br4A5Pr7int_Protapion_interjectum_Soil.idba.118_MERGED     |
| -XX-----X-----    | CP1Cur3Br4A5Pr7tri      | XXXXXXXXXXXXXXXXX----- | CP1Cur3Br4A5Pr7tri_Protapion_trifolii_Soil.idba.58         | XXXXXXXXXXXXXXXXX----  | CP1Cur3Br4A5Pr7tri_Protapion_trifolii_Soil.idba.58_MERGED         |
| -X-----XX-        | CP1Cur3Br4A5Rh7lon      | --XXXXXXXXXXXXX-----   | CP1Cur3Br4A5Rh7lon_Rhopalapion_longirostre_JN163967        | -XXXXXXXXXXXXX-----    | CP1Cur3Br4A5Rh7lon_Rhopalapion_longirostre_JN163967_MERGED        |
| -XX-----X--XX-    | CP1Cur3Br4N5Na7mar      | -----XXXXXXXXX-----    | CP1Cur3Br4N5Na7mar_Nanophyes_marmoratus_Curc.idba.93       | -X-XXXXXXXXXXXX-XX-    | CP1Cur3Br4N5Na7mar_Nanophyes_marmoratus_Curc.idba.93_MERGED       |
| -----XX-          | CP1Cur3Bra4B5Br7mur     | --XXXXXXXXXXXXX-----   | CP1Cur3Bra4B5Br7mur_Brachycerus_muricatus_JN163970         | --XXXXXXXXXXXX-XX-     | CP1Cur3Bra4B5Br7mur_Brachycerus_muricatus_JN163970_MERGED         |
| -X-----XXX        | CP1Cur3Bra4B5Ha7DDM2009 | -----XXXXXXXXX-----    | CP1Cur3Bra4B5Ha7DDM2009_Haplonyx_spDDM-2009_Curc.idba.98   | -X-----XXXXXXXX-XXX    | CP1Cur3Bra4B5Ha7DDM2009_Haplonyx_spDDM-2009_Curc.idba.98_MERGED   |
| -X-----X-----     | CP1Cur3Bra4E5Do7tor     | XXXXXXXXXXXXX-----     | CP1Cur3Bra4E5Do7tor_Dorytomus_tortrix_ameie.idba.139       | XXXXXXXXXXXXX-----     | CP1Cur3Bra4E5Do7tor_Dorytomus_tortrix_ameie.idba.139_MERGED       |
| -XX-----X--X-     | CP1Cur3C4C5A6An7pom     | --XXXXXXXXXXXXX-----   | CP1Cur3C4C5A6An7pom_Anthonomus_pomorum_JN163951            | -XXXXXXXXXXXX-XX-      | CP1Cur3C4C5A6An7pom_Anthonomus_pomorum_JN163951_MERGED            |
| -X-----X-----     | CP1Cur3C4C5A6Bra7kel    | XXXXXXXXXXXXX-----     | CP1Cur3C4C5A6Bra7kel_Bradybatus_kellneri_ameie.idba.54     | XXXXXXXXXXXXX-----     | CP1Cur3C4C5A6Bra7kel_Bradybatus_kellneri_ameie.idba.54_MERGED     |
| -XX-----X--X-     | CP1Cur3C4C5C6Cu7ele     | XXXXXXXXXXXXX-----     | CP1Cur3C4C5C6Cu7ele_Curculio_elephas_ameie.idba.5          | XXXXXXXXXXXXX-XX-      | CP1Cur3C4C5C6Cu7ele_Curculio_elephas_ameie.idba.5_MERGED          |
| -X-----X-X-XXX-   | CP1Cur3C4C5C6Cu7gla     | -----XXXXXXXXX-----    | CP1Cur3C4C5C6Cu7gla_Curculio_glandium_BIUK.idba.52         | -X-XXXXXXXXXXXXX-XX-   | CP1Cur3C4C5C6Cu7gla_Curculio_glandium_BIUK.idba.52_MERGED         |
| -----X-X--X-      | CP1Cur3C4C5Eu6An7tar    | XXXXXXXXXXXXXXXXX----- | CP1Cur3C4C5Eu6An7tar_Ancyrtalia_tarsalis_Curc.idba.45      | XXXXXXXXXXXXXXXXX-XX-  | CP1Cur3C4C5Eu6An7tar_Ancyrtalia_tarsalis_Curc.idba.45_MERGED      |
| -X-X-----X-----   | CP1Cur3C4C5M6Me7jan     | --XXXXXXXXX-----       | CP1Cur3C4C5M6Me7jan_Mecinus_janthinus_ameie.idba.143       | -XXXXXXXX-----         | CP1Cur3C4C5M6Me7jan_Mecinus_janthinus_ameie.idba.143_MERGED       |
| -XX-----X-----    | CP1Cur3C4Ce5Ce7obs      | --XXXXXXXXXXXXX-----   | CP1Cur3C4Ce5Ce7obs_Ceutorhynchus_obstrictus_JN163956       | -XXXXXXXXXXXX-XX-      | CP1Cur3C4Ce5Ce7obs_Ceutorhynchus_obstrictus_JN163956_MERGED       |
| -X-----X-----     | CP1Cur3C4Ce5Mon7pun     | XXXXXXXXXXXXXXXXX----- | CP1Cur3C4Ce5Mon7pun_Mononychus_punctumalbum_Curc.idba.3    | XXXXXXXXXXXXXXXXX----  | CP1Cur3C4Ce5Mon7pun_Mononychus_punctumalbum_Curc.idba.3_MERGED    |
| -XX-----X-----    | CP1Cur3C4Ce5Rh7per      | XXXXXXXXXXXXXXXXX----- | CP1Cur3C4Ce5Rh7per_Rhinoncus_pericarpus_Curc.idba.24       | XXXXXXXXXXXXXXXXX----  | CP1Cur3C4Ce5Rh7per_Rhinoncus_pericarpus_Curc.idba.24_MERGED       |
| -X-----X--X-      | CP1Cur3C4C15C17ole      | --XXXXXXXXXXXXX-----   | CP1Cur3C4C15C17ole_Cionus_olens_JN163958                   | -XXXXXXXXXXXX-XX-      | CP1Cur3C4C15C17ole_Cionus_olens_JN163958_MERGED                   |
| -XX-----X--X-     | CP1Cur3C4C15La7tur      | --XXXXXXXXXXXXX-----   | CP1Cur3C4C15La7tur_Larinus_turbinatus_JN163952             | -XXXXXXXXXXXX-XX-      | CP1Cur3C4C15La7tur_Larinus_turbinatus_JN163952_MERGED             |
| -X-----X-----     | CP1Cur3C4C5Co7cyc       | XXXXXXXXXXXXXXXXX----- | CP1Cur3C4C5Co7cyc_Coptonotus_cyclopus_Curc.idba.67         | XXXXXXXXXXXXXXXXX----  | CP1Cur3C4C5Co7cyc_Coptonotus_cyclopus_Curc.idba.67_MERGED         |
| -XX-----XX-       | CP1Cur3C4Cr5Ac7mis      | --XXXXXXXXXXXXX-----   | CP1Cur3C4Cr5Ac7mis_Acalles_misellus_BIUK.idba.57           | -X-XXXXXXXXXXXX-XX-    | CP1Cur3C4Cr5Ac7mis_Acalles_misellus_BIUK.idba.57_MERGED           |
| -XX-----XX-XX-    | CP1Cur3C4Cr5Ac7pti      | XXXXXXXXXXXXXXXXX----- | CP1Cur3C4Cr5Ac7pti_Acalles_ptinoides_BIUK.idba.42          | XXXXXXXXXXXXXXXXX-XX-  | CP1Cur3C4Cr5Ac7pti_Acalles_ptinoides_BIUK.idba.42_MERGED          |
| -X-----XX-        | CP1Cur3C4Cr5Ec7and      | XXXXX-----             | CP1Cur3C4Cr5Ec7and_Echinodera_andalusiensis_Soil.idba.193  | XXXXX-----XX-          | CP1Cur3C4Cr5Ec7and_Echinodera_andalusiensis_Soil.idba.193_MERGED  |
| -X-----XX-        | CP1Cur3C4Cr5Ky7aub      | -XXXXXXXXXXXXX-----    | CP1Cur3C4Cr5Ky7aub_Kyklioacalles_aubei_JN163957            | XXXXXXXXXXXXX-----     | CP1Cur3C4Cr5Ky7aub_Kyklioacalles_aubei_JN163957_MERGED            |
| -X-----XX-        | CP1Cur3C4Cr5Ky7rob      | -----XXXXX-----        | CP1Cur3C4Cr5Ky7rob_Kyklioacalles_roboris_BIUK.idba.79      | -X-----XXXXX-----      | CP1Cur3C4Cr5Ky7rob_Kyklioacalles_roboris_BIUK.idba.79_MERGED      |
| -XX-----XXX-X-    | CP1Cur3C4Cr5Ou7squ      | XXXXXXXXXXXXXXXXX----- | CP1Cur3C4Cr5Ou7squ_Ouroproterus_squamiventris_Curc.idba.5  | XXXXXXXXXXXXXXXXX-X-   | CP1Cur3C4Cr5Ou7squ_Ouroproterus_squamiventris_Curc.idba.5_MERGED  |
| -X-----X-----     | CP1Cur3C4Cy5Di7man      | XXXXXXXXXXXXX-----     | CP1Cur3C4Cy5Di7man_Dichotrachelus_manueli_Curc.idba.88     | XXXXXXXXXXXXX-----     | CP1Cur3C4Cy5Di7man_Dichotrachelus_manueli_Curc.idba.88_MERGED     |
| -XX-----XX-       | CP1Cur3C4D5Co7sor       | XXXXXXXXXXXXXXXXX----- | CP1Cur3C4D5Co7sor_Cosmopolites_sordidus_Curc.idba.8        | XXXXXXXXXXXXXXXXX----  | CP1Cur3C4D5Co7sor_Cosmopolites_sordidus_Curc.idba.8_MERGED        |
| -XX-----XXX-      | CP1Cur3C4D5Rhi7bar      | XXXXXXXXXXXXXXXXX----- | CP1Cur3C4D5Rhi7bar_Rhinostomus_barbirostris_Panama.idba.10 | XXXXXXXXXXXXXXXXX----  | CP1Cur3C4D5Rhi7bar_Rhinostomus_barbirostris_Panama.idba.10_MERGED |
| -X-X-----XXX-     | CP1Cur3C4D5Si7gra       | --XXXXX-XX-----        | CP1Cur3C4D5Si7gra_Sitophilus_granarius_JN163959            | -XXXXX-XX-----XXXX     | CP1Cur3C4D5Si7gra_Sitophilus_granarius_JN163959_MERGED            |
| -XXX-----X-X--X-  | CP1Cur3C4E5B6St7mel     | --XXXXXXXXXXXXX-----   | CP1Cur3C4E5B6St7mel_Strophosoma_melanogrammum_JN163949     | -XXXXXXXXXXXX-XX-      | CP1Cur3C4E5B6St7mel_Strophosoma_melanogrammum_JN163949_MERGED     |
| -----XX-          | CP1Cur3C4E5G6Ba7obs     | -XXXXXXXXXXXXX-----    | CP1Cur3C4E5G6Ba7obs_Barynotus_obscurus_JN163950            | -XXXXXXXXXXXX-XX-      | CP1Cur3C4E5G6Ba7obs_Barynotus_obscurus_JN163950_MERGED            |
| XXXXXXXXXXXX-XXXX | CP1Cur3C4E5N6Na7xan     | XXXXXXXXXXXXXXXXX----- | CP1Cur3C4E5N6Na7xan_Naupactus_xanthographus_NC_018354      | XXXXXXXXXXXXXXXXX----  | CP1Cur3C4E5N6Na7xan_Naupactus_xanthographus_NC_018354_MERGED      |
| -X-X-----X-----   | CP1Cur3C4E5Ot60T7mor    | XXXXXXXXXXXXX-----     | CP1Cur3C4E5Ot60T7mor_Otiorhynchus_morio_ameie.idba.90      | XXXXXXXXXXXXX-----X-   | CP1Cur3C4E5Ot60T7mor_Otiorhynchus_morio_ameie.idba.90_MERGED      |
| -XXX-----X-----   | CP1Cur3C4E5Ot60T7rug    | --XXXXXXXXXXXXX-----   | CP1Cur3C4E5Ot60T7rug_Otiorhynchus_rugosostriatus_JN163969  | -XXXXXXXXXXXX-----     | CP1Cur3C4E5Ot60T7rug_Otiorhynchus_rugosostriatus_JN163969_MERGED  |
| -XXX-----X-XXXX-  | CP1Cur3C4E5Ot60T7sul    | XXXXXXXXXXXXXXXXX----- | CP1Cur3C4E5Ot60T7sul_Otiorhynchus_sulcatus_Curc.idba.36    | XXXXXXXXXXXXXXXXX----  | CP1Cur3C4E5Ot60T7sul_Otiorhynchus_sulcatus_Curc.idba.36_MERGED    |
| -X-----X-----     | CP1Cur3C4E5Po6P7mar     | --XXXXXXXXXXXXX-----   | CP1Cur3C4E5Po6P7mar_Polydrusus_marginatus_JN039360         | -XXXXXXXXXXXX-----     | CP1Cur3C4E5Po6P7mar_Polydrusus_marginatus_JN039360_MERGED         |
| -XX-----X-----    | CP1Cur3C4E5S6Si7dis     | XXXXXXXXXXXXXXXXX----- | CP1Cur3C4E5S6Si7dis_Sitona_discoideus_Soil.idba.86         | XXXXXXXXXXXXXXXXX-XX-  | CP1Cur3C4E5S6Si7dis_Sitona_discoideus_Soil.idba.86_MERGED         |
| -XX-----X--X-     | CP1Cur3C4E5S6Si7lin     | --XXXXXXXXXXXXX-----   | CP1Cur3C4E5S6Si7lin_Sitona_lineatus_JN163948               | -XXXXXXXXXXXX-XX-      | CP1Cur3C4E5S6Si7lin_Sitona_lineatus_JN163948_MERGED               |
| -X-----X-----     | CP1Cur3C4E5T6T77ele     | XXXXXXXXXXXXX-----     | CP1Cur3C4E5T6T77ele_Tropiphorus_elevatus_ameie.idba.114    | XXXXXXXXXXXXX-----     | CP1Cur3C4E5T6T77ele_Tropiphorus_elevatus_ameie.idba.114_MERGED    |
| -----XXX-         | CP1Cur3C4H5Hy7bru       | XXXXXXXXXXXXXXXXX----- | CP1Cur3C4H5Hy7bru_Hypera_brunneipennis_Soil.idba.79        | XXXXXXXXXXXXXXXXX----  | CP1Cur3C4H5Hy7bru_Hypera_brunneipennis_Soil.idba.79_MERGED        |
| -XX-----XXXXX-    | CP1Cur3C4H5Hy7pos       | --XXXXXXXXXXXXX-----   | CP1Cur3C4H5Hy7pos_Hypera_postica_JN163953                  | -XXXXXXXXXXXXXXXXX---- | CP1Cur3C4H5Hy7pos_Hypera_postica_JN163953_MERGED                  |
| -XX-----X-----    | CP1Cur3C4M5H6Hy7abi     | --XXXXXXXXXXXXX-----   | CP1Cur3C4M5H6Hy7abi_Hylobius_abietis_JN163954              | -XXXXXXXXXXXX-----     | CP1Cur3C4M5H6Hy7abi_Hylobius_abietis_JN163954_MERGED              |
| XXXXXXXX-XXXX-    | CP1Cur3C4M5H6Hy17xia    | XXXXXXXXXXXXXXXXX----- | CP1Cur3C4M5H6Hy17xia_Hylobitelus_xiaoi_NC_022680           | XXXXXXXXXXXXXXXXX----  | CP1Cur3C4M5H6Hy17xia_Hylobitelus_xiaoi_NC_022680_MERGED           |
| -X-----X-----     | CP1Cur3C4M5P6P17pin     | XXXXXXXXXXXXXXXXX----- | CP1Cur3C4M5P6P17pin_Pissodes_pini_Curc.idba.48             | XXXXXXXXXXXXXXXXX----  | CP1Cur3C4M5P6P17pin_Pissodes_pini_Curc.idba.48_MERGED             |
| -X-----X-----     | CP1Cur3C4P6Dia7uni      | XXXXXXXXXXXXXXXXX----- | CP1Cur3C4P6Dia7uni_Diapus_unispneus_Curc.idba.33           | XXXXXXXXXXXXXXXXX----  | CP1Cur3C4P6Dia7uni_Diapus_unispneus_Curc.idba.33_MERGED           |
| -XX-----XXX-      | CP1Cur3C4P6Eu7par       | XXXXXXXXXXXXXXXXX----- | CP1Cur3C4P6Eu7par_Euplatypus_parallelus_Scoly.idba.25      | XXXXXXXXXXXXXXXXX----  | CP1Cur3C4P6Eu7par_Euplatypus_parallelus_Scoly.idba.25_MERGED      |
| -XX-----XX-       | CP1Cur3C4P6P17cyl       | XXXXXXXXXXXXXXXXX----- | CP1Cur3C4P6P17cyl_Platypus_cylindrus_Curc.idba.22          | XXXXXXXXXXXXXXXXX-XX-  | CP1Cur3C4P6P17cyl_Platypus_cylindrus_Curc.idba.22_MERGED          |

|                   |                      |                       |                                                            |                         |                                                                   |
|-------------------|----------------------|-----------------------|------------------------------------------------------------|-------------------------|-------------------------------------------------------------------|
| -XX-----X--XX-    | CP1Cur3C4Po5Li7tes   | --XXXXXXXXX-----      | CP1Cur3C4Po5Li7tes_Liophloeus_tessulatus_JN163947          | -XXXXXXXXXXXX--XX-      | CP1Cur3C4Po5Li7tes_Liophloeus_tessulatus_JN163947_MERGED          |
| -XX-----X-----    | CP1Cur3C4Rh5Rh7que   | XXXXXXXXXXXXXXXXX---- | CP1Cur3C4Rh5Rh7que_Rhynchaenus_quercus_BIUK.idba.11        | XXXXXXXXXXXXXXXXX----   | CP1Cur3C4Rh5Rh7que_Rhynchaenus_quercus_BIUK.idba.11_MERGED        |
| -X-----X-----     | CP1Cur3C4S5An7dis    | XXXXXXXXXXXXXXXXX---- | CP1Cur3C4S5An7dis_Anisandrus_dispr_Scoly.idba.47           | XXXXXXXXXXXXXXXXX----   | CP1Cur3C4S5An7dis_Anisandrus_dispr_Scoly.idba.47_MERGED           |
| -XX-----XX---     | CP1Cur3C4S5Co7cyp    | XXXXXXXXXXXXXXXXX---- | CP1Cur3C4S5Co7cyp_Coccotrypes_cyper_i FG.idba.60           | XXXXXXXXXXXXXXXXX----   | CP1Cur3C4S5Co7cyp_Coccotrypes_cyper_i FG.idba.60_MERGED           |
| -X-----X-----     | CP1Cur3C4S5Co7rub    | XXXXXXXXX-----        | CP1Cur3C4S5Co7rub_Corthylus_rubricollis_Curc.idba.99       | XXXXXXXXX-----X---      | CP1Cur3C4S5Co7rub_Corthylus_rubricollis_Curc.idba.99_MERGED       |
| -X-----X-----     | CP1Cur3C4S5Cr7sal    | XXXXXXXXXXXXXXXXX---- | CP1Cur3C4S5Cr7sal_Cryphalus_saltuarius_Curc.idba.19        | XXXXXXXXXXXXXXXXX----   | CP1Cur3C4S5Cr7sal_Cryphalus_saltuarius_Curc.idba.19_MERGED        |
| -X-----X-----     | CP1Cur3C4S5Cry7pus   | XXXXXXXXXXXXXXXXX---- | CP1Cur3C4S5Cry7pus_Crypturgus_pusillus_Curc.idba.42        | XXXXXXXXXXXXXXXXX----   | CP1Cur3C4S5Cry7pus_Crypturgus_pusillus_Curc.idba.42_MERGED        |
| -X-----X-----     | CP1Cur3C4S5Cyc7bod   | XXXXXXXXXXXXXXXXX---- | CP1Cur3C4S5Cyc7bod_Cyclorhipidion_bodoanus_Scoly.idba.52   | XXXXXXXXXXXXXXXXX----   | CP1Cur3C4S5Cyc7bod_Cyclorhipidion_bodoanus_Scoly.idba.52_MERGED   |
| -X-----X-----     | CP1Cur3C4S5Di7ine    | XXXXXXXXXXXXXXXXX---- | CP1Cur3C4S5Di7ine_Diamerus_inermis_Curc.idba.58            | XXXXXXXXXXXXXXXXX----   | CP1Cur3C4S5Di7ine_Diamerus_inermis_Curc.idba.58_MERGED            |
| -XX-----XXXX-     | CP1Cur3C4S5Dry7aut   | -----XXXX---          | CP1Cur3C4S5Dry7aut_Dryocoetes_autographus_Curc.idba.118    | -XX-----XXXXXXX-        | CP1Cur3C4S5Dry7aut_Dryocoetes_autographus_Curc.idba.118_MERGED    |
| -X-----X-----     | CP1Cur3C4S5Dry7vil   | XXXXXXXXXXXXXXXXX---- | CP1Cur3C4S5Dry7vil_Dryocoetes_villosus_Scoly.idba.38       | XXXXXXXXXXXXXXXXX----   | CP1Cur3C4S5Dry7vil_Dryocoetes_villosus_Scoly.idba.38_MERGED       |
| -X-----X-----     | CP1Cur3C4S5Ern7fag   | XXXXXXXXXXXXXXXXX---- | CP1Cur3C4S5Ern7fag_Ernoporicus_fagi_ameie.idba.75          | XXXXXXXXXXXXXXXXX----   | CP1Cur3C4S5Ern7fag_Ernoporicus_fagi_ameie.idba.75_MERGED          |
| -XX-----X---      | CP1Cur3C4S5Gna7mat   | XXXXXXXXXXXXXXXXX---- | CP1Cur3C4S5Gna7mat_Gnathotrichus_materiarius_Scoly.idba.22 | XXXXXXXXXXXXXXXXX----   | CP1Cur3C4S5Gna7mat_Gnathotrichus_materiarius_Scoly.idba.22_MERGED |
| -X-----XXX-       | CP1Cur3C4S5Hyla7ate  | XXXXXXXXXXXXXXXXX---- | CP1Cur3C4S5Hyla7ate_Hylastes_ater_Scoly.idba.54            | XXXXXXXXXXXXXXXXX----   | CP1Cur3C4S5Hyla7ate_Hylastes_ater_Scoly.idba.54_MERGED            |
| -X-----XXX-       | CP1Cur3C4S5Hyla7att  | XXXXXXXXXXXXXXXXX---- | CP1Cur3C4S5Hyla7att_Hylastes_attenuatus_Scoly.idba.12      | XXXXXXXXXXXXXXXXX----   | CP1Cur3C4S5Hyla7att_Hylastes_attenuatus_Scoly.idba.12_MERGED      |
| -X-----XXX-       | CP1Cur3C4S5Hyla7bru  | XXXXXXXXXXXXXXXXX---- | CP1Cur3C4S5Hyla7bru_Hylastes_brunneus_Scoly.idba.41        | XXXXXXXXXXXXXXXXX----   | CP1Cur3C4S5Hyla7bru_Hylastes_brunneus_Scoly.idba.41_MERGED        |
| -X-----XXX-       | CP1Cur3C4S5Hyla7opa  | XXXXXXXXXXXXXXXXX---- | CP1Cur3C4S5Hyla7opa_Hylastes_opacus_Curc.idba.62           | XXXXXXXXXXXXXXXXX----   | CP1Cur3C4S5Hyla7opa_Hylastes_opacus_Curc.idba.62_MERGED           |
| -X-----XXX-       | CP1Cur3C4S5Hyle7var  | --XXXXX-----          | CP1Cur3C4S5Hyle7var_Hylesinus_varius_ameie.idba.170        | -XXXXXX-----XXX-        | CP1Cur3C4S5Hyle7var_Hylesinus_varius_ameie.idba.170_MERGED        |
| -X-----X-XXX-     | CP1Cur3C4S5Hylur7pal | XXXXXXXXXXXXXXXXX---- | CP1Cur3C4S5Hylur7pal_Hylurgops_palliatus_Scoly.idba.48     | XXXXXXXXXXXXXXXXX----   | CP1Cur3C4S5Hylur7pal_Hylurgops_palliatus_Scoly.idba.48_MERGED     |
| -X-----X---       | CP1Cur3C4S5Hyp7fic   | XXXXXXXXXXXXXXXXX---- | CP1Cur3C4S5Hyp7fic_Hypoborus_ficus_Curc.idba.77            | XXXXXXXXXXXXXXXXX----   | CP1Cur3C4S5Hyp7fic_Hypoborus_ficus_Curc.idba.77_MERGED            |
| -XX-----X-XXX-    | CP1Cur3C4S5Ip7acu    | XXXXXXXXXXXXXXXXX---- | CP1Cur3C4S5Ip7acu_Ips_acuminatus_Curc.idba.2               | XXXXXXXXXXXXXXXXX----   | CP1Cur3C4S5Ip7acu_Ips_acuminatus_Curc.idba.2_MERGED               |
| -XX-----X-XXX-    | CP1Cur3C4S5Ip7cem    | --XXX---XXX-----      | CP1Cur3C4S5Ip7cem_Ips_cembrae_JN163961                     | -XXX---XXX-----XXX-     | CP1Cur3C4S5Ip7cem_Ips_cembrae_JN163961_MERGED                     |
| -XX-----X-XXX-    | CP1Cur3C4S5Ip7sex    | XXXXXXXXXXXXXXXXX---- | CP1Cur3C4S5Ip7sex_Ips_sexdentatus_Scoly.idba.4             | XXXXXXXXXXXXXXXXX----   | CP1Cur3C4S5Ip7sex_Ips_sexdentatus_Scoly.idba.4_MERGED             |
| -XX-----X-XX-     | CP1Cur3C4S5Or7lar    | XXXXXXXXXXXXXXXXX---- | CP1Cur3C4S5Or7lar_Orthotomicus_laricis_Scoly.idba.3        | XXXXXXXXXXXXXXXXX-XX-   | CP1Cur3C4S5Or7lar_Orthotomicus_laricis_Scoly.idba.3_MERGED        |
| -X-----X-X---     | CP1Cur3C4S5P17qua    | XXXXXXXXXXXXXXXXX---- | CP1Cur3C4S5P17qua_Pityogenes_quadridens_Scoly.idba.23      | XXXXXXXXXXXXXXXXX-X     | CP1Cur3C4S5P17qua_Pityogenes_quadridens_Scoly.idba.23_MERGED      |
| -XX-----XXXX-     | CP1Cur3C4S5P17tre    | XXXXXXXXXXXXXXXXX---- | CP1Cur3C4S5P17tre_Pityogenes_trepanatus_Scoly.idba.5       | XXXXXXXXXXXXXXXXX----   | CP1Cur3C4S5P17tre_Pityogenes_trepanatus_Scoly.idba.5_MERGED       |
| -X-----X---       | CP1Cur3C4S5P17mic    | XXXXXXXXXXXXXXXXX---- | CP1Cur3C4S5P17mic_Pityophthorus_micrographus_Curc.idba.39  | XXXXXXXXXXXXXXXXX----   | CP1Cur3C4S5P17mic_Pityophthorus_micrographus_Curc.idba.39_MERGED  |
| -X-----X---       | CP1Cur3C4S5P17pub    | XXXXXXXXXXXXXXXXX---- | CP1Cur3C4S5P17pub_Pityophthorus_pubescens_Scoly.idba.14    | XXXXXXXXXXXXXXXXX----   | CP1Cur3C4S5P17pub_Pityophthorus_pubescens_Scoly.idba.14_MERGED    |
| -XX-----X---      | CP1Cur3C4S5Po7pol    | XXXXXXXXXXXXXXXXX---- | CP1Cur3C4S5Po7pol_Polygraphus_poligraphus_Curc.idba.16     | XXXXXXXXXXXXXXXXX----   | CP1Cur3C4S5Po7pol_Polygraphus_poligraphus_Curc.idba.16_MERGED     |
| -XX-----X-XX-X    | CP1Cur3C4S5Pr7cav    | XXXXXXXXXXXXXXXXX---- | CP1Cur3C4S5Pr7cav_Premnobius_cavipennis_Curc.idba.4        | XXXXXXXXXXXXXXXXX-X     | CP1Cur3C4S5Pr7cav_Premnobius_cavipennis_Curc.idba.4_MERGED        |
| -XX-----XX---     | CP1Cur3C4S5Sa7dam    | XXXXXXXXX-----        | CP1Cur3C4S5Sa7dam_Sampsonius_dampfi_Scoly.idba.59          | XXXXXXXXX-----XX---     | CP1Cur3C4S5Sa7dam_Sampsonius_dampfi_Scoly.idba.59_MERGED          |
| -X-----X---       | CP1Cur3C4S5Scol7sco  | XXXXXXXXXXXXXXXXX---- | CP1Cur3C4S5Scol7sco_Scolytus_scolytus_Curc.idba.23         | XXXXXXXXXXXXXXXXX----   | CP1Cur3C4S5Scol7sco_Scolytus_scolytus_Curc.idba.23_MERGED         |
| -X-----XXX-       | CP1Cur3C4S5Te7dew    | -XXXXXXXX-----        | CP1Cur3C4S5Te7dew_Tesserocerus_dewalquei_Curc.idba.95      | -XXXXXXXX-----XXX-      | CP1Cur3C4S5Te7dew_Tesserocerus_dewalquei_Curc.idba.95_MERGED      |
| -XX-----XXXX-     | CP1Cur3C4S5To7pin    | XXXXXXXXXXXXXXXXX---- | CP1Cur3C4S5To7pin_Tomicus_piniperda_Scoly.idba.17          | XXXXXXXXXXXXXXXXX----   | CP1Cur3C4S5To7pin_Tomicus_piniperda_Scoly.idba.17_MERGED          |
| -X-----X---       | CP1Cur3C4S5Tr7dom    | XXXXXXXXXXXXXXXXX---- | CP1Cur3C4S5Tr7dom_Trypodendron_domesticum_Scoly.idba.7     | XXXXXXXXXXXXXXXXX----   | CP1Cur3C4S5Tr7dom_Trypodendron_domesticum_Scoly.idba.7_MERGED     |
| -XX-----X---      | CP1Cur3C4S5Tr7sig    | XXXXXXXXXXXXXXXXX---- | CP1Cur3C4S5Tr7sig_Trypodendron_signatum_Scoly.idba.49      | XXXXXXXXXXXXXXXXX----   | CP1Cur3C4S5Tr7sig_Trypodendron_signatum_Scoly.idba.49_MERGED      |
| -XX-----XXX-      | CP1Cur3C4S5Xy7saxe   | XXXXXXXXXXXXXXXXX---- | CP1Cur3C4S5Xy7saxe_Xyleborinus_saxesenii_Scoly.idba.28     | XXXXXXXXXXXXXXXXX----   | CP1Cur3C4S5Xy7saxe_Xyleborinus_saxesenii_Scoly.idba.28_MERGED     |
| -XX-----XX---     | CP1Cur3C4S5Xyl7aff   | XXXXXXXXXXXXXXXXX---- | CP1Cur3C4S5Xyl7aff_Xyleborus_affinis_Scoly.idba.33         | XXXXXXXXXXXXXXXXX----   | CP1Cur3C4S5Xyl7aff_Xyleborus_affinis_Scoly.idba.33_MERGED         |
| -XX-----XX---     | CP1Cur3C4S5Xyl7per   | XXXXXXXXXXXXXXXXX---- | CP1Cur3C4S5Xyl7per_Xyleborus_perforans_Scoly.idba.27       | XXXXXXXXXXXXXXXXX----   | CP1Cur3C4S5Xyl7per_Xyleborus_perforans_Scoly.idba.27_MERGED       |
| -X-----X---       | CP1Cur3C4S5Xyl7vol   | XXXXXXXXX-----        | CP1Cur3C4S5Xyl7vol_Xyleborus_volvulus_Scoly.idba.63        | XXXXXXXXX-----X---      | CP1Cur3C4S5Xyl7vol_Xyleborus_volvulus_Scoly.idba.63_MERGED        |
| -X-----X---       | CP1Cur3C4S5Xyl7com   | XXXXXXXXXXXXXXXXX---- | CP1Cur3C4S5Xyl7com_Xylosandrus_compactus_FG.idba.55        | XXXXXXXXXXXXXXXXX----   | CP1Cur3C4S5Xyl7com_Xylosandrus_compactus_FG.idba.55_MERGED        |
| -XX-----XX---     | CP1Cur3C4S5Xyl7cra   | XXXXXXXXXXXXXXXXX---- | CP1Cur3C4S5Xyl7cra_Xylosandrus_crassiusculus_Scoly.idba.34 | XXXXXXXXXXXXXXXXX----   | CP1Cur3C4S5Xyl7cra_Xylosandrus_crassiusculus_Scoly.idba.34_MERGED |
| -XX-----X---      | CP1Cur3C4S5Xyl7ger   | XXXXXXXXXXXXXXXXX---- | CP1Cur3C4S5Xyl7ger_Xylosandrus_germanus_Scoly.idba.35      | XXXXXXXXXXXXXXXXX----   | CP1Cur3C4S5Xyl7ger_Xylosandrus_germanus_Scoly.idba.35_MERGED      |
| -X-----X---       | CP1Cur3C4S5Xyl7mor   | XXXXXXXXXXXXXXXXX---- | CP1Cur3C4S5Xyl7mor_Xylosandrus_morigerus_Scoly.idba.37     | XXXXXXXXXXXXXXXXX----   | CP1Cur3C4S5Xyl7mor_Xylosandrus_morigerus_Scoly.idba.37_MERGED     |
| -X-----X---       | CP1Cur3C4S5Xyl7mac   | XXXXXXXXXXXXXXXXX---- | CP1Cur3C4S5Xyl7mac_Xyloctonus_maculatus_Curc.idba.71       | XXXXXXXXXXXXXXXXX----   | CP1Cur3C4S5Xyl7mac_Xyloctonus_maculatus_Curc.idba.71_MERGED       |
| -XX-----XX---     | CP1Cur3C4T5Ty7pus    | XXXXXXXXXXXXXXXXX---- | CP1Cur3C4T5Ty7pus_Tychius_pusillus_Soil.idba.71            | XXXXXXXXXXXXXXXXX----   | CP1Cur3C4T5Ty7pus_Tychius_pusillus_Soil.idba.71_MERGED            |
| -X-----X-XXX-     | CP1Cur3M4Do7aus      | -XXXXXXXXXXXX-----    | CP1Cur3M4Do7aus_Doydirhynchus_austriacus_JN163964          | -XXXXXXXXXXXX-----XXX-  | CP1Cur3M4Do7aus_Doydirhynchus_austriacus_JN163964_MERGED          |
| -XX-----XX-XX-XXX | CP1D3D4Da7cer        | --XXXXXXXXX-----      | CP1D3D4Da7cer_Dascillus_cervinus_JQ034414                  | -XXXXXXXXXXXX-----XXX   | CP1D3D4Da7cer_Dascillus_cervinus_JQ034414_MERGED                  |
| -XX-----XXXX-     | CP1E3C4C5Ca7pel      | -XXXXXXXXXXXX-----    | CP1E3C4C5Ca7pel_Cantharis_pellucida_HQ232817               | -XXXXXXXXXXXX-----XXXX- | CP1E3C4C5Ca7pel_Cantharis_pellucida_HQ232817_MERGED               |
| -X-----X---       | CP1E3C4C5Ca7tri      | -XXXXXXXXXXXX-----    | CP1E3C4C5Ca7tri_Cantharis_tristis_ameie.idba.95            | -XXXXXXXXXXXX-----X---  | CP1E3C4C5Ca7tri_Cantharis_tristis_ameie.idba.95_MERGED            |
| XXXXXXXXXX-XXXXXX | CP1E3C4Ch5Ch7opa     | XXXXXXXXXXXXXXXXX---- | CP1E3C4Ch5Ch7opa_Chauliognathus_opacus_NC_013576           | XXXXXXXXXXXXXXXXX----   | CP1E3C4Ch5Ch7opa_Chauliognathus_opacus_NC_013576_MERGED           |
| -X-----X---       | CP1E3C4M5Ma7bal      | XXXXXXXXXXXXXXXXX---- | CP1E3C4M5Ma7bal_Malthinus_balteatus_Soil.idba.38           | XXXXXXXXXXXXXXXXX----   | CP1E3C4M5Ma7bal_Malthinus_balteatus_Soil.idba.38_MERGED           |
| -XX-----XX---     | CP1E3C4M5Ma7mar      | XXXXXXX-----          | CP1E3C4M5Ma7mar_Malthodes_marginatus_BIUK.idba.61          | XXXXXXX-----XXXX-       | CP1E3C4M5Ma7mar_Malthodes_marginatus_BIUK.idba.61_MERGED          |
| -XX-----XX-XXX    | CP1E3D4Dr7fla        | XXXXXXXXXXXXXXXXX---- | CP1E3D4Dr7fla_Drilus_flavescens_HQ232815                   | XXXXXXXXXXXXXXXXX-XXX   | CP1E3D4Dr7fla_Drilus_flavescens_HQ232815_MERGED                   |
| XXXX-XXXXX-X-X--- | CP1E3E4A5Py7div      | XXXXXXXXXXXXXXXXX---- | CP1E3E4A5Py7div_Pyrophorus_divergens_NC_009964             | XXXXXXXXXXXXXXXXX----   | CP1E3E4A5Py7div_Pyrophorus_divergens_NC_009964_MERGED             |

|                     |                      |                       |                                                           |                           |                                                                  |
|---------------------|----------------------|-----------------------|-----------------------------------------------------------|---------------------------|------------------------------------------------------------------|
| -XX-----XX-XXX      | CP1E3E4C5D1c7cin     | -XXXXXXXXXX-----      | CP1E3E4C5D1c7cin_Dicronychus_cinereus_amie.idba.96        | -XXXXXXXXXXXX-XXX         | CP1E3E4C5D1c7cin_Dicronychus_cinereus_amie.idba.96_MERGED        |
| -X-----             | CP1E3E4D5Ca7bip      | XXXXXXXXXXXXXXXX----- | CP1E3E4D5Ca7bip_Calambus_bipustulatus_BIUK.idba.31        | XXXXXXXXXXXXXXXX-----     | CP1E3E4D5Ca7bip_Calambus_bipustulatus_BIUK.idba.31_MERGED        |
| -X-----             | CP1E3E4D5Hyp7inu     | XXXXXXXXXXXXXXXX----- | CP1E3E4D5Hyp7inu_Hypoganus_inunctus_amie.idba.58          | XXXXXXXXXXXXXXXX-----     | CP1E3E4D5Hyp7inu_Hypoganus_inunctus_amie.idba.58_MERGED          |
| -XX-----XX-XXX      | CP1E3E4D5PH7que      | XXXXXXXXXX-----       | CP1E3E4D5PH7que_Pheletes_quercus_amie.idba.137            | XXXXXXXXXX-----XX-XXX     | CP1E3E4D5PH7que_Pheletes_quercus_amie.idba.137_MERGED            |
| -X-----             | CP1E3E4De5An7cas     | XXXXXXXXXXXXXXXX----- | CP1E3E4De5An7cas_Anostirus_castaneus_amie.idba.28         | XXXXXXXXXXXXXXXX-----     | CP1E3E4De5An7cas_Anostirus_castaneus_amie.idba.28_MERGED         |
| -XX-----XX-XXX      | CP1E3E4De5At7hae     | XXXXXXXXXXXXXXXX----- | CP1E3E4De5At7hae_Athous_haemorrhoidalis_2VGB.idba.8       | XXXXXXXXXXXXXXXX-----XXX  | CP1E3E4De5At7hae_Athous_haemorrhoidalis_2VGB.idba.8_MERGED       |
| -XX-----            | CP1E3E4De5Lim7min    | XXXXXXXXXXXXXXXX----- | CP1E3E4De5Lim7min_Limonius_minutus_amie.idba.27           | XXXXXXXXXXXXXXXX-----     | CP1E3E4De5Lim7min_Limonius_minutus_amie.idba.27_MERGED           |
| -X-----             | CP1E3E4E5Ad7rac      | XXXXXXXXXXXXXXXX----- | CP1E3E4E5Ad7rac_Adrastus_rachifer_amie.idba.32            | XXXXXXXXXXXXXXXX-----     | CP1E3E4E5Ad7rac_Adrastus_rachifer_amie.idba.32_MERGED            |
| -XX-----XX-XXX      | CP1E3E4E5Ag7obs      | XXXXXXXXXXXXXXXX----- | CP1E3E4E5Ag7obs_Agriotes_obscurus_2VGB.idba.10            | XXXXXXXXXXXXXXXX-----XXX  | CP1E3E4E5Ag7obs_Agriotes_obscurus_2VGB.idba.10_MERGED            |
| -XX-----XX-XXX      | CP1E3E4E5Ag7ust      | -XXXXXXXXXXXX-----    | CP1E3E4E5Ag7ust_Agriotes_ustulatus_JX412737               | -XXXXXXXXXXXX-----XXX     | CP1E3E4E5Ag7ust_Agriotes_ustulatus_JX412737_MERGED               |
| -X-----             | CP1E3E4E5Da7mar      | XXXXXXXXXXXXXXXX----- | CP1E3E4E5Da7mar_Dalopius_marginatus_BIUK.idba.34          | XXXXXXXXXXXXXXXX-----     | CP1E3E4E5Da7mar_Dalopius_marginatus_BIUK.idba.34_MERGED          |
| -X-----             | CP1E3E4E5Id7pic      | XXXXXXXXXXXXXXXX----- | CP1E3E4E5Id7pic_Idolus_picipennis_amie.idba.67            | XXXXXXXXXXXXXXXX-----     | CP1E3E4E5Id7pic_Idolus_picipennis_amie.idba.67_MERGED            |
| -XX-----XX-XXX      | CP1E3E4M5Me7vil      | XXXXXXXXXXXXXXXX----- | CP1E3E4M5Me7vil_Melanotus_villosus_2VGB.idba.11           | XXXXXXXXXXXXXXXX-----XXX  | CP1E3E4M5Me7vil_Melanotus_villosus_2VGB.idba.11_MERGED           |
| -X-----             | CP1E3E4N5Ne7sab      | XXXXXX-----           | CP1E3E4N5Ne7sab_Negastrius_sabulicola_amie.idba.161       | XXXXXX-----               | CP1E3E4N5Ne7sab_Negastrius_sabulicola_amie.idba.161_MERGED       |
| -XX-----XX-XXX      | CP1E3Eu4Me7bup       | XXXXXXXXXXXXXXXX----- | CP1E3Eu4Me7bup_Melasis_buprestoides_amie.idba.87          | XXXXXXXXXXXXXXXX-----XXX  | CP1E3Eu4Me7bup_Melasis_buprestoides_amie.idba.87_MERGED          |
| -XX-----X--XX-      | CP1E3L4L5La7noc      | XXXXXXXXXXXXXXXX----- | CP1E3L4L5La7noc_Lampyrus_noctiluca_amie.idba.10           | XXXXXXXXXXXXXXXX-----XX-  | CP1E3L4L5La7noc_Lampyrus_noctiluca_amie.idba.10_MERGED           |
| XXXXXXXXXXXX-XXX--- | CP1E3L4L5Py7ruf      | XXXXXXXXXXXXXXXX----- | CP1E3L4L5Py7ruf_Pyrocoelia_rufa_NC_003970                 | XXXXXXXXXXXXXXXX-----     | CP1E3L4L5Py7ruf_Pyrocoelia_rufa_NC_003970_MERGED                 |
| XXXXXXXXXXXX-X----  | CP1E3L4Lu5Aq7lei     | XXXXXXXXXXXXXXXX----- | CP1E3L4Lu5Aq7lei_Aquatica_lei_NC_025276                   | XXXXXXXXXXXXXXXX-----     | CP1E3L4Lu5Aq7lei_Aquatica_lei_NC_025276_MERGED                   |
| XXXXXXXXXXXX-XXX--- | CP1E3L4Lu5Lu7cru     | XXXXXXXXXXXXXXXX----- | CP1E3L4Lu5Lu7cru_Luciola_cruciata_NC_022472               | XXXXXXXXXXXXXXXX-----     | CP1E3L4Lu5Lu7cru_Luciola_cruciata_NC_022472_MERGED               |
| -XX-----X--XXX      | CP1E3Ly4Be7tay       | XXXXXXXXXXXXXXXX----- | CP1E3Ly4Be7tay_Benibotarus_taygetanus_amie.idba.23        | XXXXXXXXXXXXXXXX-----XXX  | CP1E3Ly4Be7tay_Benibotarus_taygetanus_amie.idba.23_MERGED        |
| -XX-----X--XXX      | CP1E3Ly4Dic7aur      | XXXXXXXXXXXXXXXX----- | CP1E3Ly4Dic7aur_Dictyoptera_aurora_JX412733               | XXXXXXXXXXXXXXXX-----XXX  | CP1E3Ly4Dic7aur_Dictyoptera_aurora_JX412733_MERGED               |
| -X-----X-X--XX-     | CP1E3Ly4Li7gra       | -----XXXXXXXX-----    | CP1E3Ly4Li7gra_Libnetis_granicollis_JX412813              | -X-----XXXXXXXX-XX-       | CP1E3Ly4Li7gra_Libnetis_granicollis_JX412813_MERGED              |
| -XX-----X--XXX      | CP1E3Ly4Pl7cos       | XXXXXXXXXX-----       | CP1E3Ly4Pl7cos_Platycis_cosnardi_amie.idba.135            | XXXXXXXXXX-----X--XXX     | CP1E3Ly4Pl7cos_Platycis_cosnardi_amie.idba.135_MERGED            |
| -XX-----X-XX-XXX    | CP1E3040m7fon        | -XXXXXXXXXXXX-----    | CP1E3040m7fon_Omalisus_fontisbellaquei_JX412744           | -XXXXXXXXXXXX-----XXX     | CP1E3040m7fon_Omalisus_fontisbellaquei_JX412744_MERGED           |
| -X-----X--XXX       | CP1E30m4Dr7str       | -XXXXXXXXXXXX-----    | CP1E30m4Dr7str_Drilonius_striatulus_JX412822              | -XXXXXXXXXXXX-----XXX     | CP1E30m4Dr7str_Drilonius_striatulus_JX412822_MERGED              |
| XXXXXXX-XXXXX---    | CP1E3P4R5Rh7luf      | XXXXXXXXXXXXXXXX----- | CP1E3P4R5Rh7luf_Rhagophthalmus_lufengensis_NC_010969      | XXXXXXXXXXXXXXXX-----     | CP1E3P4R5Rh7luf_Rhagophthalmus_lufengensis_NC_010969_MERGED      |
| XXXXXXXXXXXX-XXX-   | CP1E3P4R5Rh7ohb      | XXXXXXXXXXXXXXXX----- | CP1E3P4R5Rh7ohb_Rhagophthalmus_ohbai_NC_010964            | XXXXXXXXXXXXXXXX-----X-   | CP1E3P4R5Rh7ohb_Rhagophthalmus_ohbai_NC_010964_MERGED            |
| -XX-----X--XXX      | CP1E3T4Tr7der        | XXXXXXXXXXXXXXXX----- | CP1E3T4Tr7der_Trixaqus_dermestoides_BIUK.idba.35          | XXXXXXXXXXXXXXXX-----XXX  | CP1E3T4Tr7der_Trixaqus_dermestoides_BIUK.idba.35_MERGED          |
| -X-----             | CP1H3H4H5Be7aff      | XXXXXXXXXXXXXXXX----- | CP1H3H4H5Be7aff_Berosus_affinis_1VWB.idba.9               | XXXXXXXXXXXXXXXX-----     | CP1H3H4H5Be7aff_Berosus_affinis_1VWB.idba.9_MERGED               |
| -XX-----X-X-XXX     | CP1H3H4H5Cy7mar      | XXXXXXXXXXXXXXXX----- | CP1H3H4H5Cy7mar_Cymbiodyta_marginella_amie.idba.89        | XXXXXXXXXXXXXXXX-----XXX  | CP1H3H4H5Cy7mar_Cymbiodyta_marginella_amie.idba.89_MERGED        |
| -XX-----            | CP1H3H4S5Ce7uni      | XXXXXXXXXXXXXXXX----- | CP1H3H4S5Ce7uni_Cercyon_unipunctatus_amie.idba.9          | XXXXXXXXXXXXXXXX-----     | CP1H3H4S5Ce7uni_Cercyon_unipunctatus_amie.idba.9_MERGED          |
| -XXX-----XX-        | CP1H3H4S5Cr7min      | XXXXXXXXXXXXXXXX----- | CP1H3H4S5Cr7min_Cryptopleurum_minutum_Staph.idba.52       | XXXXXXXXXXXXXXXX-----X-   | CP1H3H4S5Cr7min_Cryptopleurum_minutum_Staph.idba.52_MERGED       |
| -X-----             | CP1H3H4S5Da7abd      | XXXXXXXXXXXXXXXX----- | CP1H3H4S5Da7abd_Dactylosternum_abdominale_amie.idba.74    | XXXXXXXXXXXXXXXX-----     | CP1H3H4S5Da7abd_Dactylosternum_abdominale_amie.idba.74_MERGED    |
| -XX-----X-X-XXX     | CP1H3H4S5Sp7bip      | XXXXXXXXXXXXXXXX----- | CP1H3H4S5Sp7bip_Sphaeridium_bipustulatum_Staph.idba.49    | XXXXXXXXXXXXXXXX-----XXX  | CP1H3H4S5Sp7bip_Sphaeridium_bipustulatum_Staph.idba.49_MERGED    |
| -XX-----XXX-XX-     | CP1H3Hy4Hy7car       | XXXXXXXXXXXXXXXX----- | CP1H3Hy4Hy7car_Hydrochus_carinatus_729517_idba_contig_25  | XXXXXXXXXXXXXXXX-----X-   | CP1H3Hy4Hy7car_Hydrochus_carinatus_729517_idba_contig_25_MERGED  |
| -X-----             | CP1H13H4D5P6Ki7min   | XXXXXXXXXXXXXXXX----- | CP1H13H4D5P6Ki7min_Kissister_minimus_Soil.idba.27         | XXXXXXXXXXXXXXXX-----X-   | CP1H13H4D5P6Ki7min_Kissister_minimus_Soil.idba.27_MERGED         |
| -XX-----XXX         | CP1H13H4D5P6Pa7f1a   | -XXXXXXXXXXXX-----    | CP1H13H4D5P6Pa7f1a_Paromalus_flavicornis_JX412766         | -XXXXXXXXXXXX-----XXX     | CP1H13H4D5P6Pa7f1a_Paromalus_flavicornis_JX412766_MERGED         |
| -X-----             | CP1H13H4H5Hi6Mar7mer | XXXXXXXXXXXXXXXX----- | CP1H13H4H5Hi6Mar7mer_Margarinotus_merdarius_Staph.idba.57 | XXXXXXXXXXXXXXXX-----     | CP1H13H4H5Hi6Mar7mer_Margarinotus_merdarius_Staph.idba.57_MERGED |
| XXXXXXXXXXXX-XXX-   | CP1H13H4S5Eu7sci     | XXXXXXXXXXXXXXXX----- | CP1H13H4S5Eu7sci_Euspilotus_scissus_NC_018353             | XXXXXXXXXXXXXXXX-----X-   | CP1H13H4S5Eu7sci_Euspilotus_scissus_NC_018353_MERGED             |
| -XX-----XXX         | CP1L3L4Hy7der        | -XXXXXXXXXXXX-----    | CP1L3L4Hy7der_Hylecoetus_dermestoides_HQ232820            | -XXXXXXXXXXXX-----XXX     | CP1L3L4Hy7der_Hylecoetus_dermestoides_HQ232820_MERGED            |
| -XX-----XX-XX-      | CP1L3L4Ly7nav        | XXXXXXXXXXXXXXXX----- | CP1L3L4Ly7nav_Lymexylon_navale_idba.55                    | XXXXXXXXXXXXXXXX-----X-   | CP1L3L4Ly7nav_Lymexylon_navale_idba.55_MERGED                    |
| -X-----XX-XX-       | CP1S3H4Me7MEM1       | XXXXXXXXXXXXXXXX----- | CP1S3H4Me7MEM1_Meropathus_MEM1_675618_idba_contig_21      | XXXXXXXXXXXXXXXX-----X-   | CP1S3H4Me7MEM1_Meropathus_MEM1_675618_idba_contig_21_MERGED      |
| -X-----XX-          | CP1S3L4C5Ag7lab      | -XXXXXXXXXXXX-----    | CP1S3L4C5Ag7lab_Agyrtodes_labralis_JX412779               | -XXXXXXXXXXXX-----X-      | CP1S3L4C5Ag7lab_Agyrtodes_labralis_JX412779_MERGED               |
| -X-----             | CP1S3L4Ch5Ca7cor     | XXXXXXXXXXXXXXXX----- | CP1S3L4Ch5Ca7cor_Catops_coracinus_BIUK.idba.2             | XXXXXXXXXXXXXXXX-----     | CP1S3L4Ch5Ca7cor_Catops_coracinus_BIUK.idba.2_MERGED             |
| -X-----XX-XXX       | CP1S3L4Ch5Es7jea     | XXXXXX-----           | CP1S3L4Ch5Es7jea_Espnoliella_jeanneli_Staph.idba.86       | XXXXXX-----XX-XXX         | CP1S3L4Ch5Es7jea_Espnoliella_jeanneli_Staph.idba.86_MERGED       |
| -XX-----XX-XX-      | CP1S3L4Ch5Na7ve1     | -XXXXXXXXXXXX-----    | CP1S3L4Ch5Na7ve1_Nargus_velox_JX313674                    | -XXXXXXXXXXXX-----X-      | CP1S3L4Ch5Na7ve1_Nargus_velox_JX313674_MERGED                    |
| -X-----XX-----      | CP1S3L4Ch5Pha7fra    | XXXXXXXXXXXXXXXX----- | CP1S3L4Ch5Pha7fra_Phacomorphus_fratryi_Staph.idba.18      | XXXXXXXXXXXXXXXX-----     | CP1S3L4Ch5Pha7fra_Phacomorphus_fratryi_Staph.idba.18_MERGED      |
| -X-----XX-X-X-      | CP1S3L4Ch5Pt7ten     | XXXXXXXXXXXXXXXX----- | CP1S3L4Ch5Pt7ten_Ptomaphagus_tenuicornis_Soil.idba.24     | XXXXXXXXXXXXXXXX-----X-X- | CP1S3L4Ch5Pt7ten_Ptomaphagus_tenuicornis_Soil.idba.24_MERGED     |
| -XX-----X-XX-XXX    | CP1S3L4Ch5Sc7wat     | XXXXXXXXXXXXXXXX----- | CP1S3L4Ch5Sc7wat_Sciodrepoides_watsoni_Staph.idba.6       | XXXXXXXXXXXXXXXX-----XXX  | CP1S3L4Ch5Sc7wat_Sciodrepoides_watsoni_Staph.idba.6_MERGED       |
| -X-----X-XX-X-X     | CP1S3L4Ch5Tr7oro     | XXXXXXXXXXXXXXXX----- | CP1S3L4Ch5Tr7oro_Trapezodirus_oroobios_Staph.idba.25      | XXXXXXXXXXXXXXXX-----X-X  | CP1S3L4Ch5Tr7oro_Trapezodirus_oroobios_Staph.idba.25_MERGED      |
| -XX-----            | CP1S3L4L5Ag7atr      | XXXXXXXXXXXXXXXX----- | CP1S3L4L5Ag7atr_Agathidium_atrum_BIUK.idba.3              | XXXXXXXXXXXXXXXX-----     | CP1S3L4L5Ag7atr_Agathidium_atrum_BIUK.idba.3_MERGED              |
| -XX-----XX-         | CP1S3L4L5An7hum      | -XXXXXXXXXXXX-----    | CP1S3L4L5An7hum_Anisotoma_humeralis_amie.idba.93          | -XXXXXXXXXXXX-----XX-     | CP1S3L4L5An7hum_Anisotoma_humeralis_amie.idba.93_MERGED          |
| -X-----             | CP1S3L4L5Le7pic      | XXXXXX-----           | CP1S3L4L5Le7pic_Leiodes_picea_amie.idba.151               | XXXXXX-----               | CP1S3L4L5Le7pic_Leiodes_picea_amie.idba.151_MERGED               |
| -X-----             | CP1S3L4L5Tr7mae      | XXXXXXXXXXXXXXXX----- | CP1S3L4L5Tr7mae_Triarthron_maerkelii_amie.idba.15         | XXXXXXXXXXXXXXXX-----     | CP1S3L4L5Tr7mae_Triarthron_maerkelii_amie.idba.15_MERGED         |
| -XX-----            | CP1S3P4A5Ac7ins      | -XXXXXXXXXXXX-----    | CP1S3P4A5Ac7ins_Acrotrichis_insularis_BIUK.idba.28        | -XXXXXXXXXXXX-----        | CP1S3P4A5Ac7ins_Acrotrichis_insularis_BIUK.idba.28_MERGED        |

|              |                    |                       |                                                         |                       |                                                                |
|--------------|--------------------|-----------------------|---------------------------------------------------------|-----------------------|----------------------------------------------------------------|
| -XX- - - - - | CP1S3S4A5A6A17lan  | XXXXXXXXXXXXX- - - -  | CP1S3S4A5A6A17lan_Aleochara_lanuginosa_BIUk.idba.29     | XXXXXXXXXXXXX- - - -  | CP1S3S4A5A6A17lan_Aleochara_lanuginosa_BIUk.idba.29_MERGED     |
| -XX- - - - - | CP1S3S4A5A6A17ver  | - - XXXXX- - - - -    | CP1S3S4A5A6A17ver_Aleochara_verna_Staph.idba.93         | - XXXXX- - - - -      | CP1S3S4A5A6A17ver_Aleochara_verna_Staph.idba.93_MERGED         |
| -X- - - - -  | CP1S3S4A5A6A7obf   | XXXX- - - - -         | CP1S3S4A5A6A7obf_Acrotona_obfuscata_Staph.idba.85       | XXXX- - - - -         | CP1S3S4A5A6A7obf_Acrotona_obfuscata_Staph.idba.85_MERGED       |
| -XX- - - - - | CP1S3S4A5A6A7cur   | XXXXXXXXXXXXX- - - -  | CP1S3S4A5A6A7cur_Alloconota_currax_Staph.idba.39        | XXXXXXXXXXXXX- - - -  | CP1S3S4A5A6A7cur_Alloconota_currax_Staph.idba.39_MERGED        |
| -XX- - - - - | CP1S3S4A5A6A7ana   | XX- - - - -           | CP1S3S4A5A6A7ana_Amischa_analis_Staph.idba.70           | XXXX- - - - -         | CP1S3S4A5A6A7ana_Amischa_analis_Staph.idba.70_MERGED           |
| -X- - - - -  | CP1S3S4A5A6A7ami   | XXXXXXXXXXXXX- - - -  | CP1S3S4A5A6A7ami_Atheta_amicula_Staph.idba.42           | XXXXXXXXXXXXX- - - -  | CP1S3S4A5A6A7ami_Atheta_amicula_Staph.idba.42_MERGED           |
| -XX- - - - - | CP1S3S4A5A6A7cas   | XXXXXXXXXXXXX- - - -  | CP1S3S4A5A6A7cas_Atheta_castanoptera_BIUk.idba.6        | XXXXXXXXXXXXX- - - -  | CP1S3S4A5A6A7cas_Atheta_castanoptera_BIUk.idba.6_MERGED        |
| -X- - - - -  | CP1S3S4A5A6A7fun   | XXXXXXXXXXXXX- - - -  | CP1S3S4A5A6A7fun_Atheta_fungi_Soil.idba.12              | XXXXXXXXXXXXX- - - -  | CP1S3S4A5A6A7fun_Atheta_fungi_Soil.idba.12_MERGED              |
| -X- - - - -  | CP1S3S4A5A6A7fung  | XXXXXXXXXXXXX- - - -  | CP1S3S4A5A6A7fung_Atheta_fungivora_Staph.idba.37        | XXXXXXXXXXXXX- - - -  | CP1S3S4A5A6A7fung_Atheta_fungivora_Staph.idba.37_MERGED        |
| -XX- - - - - | CP1S3S4A5A6A7gag   | XXXXXXXXXXXXX- - - -  | CP1S3S4A5A6A7gag_Atheta_gagatina_Staph.idba.20          | XXXXXXXXXXXXX- - - -  | CP1S3S4A5A6A7gag_Atheta_gagatina_Staph.idba.20_MERGED          |
| -XX- - - - - | CP1S3S4A5A6A7hyp   | XXXXXXXXXXXXX- - - -  | CP1S3S4A5A6A7hyp_Atheta_hypnorum_BIUk.idba.4            | XXXXXXXXXXXXX- - - -  | CP1S3S4A5A6A7hyp_Atheta_hypnorum_BIUk.idba.4_MERGED            |
| -XX- - - - - | CP1S3S4A5A6A7vol   | -XXXXXXXXXXXXX- - - - | CP1S3S4A5A6A7vol_Atheta_volans_Staph.idba.63            | -XXXXXXXXXXXXX- - - - | CP1S3S4A5A6A7vol_Atheta_volans_Staph.idba.63_MERGED            |
| -XX- - - - - | CP1S3S4A5A6Ca7obs  | XXXXXXXXXXXXX- - - -  | CP1S3S4A5A6Ca7obs_Callicerus_obscurus_Staph.idba.39     | XXXXXXXXXXXXX- - - -  | CP1S3S4A5A6Ca7obs_Callicerus_obscurus_Staph.idba.39_MERGED     |
| -XX- - - - - | CP1S3S4A5A6Ge7cir  | XXXXXXXXXXXXX- - - -  | CP1S3S4A5A6Ge7cir_Geostiba_circellaris_BIUk.idba.25     | XXXXXXXXXXXXX- - - -  | CP1S3S4A5A6Ge7cir_Geostiba_circellaris_BIUk.idba.25_MERGED     |
| -XX- - - - - | CP1S3S4A5A6Li7mic  | XXXXXXXXXXXXX- - - -  | CP1S3S4A5A6Li7mic_Lioglutula_longiuscula_BIUk.idba.24   | XXXXXXXXXXXXX- - - -  | CP1S3S4A5A6Li7mic_Lioglutula_longiuscula_BIUk.idba.24_MERGED   |
| -XX- - - - - | CP1S3S4A5A6Mo7fun  | - - - - -             | CP1S3S4A5A6Mo7fun_Mocyta_fungi_BIUk.idba.80             | - - - - -             | CP1S3S4A5A6Mo7fun_Mocyta_fungi_BIUk.idba.80_MERGED             |
| -XX- - - - - | CP1S3S4A5B6Eu7opt  | XXXXXXXXXXXXX- - - -  | CP1S3S4A5B6Eu7opt_Euryusa_optabilis_Staph.idba.22       | XXXXXXXXXXXXX- - - -  | CP1S3S4A5B6Eu7opt_Euryusa_optabilis_Staph.idba.22_MERGED       |
| -XX- - - - - | CP1S3S4A5Lo6Lo7pub | XXXXXXXXXXXXX- - - -  | CP1S3S4A5Lo6Lo7pub_Lomechusa_publicollis_Soil.idba.4    | XXXXXXXXXXXXX- - - -  | CP1S3S4A5Lo6Lo7pub_Lomechusa_publicollis_Soil.idba.4_MERGED    |
| -XX- - - - - | CP1S3S4A5O6Cr7sut  | -XXXXXXXXXXXXX- - - - | CP1S3S4A5O6Cr7sut_Crataraea_suturalis_Staph.idba.50     | -XXXXXXXXXXXXX- - - - | CP1S3S4A5O6Cr7sut_Crataraea_suturalis_Staph.idba.50_MERGED     |
| -XX- - - - - | CP1S3S4A5O6De7cor  | XXXXXXXXXXXXX- - - -  | CP1S3S4A5O6De7cor_Dexiogyia_corticina_Staph.idba.34     | XXXXXXXXXXXXX- - - -  | CP1S3S4A5O6De7cor_Dexiogyia_corticina_Staph.idba.34_MERGED     |
| -XX- - - - - | CP1S3S4A5O6Ox7acu  | XXXXXXXXXXXXX- - - -  | CP1S3S4A5O6Ox7acu_Oxypoda_acuminata_BIUk.idba.20        | XXXXXXXXXXXXX- - - -  | CP1S3S4A5O6Ox7acu_Oxypoda_acuminata_BIUk.idba.20_MERGED        |
| -X- - - - -  | CP1S3S4A5O6Ox7bre  | XXXXXXXXXXXXX- - - -  | CP1S3S4A5O6Ox7bre_Oxypoda_brevicornis_BIUk.idba.22      | XXXXXXXXXXXXX- - - -  | CP1S3S4A5O6Ox7bre_Oxypoda_brevicornis_BIUk.idba.22_MERGED      |
| -XX- - - - - | CP1S3S4A5O6Ox7lon  | XXXXXXXXXXXXX- - - -  | CP1S3S4A5O6Ox7lon_Oxypoda_longipes_Staph.idba.36        | XXXXXXXXXXXXX- - - -  | CP1S3S4A5O6Ox7lon_Oxypoda_longipes_Staph.idba.36_MERGED        |
| -XX- - - - - | CP1S3S4A5O6Ox7opa  | X-XXXXXXX-XXXX- - -   | CP1S3S4A5O6Ox7opa_Oxypoda_opaca_JX412751                | XXXXXXXXXX-XXXX- - -  | CP1S3S4A5O6Ox7opa_Oxypoda_opaca_JX412751_MERGED                |
| -XX- - - - - | CP1S3S4A5O6Par7lon | - - XXXXXXXX- - - -   | CP1S3S4A5O6Par7lon_Parocycusa_longitarsis_JX313678      | - - XXXXXXXX- - - -   | CP1S3S4A5O6Par7lon_Parocycusa_longitarsis_JX313678_MERGED      |
| -XX- - - - - | CP1S3S4A5O6Ph7tes  | -XXXXXXX- - - - -     | CP1S3S4A5O6Ph7tes_Phloeopora_testacea_Staph.idba.81     | -XXXXXXX- - - - -     | CP1S3S4A5O6Ph7tes_Phloeopora_testacea_Staph.idba.81_MERGED     |
| -XX- - - - - | CP1S3S4A5T6Da7fal  | XXXXXXXXXXXXX- - - -  | CP1S3S4A5T6Da7fal_Dacrila_fallax_Staph.idba.43          | XXXXXXXXXXXXX- - - -  | CP1S3S4A5T6Da7fal_Dacrila_fallax_Staph.idba.43_MERGED          |
| -XX- - - - - | CP1S3S4A5T6Th7atr  | XXXXXXXXXXXXX- - - -  | CP1S3S4A5T6Th7atr_Thinonoma_atra_Staph.idba.40          | XXXXXXXXXXXXX- - - -  | CP1S3S4A5T6Th7atr_Thinonoma_atra_Staph.idba.40_MERGED          |
| -XX- - - - - | CP1S3S4Eu5Eu7ruf   | XXXXXXXXXXXXX- - - -  | CP1S3S4Eu5Eu7ruf_Euaesthetus_ruficapillus_Staph.idba.45 | XXXXXXXXXXXXX- - - -  | CP1S3S4Eu5Eu7ruf_Euaesthetus_ruficapillus_Staph.idba.45_MERGED |
| -XX- - - - - | CP1S3S4H5Ha7cap    | XXXXXXXXXXXXX- - - -  | CP1S3S4H5Ha7cap_Habrocerus_capillaricornis_JX412795     | XXXXXXXXXXXXX- - - -  | CP1S3S4H5Ha7cap_Habrocerus_capillaricornis_JX412795_MERGED     |
| -XX- - - - - | CP1S3S4O5An7atr    | XXXXXXX- - - - -      | CP1S3S4O5An7atr_Anthobium_atrocephalum_BIUk.idba.67     | XXXXXXX- - - - -      | CP1S3S4O5An7atr_Anthobium_atrocephalum_BIUk.idba.67_MERGED     |
| -X- - - - -  | CP1S3S4O5An7mel    | XXXXXXXXXXXXX- - - -  | CP1S3S4O5An7mel_Anthobium_melanocephalum_ameie.idba.2   | XXXXXXXXXXXXX- - - -  | CP1S3S4O5An7mel_Anthobium_melanocephalum_ameie.idba.2_MERGED   |
| -X- - - - -  | CP1S3S4O5Eu7tor    | XXXXXXXXXXXXX- - - -  | CP1S3S4O5Eu7tor_Euspalerum_torquatum_Staph.idba.31      | XXXXXXXXXXXXX- - - -  | CP1S3S4O5Eu7tor_Euspalerum_torquatum_Staph.idba.31_MERGED      |
| - - - - -    | CP1S3S4O5Ne7bru    | XXXXXXXXXXXXX- - - -  | CP1S3S4O5Ne7bru_Neophonus_bruchi_Staph.idba.0           | XXXXXXXXXXXXX- - - -  | CP1S3S4O5Ne7bru_Neophonus_bruchi_Staph.idba.0_MERGED           |
| -X- - - - -  | CP1S3S4O5O17pic    | XXXXXXXXXXXXX- - - -  | CP1S3S4O5O17pic_Olophrum_piceum_Staph.idba.35           | XXXXXXXXXXXXX- - - -  | CP1S3S4O5O17pic_Olophrum_piceum_Staph.idba.35_MERGED           |
| -XX- - - - - | CP1S3S4O5Om7riv    | -XXXXXXXXXXXXX- - - - | CP1S3S4O5Om7riv_Omalium_rivulare_JX412759               | -XXXXXXXXXXXXX- - - - | CP1S3S4O5Om7riv_Omalium_rivulare_JX412759_MERGED               |
| -XX- - - - - | CP1S3S4O5Om7rug    | XXXXXXXXXXXXX- - - -  | CP1S3S4O5Om7rug_Omalium_rugatum_BIUk.idba.7             | XXXXXXXXXXXXX- - - -  | CP1S3S4O5Om7rug_Omalium_rugatum_BIUk.idba.7_MERGED             |
| -X- - - - -  | CP1S3S4Ox5An7mut   | -XXXXXXXXXXXXX- - - - | CP1S3S4Ox5An7mut_Anotylus_mutator_BIUk.idba.48          | -XXXXXXXXXXXXX- - - - | CP1S3S4Ox5An7mut_Anotylus_mutator_BIUk.idba.48_MERGED          |
| -XX- - - - - | CP1S3S4Ox5An7scu   | -XXXXXXX- - - - -     | CP1S3S4Ox5An7scu_Anotylus_sculpturatus_Staph.idba.76    | -XXXXXXX- - - - -     | CP1S3S4Ox5An7scu_Anotylus_sculpturatus_Staph.idba.76_MERGED    |
| -X- - - - -  | CP1S3S4Ox5Ca7ful   | X-XXXXXXX- - - - -    | CP1S3S4Ox5Ca7ful_Carpelimus_fuliginosus_ameie.idba.60   | XXXXXXXXXXXXX- - - -  | CP1S3S4Ox5Ca7ful_Carpelimus_fuliginosus_ameie.idba.60_MERGED   |
| -X- - - - -  | CP1S3S4Ox5Ox7pic   | XXXXXXXXXXXXX- - - -  | CP1S3S4Ox5Ox7pic_Oxytelus_piceus_ameie.idba.86          | XXXXXXXXXXXXX- - - -  | CP1S3S4Ox5Ox7pic_Oxytelus_piceus_ameie.idba.86_MERGED          |
| -X- - - - -  | CP1S3S4P5As7lyo    | XXXXXXXXXXXXX- - - -  | CP1S3S4P5As7lyo_Astenus_lyonessius_Staph.idba.17        | XXXXXXXXXXXXX- - - -  | CP1S3S4P5As7lyo_Astenus_lyonessius_Staph.idba.17_MERGED        |
| -X- - - - -  | CP1S3S4P5Hy7deb    | -XXXXXXX- - - - -     | CP1S3S4P5Hy7deb_Hypomedon_debiliaricornis_JX313672      | -XXXXXXX- - - - -     | CP1S3S4P5Hy7deb_Hypomedon_debiliaricornis_JX313672_MERGED      |
| -XX- - - - - | CP1S3S4P5La7bru    | XXXXXXXXXXXXX- - - -  | CP1S3S4P5La7bru_Lathrobium_brunnipes_Staph.idba.10      | XXXXXXXXXXXXX- - - -  | CP1S3S4P5La7bru_Lathrobium_brunnipes_Staph.idba.10_MERGED      |
| -XX- - - - - | CP1S3S4P5La7ful    | XXXXXXX- - - - -      | CP1S3S4P5La7ful_Lathrobium_fulvipenne_BIUk.idba.70      | XXXXXXX- - - - -      | CP1S3S4P5La7ful_Lathrobium_fulvipenne_BIUk.idba.70_MERGED      |
| -XX- - - - - | CP1S3S4P5Me7api    | XXXXXXXXXXXXX- - - -  | CP1S3S4P5Me7api_Medon_apicalis_Staph.idba.9             | XXXXXXXXXXXXX- - - -  | CP1S3S4P5Me7api_Medon_apicalis_Staph.idba.9_MERGED             |
| -X- - - - -  | CP1S3S4P5Me7pic    | XXXXXXXXXXXXX- - - -  | CP1S3S4P5Me7pic_Medon_piceus_ameie.idba.112             | XXXXXXXXXXXXX- - - -  | CP1S3S4P5Me7pic_Medon_piceus_ameie.idba.112_MERGED             |
| -XX- - - - - | CP1S3S4P5Ru7gen    | XXXXXXXXXXXXX- - - -  | CP1S3S4P5Ru7gen_Rugilus_geniculatus_Staph.idba.38       | XXXXXXXXXXXXX- - - -  | CP1S3S4P5Ru7gen_Rugilus_geniculatus_Staph.idba.38_MERGED       |
| -X- - - - -  | CP1S3S4P5Su7mel    | XXXXXXXXXXXXX- - - -  | CP1S3S4P5Su7mel_Sunius_melanocephalus_Staph.idba.61     | XXXXXXXXXXXXX- - - -  | CP1S3S4P5Su7mel_Sunius_melanocephalus_Staph.idba.61_MERGED     |
| -XX- - - - - | CP1S3S4P5Te7ter    | XXXXXXXXXXXXX- - - -  | CP1S3S4P5Te7ter_Tetartopeus_terminatus_Staph.idba.27    | XXXXXXXXXXXXX- - - -  | CP1S3S4P5Te7ter_Tetartopeus_terminatus_Staph.idba.27_MERGED    |
| -XX- - - - - | CP1S3S4Ps5Bra7fos  | XXXXXXXXXXXXX- - - -  | CP1S3S4Ps5Bra7fos_Brachygluta_fossulata_BIUk.idba.21    | XXXXXXXXXXXXX- - - -  | CP1S3S4Ps5Bra7fos_Brachygluta_fossulata_BIUk.idba.21_MERGED    |
| -XX- - - - - | CP1S3S4Ps5Bra7hel  | XXXXXXX- - - - -      | CP1S3S4Ps5Bra7hel_Brachygluta_helferi_Staph.idba.82     | XXXXXXX- - - - -      | CP1S3S4Ps5Bra7hel_Brachygluta_helferi_Staph.idba.82_MERGED     |
| -X- - - - -  | CP1S3S4Ps5Ct7pic   | XXXXX- - - - -        | CP1S3S4Ps5Ct7pic_Ctenisodes_piceus_Staph.idba.88        | XXXXX- - - - -        | CP1S3S4Ps5Ct7pic_Ctenisodes_piceus_Staph.idba.88_MERGED        |
| -XX- - - - - | CP1S3S4Ps5Eu7pic   | -XXXXXXXXXXXXX- - - - | CP1S3S4Ps5Eu7pic_Euplectus_piceus_BIUk.idba.53          | -XXXXXXXXXXXXX- - - - | CP1S3S4Ps5Eu7pic_Euplectus_piceus_BIUk.idba.53_MERGED          |
| -XX- - - - - | CP1S3S4Ps5Ty7nig   | XXXXXXXXXXXXX- - - -  | CP1S3S4Ps5Ty7nig_Tychus_niger_BIUk.idba.17              | XXXXXXXXXXXXX- - - -  | CP1S3S4Ps5Ty7nig_Tychus_niger_BIUk.idba.17_MERGED              |



|                  |                     |                |                                                           |                      |                                                                  |
|------------------|---------------------|----------------|-----------------------------------------------------------|----------------------|------------------------------------------------------------------|
| --X-----         | CP1S3S4Q5Qu7nem     | XXXXXXXXXXXX   | CP1S3S4Q5Qu7nem_Quedius_nemoralis_BIUK.idba.5             | XXXXXXXXXXXX         | CP1S3S4Q5Qu7nem_Quedius_nemoralis_BIUK.idba.5_MERGED             |
| --X-----XX-      | CP1S3S4S5Br7lat     | --XXXXXXXX     | CP1S3S4S5Br7lat_Brachynopus_latus_JX412745                | --XXXXXXXX           | CP1S3S4S5Br7lat_Brachynopus_latus_JX412745_MERGED                |
| -XX-----XX-XXX   | CP1S3S4S5Sc7qua     | XXXXXXXXXXXX   | CP1S3S4S5Sc7qua_Scaphidium_quadrimaculatum_Staph.idba.5   | XXXXXXXXXXXX-XXX     | CP1S3S4S5Sc7qua_Scaphidium_quadrimaculatum_Staph.idba.5_MERGED   |
| -X-----          | CP1S3S4S5Sca7bol    | XXXXXXXXXXXX   | CP1S3S4S5Sca7bol_Scaphisoma_boleti_Staph.idba.55          | XXXXXXXXXXXX         | CP1S3S4S5Sca7bol_Scaphisoma_boleti_Staph.idba.55_MERGED          |
| -XX-----X-----   | CP1S3S4St5St7cla    | XXXXXXXXXXXX   | CP1S3S4St5St7cla_Stenus_clavicornis_2VGB.idba.1           | XXXXXXXXXXXX         | CP1S3S4St5St7cla_Stenus_clavicornis_2VGB.idba.1_MERGED           |
| -X-----X-----    | CP1S3S4St5St7com    | XXXXXXXXXXXX   | CP1S3S4St5St7com_Stenus_comma_Staph.idba.58               | XXXXXXXXXXXX         | CP1S3S4St5St7com_Stenus_comma_Staph.idba.58_MERGED               |
| -XX-----XX-      | CP1S3S4St506At7aff  | XXXXXXXXXXXX   | CP1S3S4St506At7aff_Atreucus_affinis_Staph.idba.41         | XXXXXXXXXXXX-XX-     | CP1S3S4St506At7aff_Atreucus_affinis_Staph.idba.41_MERGED         |
| -XX-----         | CP1S3S4St5060t7lae  | XXXXXX         | CP1S3S4St5060t7lae_Othius_laeviusculus_amei.idba.150      | XXXXXX               | CP1S3S4St5060t7lae_Othius_laeviusculus_amei.idba.150_MERGED      |
| -XX-----         | CP1S3S4St5060t7pun  | XXXXXX         | CP1S3S4St5060t7pun_Othius_punctulatus_Soil.idba.158       | XXXXXX               | CP1S3S4St5060t7pun_Othius_punctulatus_Soil.idba.158_MERGED       |
| -XX-----         | CP1S3S4St5066a7pil  | XXXXXXXXXXXX   | CP1S3S4St5066a7pil_Gabrius_piliger_Staph.idba.12          | XXXXXXXXXXXX         | CP1S3S4St5066a7pil_Gabrius_piliger_Staph.idba.12_MERGED          |
| -XX-----         | CP1S3S4St5066B7sor  | XXXXXXXXXXXX   | CP1S3S4St5066B7sor_Bisnius_sordidus_Staph.idba.16         | XXXXXXXXXXXX         | CP1S3S4St5066B7sor_Bisnius_sordidus_Staph.idba.16_MERGED         |
| -X-----          | CP1S3S4St5066ab7the | XXXXXXXXXXXX   | CP1S3S4St5066ab7the_Gabronthus_thermarum_Staph.idba.53    | XXXXXXXXXXXX         | CP1S3S4St5066ab7the_Gabronthus_thermarum_Staph.idba.53_MERGED    |
| -----XX-         | CP1S3S4St5066Ne7vil | XXXXXXXXXXXX   | CP1S3S4St5066Ne7vil_Neobisnius_villosulus_Staph.idba.1    | XXXXXXXXXXXX-XX-     | CP1S3S4St5066Ne7vil_Neobisnius_villosulus_Staph.idba.1_MERGED    |
| -XX-----         | CP1S3S4St5060c7aet  | XXXXXXXXXXXX   | CP1S3S4St5060c7aet_Ocypus_aethiops_Soil.idba.34           | XXXXXXXXXXXX         | CP1S3S4St5060c7aet_Ocypus_aethiops_Soil.idba.34_MERGED           |
| -X-----          | CP1S3S4St5060c7bru  | XXXXXXXXXXXX   | CP1S3S4St5060c7bru_Ocypus_brunnipes_Staph.idba.56         | XXXXXXXXXXXX         | CP1S3S4St5060c7bru_Ocypus_brunnipes_Staph.idba.56_MERGED         |
| -XX-----         | CP1S3S4St5060c7ole  | XXXXXXXXXXXX   | CP1S3S4St5060c7ole_Ocypus_olens_2VGB.idba.7               | XXXXXXXXXXXX         | CP1S3S4St5060c7ole_Ocypus_olens_2VGB.idba.7_MERGED               |
| -XX-----XX-      | CP1S3S4St5060c7oph  | XXXXXXXXXXXX   | CP1S3S4St5060c7oph_Ocypus_ophthalmicus_amei.idba.21       | XXXXXXXXXXXX-XX-     | CP1S3S4St5060c7oph_Ocypus_ophthalmicus_amei.idba.21_MERGED       |
| -XX-----XX-      | CP1S3S4St5060n7tes  | XXXXXXXXXXXX   | CP1S3S4St5060n7tes_Ontholestes_tessellatus_amei.idba.69   | XXXXXXXXXXXX-XX-     | CP1S3S4St5060n7tes_Ontholestes_tessellatus_amei.idba.69_MERGED   |
| -XX-----XX-      | CP1S3S4St506Ph7fim  | XXXXXXXXXXXX   | CP1S3S4St506Ph7fim_Philonthus_fimatarius_Staph.idba.11    | XXXXXXXXXXXX-XX-     | CP1S3S4St506Ph7fim_Philonthus_fimatarius_Staph.idba.11_MERGED    |
| -X-----          | CP1S3S4St506Ta7mor  | XXXXXXXXXXXX   | CP1S3S4St506Ta7mor_Tasgius_morsitans_Staph.idba.32        | XXXXXXXXXXXX         | CP1S3S4St506Ta7mor_Tasgius_morsitans_Staph.idba.32_MERGED        |
| -XX-----         | CP1S3S4St506Gy7fra  | XXXXXXXXXXXX   | CP1S3S4St506Gy7fra_Gyrohypnus_fracticornis_Staph.idba.29  | XXXXXXXXXXXX         | CP1S3S4St506Gy7fra_Gyrohypnus_fracticornis_Staph.idba.29_MERGED  |
| -X-----XX-       | CP1S3S4St506Nu7len  | XXXXXX         | CP1S3S4St506Nu7len_Nudobius_lentus_Staph.idba.72          | XXXXXX-XX-           | CP1S3S4St506Nu7len_Nudobius_lentus_Staph.idba.72_MERGED          |
| -X-----          | CP1S3S4T5b07cas     | XXXXXXXXXXXX   | CP1S3S4T5b07cas_Bolitobius_castaneus_BIUK.idba.14         | XXXXXXXXXXXX         | CP1S3S4T5b07cas_Bolitobius_castaneus_BIUK.idba.14_MERGED         |
| -X-----          | CP1S3S4T5L07exo     | XXXXXXXXXXXX   | CP1S3S4T5L07exo_Lordithon_exoletus_amei.idba.7            | XXXXXXXXXXXX         | CP1S3S4T5L07exo_Lordithon_exoletus_amei.idba.7_MERGED            |
| -X-----XX-       | CP1S3S4T5Se7bip     | XXXXXXXXXXXX   | CP1S3S4T5Se7bip_Sepedophilus_bipunctatus_Staph.idba.23    | XXXXXXXXXXXX-XX-     | CP1S3S4T5Se7bip_Sepedophilus_bipunctatus_Staph.idba.23_MERGED    |
| -XX-----         | CP1S3S4T5Ta7chr     | XXXXXXXXXXXX   | CP1S3S4T5Ta7chr_Tachyporus_chrysomelinus_Soil.idba.10     | XXXXXXXXXXXX         | CP1S3S4T5Ta7chr_Tachyporus_chrysomelinus_Soil.idba.10_MERGED     |
| -X-----          | CP1S3S4T5Tac7lat    | XXXXXXXXXXXX   | CP1S3S4T5Tac7lat_Tachinus_laticollis_BIUK.idba.8          | XXXXXXXXXXXX         | CP1S3S4T5Tac7lat_Tachinus_laticollis_BIUK.idba.8_MERGED          |
| -XX-----         | CP1S3S4T5Tac7sub    | XXXXXXXXXXXX   | CP1S3S4T5Tac7sub_Tachinus_subterraneus_amei.idba.1        | XXXXXXXXXXXX         | CP1S3S4T5Tac7sub_Tachinus_subterraneus_amei.idba.1_MERGED        |
| -XX-----XX-      | CP1S3Sc4Ce7gal      | XXXXXX         | CP1S3Sc4Ce7gal_Cephennium_gallicum_BIUK.idba.66           | XXXXXX-XX-           | CP1S3Sc4Ce7gal_Cephennium_gallicum_BIUK.idba.66_MERGED           |
| XXXXXXXXXXXX-XX- | CP1S3S14S5Ne7ame    | XXXXXXXXXXXX   | CP1S3S14S5Ne7ame_Necrophila_americae_NC_018352            | XXXXXXXXXXXX-XX-     | CP1S3S14S5Ne7ame_Necrophila_americae_NC_018352_MERGED            |
| -X-----          | CP1S3S14S5S17tyr    | XXXXXXXXXXXX   | CP1S3S14S5S17tyr_Silpha_tyrolensis_amei.idba.102          | XXXXXXXXXXXX         | CP1S3S14S5S17tyr_Silpha_tyrolensis_amei.idba.102_MERGED          |
| -XX-----XX-XX-   | CP1Sc3Ge4An7ste     | --XXXXXXXX     | CP1Sc3Ge4An7ste_Anoplotrupes_stercorosus_JX412838         | --XXXXXXXX-XX-       | CP1Sc3Ge4An7ste_Anoplotrupes_stercorosus_JX412838_MERGED         |
| -XX-----XX-      | CP1Sc3L4Lu5Do7par   | XXXXXX         | CP1Sc3L4Lu5Do7par_Dorcus_parallepipodus_2VGB.idba.16      | XXXXXX-XX-           | CP1Sc3L4Lu5Do7par_Dorcus_parallepipodus_2VGB.idba.16_MERGED      |
| -XX-----         | CP1Sc3L4Lu5Lu7cer   | XXXXXXXXXXXX   | CP1Sc3L4Lu5Lu7cer_Lucanus_cervus_2VGB.idba.13             | XXXXXXXXXXXX         | CP1Sc3L4Lu5Lu7cer_Lucanus_cervus_2VGB.idba.13_MERGED             |
| XXXXXXXXXXXX-XX- | CP1Sc3L4Lu5Lu7maz   | XXXXXXXXXXXX-X | CP1Sc3L4Lu5Lu7maz_Lucanus_mazama_NC_013578                | XXXXXXXXXXXX-XX-     | CP1Sc3L4Lu5Lu7maz_Lucanus_mazama_NC_013578_MERGED                |
| -X-----X-X-X     | CP1Sc3L4S5Ce7chr    | XXXXXXXXXXXX   | CP1Sc3L4S5Ce7chr_Ceruchus_chrysomelinus_amei.idba.108     | XXXXXXXXXXXX-X-X-X   | CP1Sc3L4S5Ce7chr_Ceruchus_chrysomelinus_amei.idba.108_MERGED     |
| --XX-----        | CP1Sc3S4A5Ap7ele    | XXXXXXXXXXXX   | CP1Sc3S4A5Ap7ele_Aphodius_elevatus_Soil.idba.32           | XXXXXXXXXXXX         | CP1Sc3S4A5Ap7ele_Aphodius_elevatus_Soil.idba.32_MERGED           |
| -XX-----         | CP1Sc3S4A5Ap7foe    | -----XXXXXX    | CP1Sc3S4A5Ap7foe_Aphodius_foetens_amei.idba.115           | -XX-XXXXXX           | CP1Sc3S4A5Ap7foe_Aphodius_foetens_amei.idba.115_MERGED           |
| -XX-----         | CP1Sc3S4A5Ap7mer    | XXXXXXXXXXXX   | CP1Sc3S4A5Ap7mer_Aphodius_merdarius_Soil.idba.93          | XXXXXXXXXXXX         | CP1Sc3S4A5Ap7mer_Aphodius_merdarius_Soil.idba.93_MERGED          |
| -XX-----X-X-XXX  | CP1Sc3S4A5Ox7syl    | XXXXXXXXXXXX   | CP1Sc3S4A5Ox7syl_Oxyomus_sylvestris_amei.idba.121         | XXXXXXXXXXXX-X-X-XXX | CP1Sc3S4A5Ox7syl_Oxyomus_sylvestris_amei.idba.121_MERGED         |
| -XX-----X        | CP1Sc3S4A5Ple7cae   | XXXXXXXXXXXX   | CP1Sc3S4A5Ple7cae_Pleurophorus_caesus_Soil.idba.33        | XXXXXXXXXXXX         | CP1Sc3S4A5Ple7cae_Pleurophorus_caesus_Soil.idba.33_MERGED        |
| -X-----XX-XX     | CP1Sc3S4D5Cyp7val   | XXXXXXXXXXXX   | CP1Sc3S4D5Cyp7val_Cyphonistes_vallatus_JX412731           | XXXXXXXXXXXX-XX-XX   | CP1Sc3S4D5Cyp7val_Cyphonistes_vallatus_JX412731_MERGED           |
| XXXXXXXXXX-X-X-X | CP1Sc3S4M5Che17jan  | XXXXXXXXXXXX   | CP1Sc3S4M5Che17jan_Cheirotonus_jansoni_NC_023246          | XXXXXXXXXXXX         | CP1Sc3S4M5Che17jan_Cheirotonus_jansoni_NC_023246_MERGED          |
| -XX-----         | CP1Sc3S4M5Me7hip    | XXXXXXXXXXXX   | CP1Sc3S4M5Me7hip_Melolontha_hippocastani_amei.idba.79     | XXXXXXXXXXXX         | CP1Sc3S4M5Me7hip_Melolontha_hippocastani_amei.idba.79_MERGED     |
| XXXXXXXXXXXX-XX- | CP1Sc3S4M5Rh7mag    | XXXXXXXXXXXX   | CP1Sc3S4M5Rh7mag_Rhopaea_magnicornis_NC_013252            | XXXXXXXXXXXX-XX-     | CP1Sc3S4M5Rh7mag_Rhopaea_magnicornis_NC_013252_MERGED            |
| -XX-----XX-XXX   | CP1Sc3S4R5Ph7hor    | --XXXX         | CP1Sc3S4R5Ph7hor_Phyllopertha_horticola_amei.idba.189     | XXXXXX-XX-XXX        | CP1Sc3S4R5Ph7hor_Phyllopertha_horticola_amei.idba.189_MERGED     |
| -XX-----X-XX-X   | CP1Sc3S4S5Bu7bis    | XXXXXXXXXXXX   | CP1Sc3S4S5Bu7bis_Bubas_bison_CS.idba.2                    | XXXXXXXXXXXX         | CP1Sc3S4S5Bu7bis_Bubas_bison_CS.idba.2_MERGED                    |
| -XX-----X-X-X    | CP1Sc3S4S5Bu7bub    | XXXXXXXXXXXX   | CP1Sc3S4S5Bu7bub_Bubas_bubalus_CS.idba.14                 | XXXXXXXXXXXX-X-X-X   | CP1Sc3S4S5Bu7bub_Bubas_bubalus_CS.idba.14_MERGED                 |
| -----X-----      | CP1Sc3S4S5C6Ca7aeq  | XXXXXX         | CP1Sc3S4S5C6Ca7aeq_Canthon_aequinoctialis_Panama.idba.243 | XXXXXX-X-X-X         | CP1Sc3S4S5C6Ca7aeq_Canthon_aequinoctialis_Panama.idba.243_MERGED |
| -X-----X-XX-XXX  | CP1Sc3S4S5Ca7bin    | XXXXXXXXXXXX   | CP1Sc3S4S5Ca7bin_Caccobius_binodulus_CS.idba.46           | XXXXXXXXXXXX-XX-XXX  | CP1Sc3S4S5Ca7bin_Caccobius_binodulus_CS.idba.46_MERGED           |
| -X-----X-X-X     | CP1Sc3S4S5Ca7nig    | XXXXXXXXXXXX   | CP1Sc3S4S5Ca7nig_Caccobius_nigriritulus_CS.idba.25        | XXXXXXXXXXXX-XX-X-X  | CP1Sc3S4S5Ca7nig_Caccobius_nigriritulus_CS.idba.25_MERGED        |
| -X-----X-XX-XXX  | CP1Sc3S4S5Cl7con    | XXXXXX         | CP1Sc3S4S5Cl7con_Cleptocaccobius_convexifrons_CS.idba.80  | XXXXXX-X-XX-XXX      | CP1Sc3S4S5Cl7con_Cleptocaccobius_convexifrons_CS.idba.80_MERGED  |
| -----X-XX-XXX    | CP1Sc3S4S5Dig7dia   | XXXXXXXXXXXX   | CP1Sc3S4S5Dig7dia_Onthophagus_diabolicus_Scarab.idba.18   | XXXXXXXXXXXX-XX-XXX  | CP1Sc3S4S5Dig7dia_Onthophagus_diabolicus_Scarab.idba.18_MERGED   |
| -XX-----X-XX-XXX | CP1Sc3S4S5Dig7gaz   | XXXXXXXXXXXX   | CP1Sc3S4S5Dig7gaz_Digitonthophagus_gazella_Scarab.idba.8  | XXXXXXXXXXXX-XX-XXX  | CP1Sc3S4S5Dig7gaz_Digitonthophagus_gazella_Scarab.idba.8_MERGED  |
| -X-----X-XX-X    | CP1Sc3S4S5Dr7kir    | XXXXXXXXXXXX   | CP1Sc3S4S5Dr7kir_Drepanocerus_kirbyi_CS.idba.15           | XXXXXXXXXXXX-XX-X    | CP1Sc3S4S5Dr7kir_Drepanocerus_kirbyi_CS.idba.15_MERGED           |

|                   |                     |                    |                                                                 |                     |                                                                        |
|-------------------|---------------------|--------------------|-----------------------------------------------------------------|---------------------|------------------------------------------------------------------------|
| --X-----X----     | CP1Sc3S4S5Eu6Eu7car | XXXXXXXXXXXXX----  | CP1Sc3S4S5Eu6Eu7car_Cheironitis_hoplosternus_Scarab.idba.15     | XXXXXXXXXXXXX----   | CP1Sc3S4S5Eu6Eu7car_Cheironitis_hoplosternus_Scarab.idba.15_MERGED     |
| --X-----X----     | CP1Sc3S4S5Eu6Eu7foe | XXXXXXXXXXXXX----  | CP1Sc3S4S5Eu6Eu7foe_Eurysternus_foedus_Scarab.idba.1            | XXXXXXXXXXXXX----   | CP1Sc3S4S5Eu6Eu7foe_Eurysternus_foedus_Scarab.idba.1_MERGED            |
| --X-----X----     | CP1Sc3S4S5Eu6Eu7ham | XXXXXXXXXXXXX----  | CP1Sc3S4S5Eu6Eu7ham_Eurysternus_hamaticollis_CS.idba.53         | XXXXXXXXXXXXX----   | CP1Sc3S4S5Eu6Eu7ham_Eurysternus_hamaticollis_CS.idba.53_MERGED         |
| --X-----X----     | CP1Sc3S4S5Eu6Eu7inf | XXXXXXXXXXXXX----  | CP1Sc3S4S5Eu6Eu7inf_Eurysternus_inflexus_CS.idba.17             | XXXXXXXXXXXXX----   | CP1Sc3S4S5Eu6Eu7inf_Eurysternus_inflexus_CS.idba.17_MERGED             |
| -XX-----X----XX   | CP1Sc3S4S5Eu7ful    | XXXXXXXXXXXXX----  | CP1Sc3S4S5Eu7ful_Euoniticellus_fulvus_Scarab.idba.0             | XXXXXXXXXXXXX-XX    | CP1Sc3S4S5Eu7ful_Euoniticellus_fulvus_Scarab.idba.0_MERGED             |
| -XX-----X----XX   | CP1Sc3S4S5Eu7int    | XXXXXXXXXXXXX----  | CP1Sc3S4S5Eu7int_Euoniticellus_intermedius_CS.idba.5            | XXXXXXXXXXXXX-XX    | CP1Sc3S4S5Eu7int_Euoniticellus_intermedius_CS.idba.5_MERGED            |
| --X-----X----XX   | CP1Sc3S4S5Euon7car  | -XXXXXXXXXXXXX---- | CP1Sc3S4S5Euon7car_Onthophagus_carbonarius_Scarab.idba.19       | -XXXXXXXXXXXXX-XX   | CP1Sc3S4S5Euon7car_Onthophagus_carbonarius_Scarab.idba.19_MERGED       |
| --X-----X-XX-XX   | CP1Sc3S4S5Hel7qua   | XXXX-----XX-XX     | CP1Sc3S4S5Hel7qua_Helictopleurus_quadripunctatus_CS.idba.79     | XXXX-----X-XX-XX    | CP1Sc3S4S5Hel7qua_Helictopleurus_quadripunctatus_CS.idba.79_MERGED     |
| --X-----X----XX   | CP1Sc3S4S5Het7cas   | XXXXXXXXXXXXX----  | CP1Sc3S4S5Het7cas_Heteronitis_castelnaui_CS.idba.56             | XXXXXXXXXXXXX-XX    | CP1Sc3S4S5Het7cas_Heteronitis_castelnaui_CS.idba.56_MERGED             |
| --X-----X----XX   | CP1Sc3S4S5Hy7alc    | XXXXXXXXXXXXX----  | CP1Sc3S4S5Hy7alc_Hyalonthophagus_alcyon_CS.idba.42              | XXXXXXXXXXXXX-XX    | CP1Sc3S4S5Hy7alc_Hyalonthophagus_alcyon_CS.idba.42_MERGED              |
| --X-----X----XX   | CP1Sc3S4S5Li7mil    | --XXXXXXXX-----    | CP1Sc3S4S5Li7mil_Liatongus_militaris_Scarab.idba.22             | --XXXXXXXX-X----    | CP1Sc3S4S5Li7mil_Liatongus_militaris_Scarab.idba.22_MERGED             |
| --X-----X----XX   | CP1Sc3S4S5Mi7api    | XXXXXXXXXXXXX----  | CP1Sc3S4S5Mi7api_Millichus_apicalis_CS.idba.13                  | XXXXXXXXXXXXX-XX    | CP1Sc3S4S5Mi7api_Millichus_apicalis_CS.idba.13_MERGED                  |
| --X-----X----XX   | CP1Sc3S4S5On7ale    | XXXXXXXXXXXX-----  | CP1Sc3S4S5On7ale_Onitis_alexis_CS.idba.60                       | XXXXXXXXXXXX-X----  | CP1Sc3S4S5On7ale_Onitis_alexis_CS.idba.60_MERGED                       |
| --X-----X----XX   | CP1Sc3S4S5On7caf    | XXXXXXXXXXXXX----  | CP1Sc3S4S5On7caf_Onitis_caffer_CS.idba.6                        | XXXXXXXXXXXXX-XX    | CP1Sc3S4S5On7caf_Onitis_caffer_CS.idba.6_MERGED                        |
| --X-----X----XX   | CP1Sc3S4S5On7fal    | XXXXXXXXXXXXX----  | CP1Sc3S4S5On7fal_Onitis_falcatus_CS.idba.22                     | XXXXXXXXXXXXX-XX    | CP1Sc3S4S5On7fal_Onitis_falcatus_CS.idba.22_MERGED                     |
| -XX-----X----XX   | CP1Sc3S4S5On7ful    | -----XXXXXXXX----  | CP1Sc3S4S5On7ful_Onitis_fulgidus_CS.idba.62                     | -----XXXXXXXX-XX    | CP1Sc3S4S5On7ful_Onitis_fulgidus_CS.idba.62_MERGED                     |
| --X-----X----XX   | CP1Sc3S4S5On7egr    | XXXXXXXXXXXXX----  | CP1Sc3S4S5On7egr_Oniticellus_egregius_CS.idba.9                 | XXXXXXXXXXXXX-XX    | CP1Sc3S4S5On7egr_Oniticellus_egregius_CS.idba.9_MERGED                 |
| --X-----X----XX   | CP1Sc3S4S5On7bid    | -----XXXXXXXX----  | CP1Sc3S4S5On7bid_Onthophagus_bidentatus_CS.idba.77              | --X-----XXXXX----   | CP1Sc3S4S5On7bid_Onthophagus_bidentatus_CS.idba.77_MERGED              |
| -XX-----XX----X   | CP1Sc3S4S5On7cly    | XXXXXXXXXXXXX----  | CP1Sc3S4S5On7cly_Onthophagus_clypeatus_CS.idba.50               | XXXXXXXXXXXXX-XX    | CP1Sc3S4S5On7cly_Onthophagus_clypeatus_CS.idba.50_MERGED               |
| -XX-----XX----X   | CP1Sc3S4S5On7coe    | XXXXXXXXXXXXX----  | CP1Sc3S4S5On7coe_Onthophagus_coenobita_CS.idba.24               | XXXXXXXXXXXXX-XX    | CP1Sc3S4S5On7coe_Onthophagus_coenobita_CS.idba.24_MERGED               |
| --X-----X----XX   | CP1Sc3S4S5On7fim    | XXXXXXXXXXXXX----  | CP1Sc3S4S5On7fim_Onthophagus_fimetarius_Scarab.idba.6           | XXXXXXXXXXXXX-XX    | CP1Sc3S4S5On7fim_Onthophagus_fimetarius_Scarab.idba.6_MERGED           |
| --X-----X----XX   | CP1Sc3S4S5On7gra    | XXXXXXXXXXXXX----  | CP1Sc3S4S5On7gra_Onthophagus_gracillipes_Scarab.idba.3          | XXXXXXXXXXXXX-XX    | CP1Sc3S4S5On7gra_Onthophagus_gracillipes_Scarab.idba.3_MERGED          |
| -XX-----XX----X   | CP1Sc3S4S5On7hae    | XXXXXXXXXXXXX----  | CP1Sc3S4S5On7hae_Onthophagus_haematopus_CS.idba.41              | XXXXXXXXXXXXX-XX    | CP1Sc3S4S5On7hae_Onthophagus_haematopus_CS.idba.41_MERGED              |
| --XX-----XX----   | CP1Sc3S4S5On7lat    | -XXXXXXXXXXXXX---- | CP1Sc3S4S5On7lat_Onthophagus_laticollis_Scarab.idba.13          | -XXXXXXXXXXXXX----  | CP1Sc3S4S5On7lat_Onthophagus_laticollis_Scarab.idba.13_MERGED          |
| --X-----X----XX   | CP1Sc3S4S5On7lon    | XXXXXXXXXXXXX----  | CP1Sc3S4S5On7lon_Onthophagus_longimanus_CS.idba.23              | XXXXXXXXXXXXX-XX    | CP1Sc3S4S5On7lon_Onthophagus_longimanus_CS.idba.23_MERGED              |
| --X-----X----XX   | CP1Sc3S4S5On7nit    | -XXXXXXXXXXXXX---- | CP1Sc3S4S5On7nit_Onthophagus_nitidior_CS.idba.10                | -XXXXXXXXXXXXX----  | CP1Sc3S4S5On7nit_Onthophagus_nitidior_CS.idba.10_MERGED                |
| --X-----X----XX   | CP1Sc3S4S5On7obs    | XXXXXXXXXXXXX----  | CP1Sc3S4S5On7obs_Onthophagus_obscurior_CS.idba.31               | XXXXXXXXXXXXX-XX    | CP1Sc3S4S5On7obs_Onthophagus_obscurior_CS.idba.31_MERGED               |
| -XX-----X----XX   | CP1Sc3S4S5On7och    | -----XXXX-----     | CP1Sc3S4S5On7och_Onthophagus_ochreatus_Scarab.idba.30           | -----XXXX-----      | CP1Sc3S4S5On7och_Onthophagus_ochreatus_Scarab.idba.30_MERGED           |
| --X-----X----XX   | CP1Sc3S4S5On7rhi    | XXXXXXXXXXXXX----  | CP1Sc3S4S5On7rhi_Onthophagus_rhinolophus_Scarab.idba.2          | XXXXXXXXXXXXX-XX    | CP1Sc3S4S5On7rhi_Onthophagus_rhinolophus_Scarab.idba.2_MERGED          |
| --X-----X----XX   | CP1Sc3S4S5On7ror    | XXXXXXXXXXXXX----  | CP1Sc3S4S5On7ror_Onthophagus_rorarius_CS.idba.1                 | XXXXXXXXXXXXX-XX    | CP1Sc3S4S5On7ror_Onthophagus_rorarius_CS.idba.1_MERGED                 |
| --X-----X----XX   | CP1Sc3S4S5On7sem    | XXXXXXXXXXXXX----  | CP1Sc3S4S5On7sem_Onthophagus_semiaureus_CS.idba.51              | XXXXXXXXXXXXX-XX    | CP1Sc3S4S5On7sem_Onthophagus_semiaureus_CS.idba.51_MERGED              |
| -XX-----X--X--X   | CP1Sc3S4S5On7sim    | XXXXXXXXXXXXX----  | CP1Sc3S4S5On7sim_Onthophagus_similis_CS.idba.37                 | XXXXXXXXXXXXX-XX    | CP1Sc3S4S5On7sim_Onthophagus_similis_CS.idba.37_MERGED                 |
| -XX-----X--X--X   | CP1Sc3S4S5On7vac    | -XXXXXXXXXXXXX---- | CP1Sc3S4S5On7vac_Onthophagus_vacca_CS.idba.55                   | -XXXXXXXXXXXXX----  | CP1Sc3S4S5On7vac_Onthophagus_vacca_CS.idba.55_MERGED                   |
| --X-----X----XX   | CP1Sc3S4S5On7vul    | -----XXXXXXXX----  | CP1Sc3S4S5On7vul_Onthophagus_vulpes_CS.idba.70                  | --X----XXXXXXXX---- | CP1Sc3S4S5On7vul_Onthophagus_vulpes_CS.idba.70_MERGED                  |
| --X-----X--XX     | CP1Sc3S4S5Ph7ard    | XXXXXXXXXXXXX----  | CP1Sc3S4S5Ph7ard_Phalops_ardea_CS.idba.8                        | XXXXXXXXXXXXX-XX    | CP1Sc3S4S5Ph7ard_Phalops_ardea_CS.idba.8_MERGED                        |
| --X-----X--XX     | CP1Sc3S4S5Pr7bic    | XXXXXXXXXXXXX----  | CP1Sc3S4S5Pr7bic_Proagoderus_bicallosus_CS.idba.3               | XXXXXXXXXXXXX-XX    | CP1Sc3S4S5Pr7bic_Proagoderus_bicallosus_CS.idba.3_MERGED               |
| --X-----X--XX     | CP1Sc3S4S5Pr7sch    | XXXXXXXXXXXXX----  | CP1Sc3S4S5Pr7sch_Proagoderus_schwanei_CS.idba.12                | XXXXXXXXXXXXX-XX    | CP1Sc3S4S5Pr7sch_Proagoderus_schwanei_CS.idba.12_MERGED                |
| --X-----X--XX     | CP1Sc3S4S5Ti7sar    | XXXXXXXXXXXXX----  | CP1Sc3S4S5Ti7sar_Tiniocellus_sarawacus_CS.idba.21               | XXXXXXXXXXXXX-XX    | CP1Sc3S4S5Ti7sar_Tiniocellus_sarawacus_CS.idba.21_MERGED               |
| --X-----X--XX     | CP1Sc3S4S5Tra7dim   | XXXXXXXXXXXXX----  | CP1Sc3S4S5Tra7dim_Tragiscus_dimidiatus_Scarab.idba.4            | XXXXXXXXXXXXX-XX    | CP1Sc3S4S5Tra7dim_Tragiscus_dimidiatus_Scarab.idba.4_MERGED            |
| -XX-----XX----    | CP1Sc3S4T5Gn7var    | XXXXXXXXXXXX-----  | CP1Sc3S4T5Gn7var_Gnorimus_variabilis_ameie.idba.13              | XXXXXXXXXXXX--XX-   | CP1Sc3S4T5Gn7var_Gnorimus_variabilis_ameie.idba.13_MERGED              |
| -XX-----X--XX     | CP1Sc13E4Eu7hae     | XXXXXXXXXXXXX----  | CP1Sc13E4Eu7hae_Eucinetus_haemorrhoidolus_842710_idba.contig_14 | XXXXXXXXXXXXX-XX    | CP1Sc13E4Eu7hae_Eucinetus_haemorrhoidolus_842710_idba.contig_14_MERGED |
| -XX-----X--XX     | CP1Sc13S4E17min     | XXXXXXXXXXXX-----  | CP1Sc13S4E17min_Elodes_minuta_ameie.idba.24                     | XXXXXXXXXXXX--X-    | CP1Sc13S4E17min_Elodes_minuta_ameie.idba.24_MERGED                     |
| -X-----XX----     | CP1Sc13S4Sc7orb     | XXXXXXXXXXXX-----  | CP1Sc13S4Sc7orb_Scirtes_orbicularis_ameie.idba.100              | XXXXXXXXXXXX-----   | CP1Sc13S4Sc7orb_Scirtes_orbicularis_ameie.idba.100_MERGED              |
| -XX-----XX----    | CP1T3An40m7f1o      | --XXXXXXXXXXXX---- | CP1T3An40m7f1o_Omonadus_floralis_HQ232825                       | --XXXXXXXXXXXX----  | CP1T3An40m7f1o_Omonadus_floralis_HQ232825_MERGED                       |
| -XX-----XX----    | CP1T3An4St7tob      | XXXXXXXXXXXX-----  | CP1T3An4St7tob_Stricticomus_tobias_ameie.idba.57                | XXXXXXXXXXXX-----   | CP1T3An4St7tob_Stricticomus_tobias_ameie.idba.57_MERGED                |
| -XX-----X--XX     | CP1T3B4Bo7sch       | XXXXX-----         | CP1T3B4Bo7sch_Boros_schneideri_ameie.idba.177                   | XXXXX-----X--XX     | CP1T3B4Bo7sch_Boros_schneideri_ameie.idba.177_MERGED                   |
| -X-----XX----     | CP1T3C4C5C17mic     | XXXXXXXXXXXX-----  | CP1T3C4C5C17mic_Cis_micans_ameie.idba.118                       | XXXXXXXXXXXX-----   | CP1T3C4C5C17mic_Cis_micans_ameie.idba.118_MERGED                       |
| -XX-----XX--XX    | CP1T3C4C50r7pyg     | --XXXXXX-----      | CP1T3C4C50r7pyg_Orthocis_pygmaeus_ameie.idba.147                | -XXXXXX--XX-XX      | CP1T3C4C50r7pyg_Orthocis_pygmaeus_ameie.idba.147_MERGED                |
| -X-----XX--XX     | CP1T3Me4Mik7gra     | --XXXXXXXXXXXX---- | CP1T3Me4Mik7gra_Mikadonius_gracilis_JX412823                    | -XXXXXXXXXXXX-XX    | CP1T3Me4Mik7gra_Mikadonius_gracilis_JX412823_MERGED                    |
| -X-----XX--XX     | CP1T3Me40s7bip      | --XXXXXXXXXXXX---- | CP1T3Me40s7bip_Osypa_bipunctata_JX313675                        | -XXXXXXXXXXXX----   | CP1T3Me40s7bip_Osypa_bipunctata_JX313675_MERGED                        |
| XXXXXXXXXXXXX---- | CP1T3Mo4Mo7atr      | XXXXXXXXXXXXX----  | CP1T3Mo4Mo7atr_Mordella atrata_NC_013254                        | XXXXXXXXXXXXX----   | CP1T3Mo4Mo7atr_Mordella atrata_NC_013254_MERGED                        |
| -X-----XX--XX     | CP1T3Mo4Morde7mil   | XXXXXXXXXXXX-----  | CP1T3Mo4Morde7mil_Mordellochroa_millieri_ameie.idba.36          | XXXXXXXXXXXX-----   | CP1T3Mo4Morde7mil_Mordellochroa_millieri_ameie.idba.36_MERGED          |
| -XX-----XX--XX    | CP1T3Mo4To7buc      | XXXXXXXXXXXX-----  | CP1T3Mo4To7buc_Tomoxia_bucephala_ameie.idba.63                  | XXXXXXXXXXXX--XX-   | CP1T3Mo4To7buc_Tomoxia_bucephala_ameie.idba.63_MERGED                  |
| -XX-----XX--XX    | CP1T3My4My7qua      | --XXXXXXXXXXXX---- | CP1T3My4My7qua_Mycetophagus_quadripustulatus_HQ232824           | -XXXXXXXXXXXX-XX    | CP1T3My4My7qua_Mycetophagus_quadripustulatus_HQ232824_MERGED           |
| -X-----XX--XX     | CP1T3O4I7s7cae      | XXXXXXXXXXXX-----  | CP1T3O4I7s7cae_Iscnomera_caerulea_JX412790                      | XXXXXXXXXXXX--XX-   | CP1T3O4I7s7cae_Iscnomera_caerulea_JX412790_MERGED                      |

|                      |                   |                    |                                                                        |                    |                                                                               |
|----------------------|-------------------|--------------------|------------------------------------------------------------------------|--------------------|-------------------------------------------------------------------------------|
| -XX-----             | CP1T304Is7cya     | XXXXXXXXXXXXX----  | CP1T304Is7cya_Ischnomera_cyanea_BIUK.idba.38                           | XXXXXXXXXXXXX----  | CP1T304Is7cya_Ischnomera_cyanea_BIUK.idba.38_MERGED                           |
| -XX-----XXX          | CP1T3040e7vir     | --XXXXXXXXX-----   | CP1T3040e7vir_Oedemera_virescens_HQ232826                              | -XXXXXXXXXX----XXX | CP1T3040e7vir_Oedemera_virescens_HQ232826_MERGED                              |
| -X-----              | CP1T3P4Sc7pec     | XXXXXXXXXXXXX----- | CP1T3P4Sc7pec_Schizotus_pectinicornis_amie.idba.83                     | XXXXXXXXXXXXX----- | CP1T3P4Sc7pec_Schizotus_pectinicornis_amie.idba.83_MERGED                     |
| --X-----XX--XXX      | CP1T3R4Pe7fen     | XXXXXXXXXXXXX----- | CP1T3R4Pe7fen_Pelecotoma_fennica_842676_idba_contig_23                 | XXXXXXXXXXXXX-XXX  | CP1T3R4Pe7fen_Pelecotoma_fennica_842676_idba_contig_23_MERGED                 |
| -X-----              | CP1T3Sa4Li7cur    | XXXXXXXXXXXXX----- | CP1T3Sa4Li7cur_Lissodema_cursor_amie.idba.80                           | XXXXXXXXXXXXX----- | CP1T3Sa4Li7cur_Lissodema_cursor_amie.idba.80_MERGED                           |
| --X-----XX--XXX      | CP1T3Sa4Rh7ruf    | XXXXXXXXXXXXX----- | CP1T3Sa4Rh7ruf_Rhinosimus_ruficollis_BIUK.idba.39                      | XXXXXXXXXXXXX-XXX  | CP1T3Sa4Rh7ruf_Rhinosimus_ruficollis_BIUK.idba.39_MERGED                      |
| -X-----              | CP1T3Sa4Sa7aen    | -----XXXXX-----    | CP1T3Sa4Sa7aen_Salpingus_aeneus_JX313680                               | -X-----XXXXX-----  | CP1T3Sa4Sa7aen_Salpingus_aeneus_JX313680_MERGED                               |
| -XX-----XXX          | CP1T3Sa4Vi7ruf    | XXXXXXXXXXXXX----- | CP1T3Sa4Vi7ruf_Vincenzellus_ruficollis_833403_Salpingidae_Vincenzellus | XXXXXXXXXXXXX-XXX  | CP1T3Sa4Vi7ruf_Vincenzellus_ruficollis_833403_Salpingidae_Vincenzellus_MERGED |
| -XX-----XX--XXX      | CP1T3Sc5An7mac    | XXXXXXXXXXXXX----- | CP1T3Sc5An7mac_Anasps_maculata_BIUK.idba.33                            | XXXXXXXXXXXXX-XXX  | CP1T3Sc5An7mac_Anasps_maculata_BIUK.idba.33_MERGED                            |
| -X-----              | CP1T3Sc5Cy7pha    | XXXXXXXXXXXXX----- | CP1T3Sc5Cy7pha_Cyrtanaspis_phalerata_amie.idba.38                      | XXXXXXXXXXXXX----- | CP1T3Sc5Cy7pha_Cyrtanaspis_phalerata_amie.idba.38_MERGED                      |
| -X-----              | CP1T3T4D5Sc7met   | XXXXXXXXXXXXX----- | CP1T3T4D5Sc7met_Scaphidema_metallicum_amie.idba.104                    | XXXXXXXXXXXXX----- | CP1T3T4D5Sc7met_Scaphidema_metallicum_amie.idba.104_MERGED                    |
| XXXX-XXX-X-XXX----   | CP1T3T4D5U17der   | XXXXXXXXXXXXX----- | CP1T3T4D5U17der_Ulomoides_dermestoides_NC_025332                       | XXXXXXXXXXXXX----  | CP1T3T4D5U17der_Ulomoides_dermestoides_NC_025332_MERGED                       |
| -XX-----             | CP1T3T4T5Na7lae   | XXXXXXXXXXXXX----- | CP1T3T4T5Na7lae_Nalassus_laevioctostriatus_2VGB.idba.14                | XXXXXXXXXXXXX----  | CP1T3T4T5Na7lae_Nalassus_laevioctostriatus_2VGB.idba.14_MERGED                |
| -----X--X-X--        | CP1T3T4T5Sca7unc  | XXXXXXX-XXXXX----  | CP1T3T4T5Sca7unc_Scaurus_uncinus_Soil.idba.92                          | XXXXXXX-XXXXX-X-   | CP1T3T4T5Sca7unc_Scaurus_uncinus_Soil.idba.92_MERGED                          |
| XXXXXXXX-X-XXX-XXX   | CP1T3T4T5Te7mol   | XXXXXXXXXXXXX----- | CP1T3T4T5Te7mol_Tenebrio_molitor_NC_024633                             | XXXXXXXXXXXXX-XXX  | CP1T3T4T5Te7mol_Tenebrio_molitor_NC_024633_MERGED                             |
| XXXXXXXXXXXX-XXX---- | CP1T3T4Tr7aud     | XXXXXXXXXXXXX----- | CP1T3T4Tr7aud_Tribolium_audax_NC_024600                                | XXXXXXXXXXXXX----  | CP1T3T4Tr7aud_Tribolium_audax_NC_024600_MERGED                                |
| -XX-----XX--XXX      | CP1T3Te4T5Te7fun  | XXXXXXXXXXXXX----- | CP1T3Te4T5Te7fun_Tetratoma_fungorum_amie.idba.12                       | XXXXXXXXXXXXX-XXX  | CP1T3Te4T5Te7fun_Tetratoma_fungorum_amie.idba.12_MERGED                       |
| --X-----XX--XXX      | CP1T3Z4Z5U6Us7lac | XXXXXXXXXXXXX----- | CP1T3Z4Z5U6Us7lac_Usechus_lacerta_679350_idba_contig_8                 | XXXXXXXXXXXXX-XXX  | CP1T3Z4Z5U6Us7lac_Usechus_lacerta_679350_idba_contig_8_MERGED                 |

## Manual correction of erroneous sequences

This list summarizes the manual corrections done for the tree of Figure 3 (and the complete tree below). These correspond to NCBI terminals whose taxonomic identification (their NCBI taxonomic id) appears erroneous in light of their phylogenetic placement.

### \*\*\*NCBI terminals with probable erroneous taxonomic identifications\*\*\*

- CP1Cur3C4M5M6Li7cor
- CP1Cu3Lat4Ak7sle
- CP1S3S4Ps5Ba7del
- CP1Hi3H4S5Gn7com
- CP1Cu3N4Am7C27
- CP1Bo3D4Tro7MC2010
- CP1Cur3C4Ma5Ma7cer
- CP1Ch3Ce4D5Cy7asa
- CP1Cur3C4M5Ph6Cr7pun
- CP1S3Si4S5De7qua
- CP1Cu3N4Cy5Cy7MJM2013

### \*\*\* Minor errors detected in Genbank \*\*\*\*

- CP1S3S4Ox5Ox7\_Oxytelus\_sp\_JX412796 (should use *Anotylus rugatilis*)
- CP1S3S4O5Ne7TJH2005 is same species as  
CP1S3S4O5Ne7bru\_Neophonus\_bruchi\_Staph.idba.0\_MERGED

## NCBI extraction and Blast threshold

The following table reports the number of mitochondrial loci extracted from the NCBI at different blast E-value thresholds. A value of 1E-5 was retained and is the baseline used for the differences reported below:

| Locus           | #sequence at 1E-5 | Variation at different Blast thresholds |       |                  |       |       |       |
|-----------------|-------------------|-----------------------------------------|-------|------------------|-------|-------|-------|
|                 |                   | 1E-12                                   | 1E-09 | 1E-05 (baseline) | 1E-03 | 1E+00 | 1E+01 |
| <i>12S</i>      | 4105              | -5                                      | -1    | 0                | 0     | +5    | +19   |
| <i>16Sa</i>     | 14723             | -4                                      | 0     | 0                | 0     | +33   | +49   |
| <i>16Sb</i>     | 13487             | -13                                     | 0     | 0                | 0     | +54   | +96   |
| <i>ATP6</i>     | 292               | -1                                      | 0     | 0                | 0     | +7    | +51   |
| <i>cox3</i>     | 448               | 0                                       | 0     | 0                | 0     | 0     | +4    |
| <i>cox2</i>     | 7363              | -1                                      | 0     | 0                | 0     | +44   | +148  |
| <i>cox1seg1</i> | 46546             | -8                                      | 0     | 0                | 0     | +7    | +11   |
| <i>cox1seg2</i> | 46009             | -1                                      | 0     | 0                | 0     | +1    | +64   |
| <i>cytb</i>     | 5370              | -6                                      | 0     | 0                | 0     | +0    | +1    |
| <i>ef1a</i>     | 3153              | -9                                      | -3    | 0                | +3    | +3    | +3    |
| <i>nad1</i>     | 360               | 0                                       | 0     | 0                | 0     | +6    | +63   |
| <i>nad2</i>     | 612               | -2                                      | -2    | 0                | 0     | +28   | +87   |
| <i>nad3</i>     | 287               | -1                                      | 0     | 0                | 0     | +6    | +30   |
| <i>nad4</i>     | 290               | 0                                       | 0     | 0                | 0     | +15   | +35   |
| <i>nad5</i>     | 1800              | 0                                       | 0     | 0                | 0     | +9    | +105  |
| <i>nad6</i>     | 191               | -29                                     | -19   | 0                | +14   | +30   | +76   |

We ran the blast extraction at different Blast E-value thresholds and observed the variation in the number of sequences extracted. When changing the blast E-value threshold between 1e-12 and 1e-3, there is almost no change in the number of extracted sequences. This indicates that the criteria used in the pipeline are efficient in extracting all loci from the Genbank coleopteran data (E-value<1e-5, word size =12, align\_length>=60% of the expected locus length). The only notable exception is the locus *nad6*, for which the number of extracted sequences is more dependant to the used threshold. After observing in detail, the new sequences extracted at higher E-value thresholds, we observed that the corresponding Blast alignments were very short (dozens of bases) and were mainly disturbed by the second half of this gene, which contains a large portion of AT-rich segments. AT-rich segments are typically producing lower E-values, because they are abundant in reference databases and the probability to have detected homology by chance and not because of a real signal (the meaning of the E-value), is higher. This mean that in the future, the E-value value threshold should be raised for this Locus, or that better bait sequences should be used. Finally, for several loci, dozens of new sequences are extracted when very weak (and generally not recommended) thresholds of 0.1 or 1 are chosen. This is particularly true for *cox2* and some *nad* genes. These numbers should however be taken with caution. In fact, several of the new sequences are erroneous hits due to the sequence patterns shared by the different mitochondrial genes (similar regions between the different *nad* gene).

## Likelihood of the 20 tree searches based on the NCBI+MMG min3loci 1RY\_3Del matrix

We launched 20 searches based on the NCBI+MMG min3loci 1RY\_3Del matrix, the best tree (see below, seed = 12000) was used as starting tree for the search based on the NCBI+MMG min2loci 1RY\_3Del matrix (topology unconstrained). RAxML command:

```
raxmlHPC-PTHREADS -T 12 -n result_min3loci_smv5.1_seed12000 -s infile.txt -q partitions.txt -p 12000 -k -c 25 -m GTRCAT
```

| RAxML seed (-p) | Gamma-based Likelihood | GAMMA-based Score of best tree | time (hours) | diff to best.    |
|-----------------|------------------------|--------------------------------|--------------|------------------|
| 1000            | -11450706.323166       | -11450306.278547               | 118.416336   | -436.6692709997  |
| 2000            | -11451121.951837       | -11450571.131743               | 99.527583    | -701.5224670004  |
| 3000            | -11450905.917378       | -11450424.776289               | 117.397756   | -555.1670129988  |
| 4000            | -11450695.323051       | -11450132.612988               | 113.556559   | -263.0037120003  |
| 5000            | -11450574.745977       | -11450226.311419               | 131.865519   | -356.7021430004  |
| 6000            | -11451095.862001       | -11450515.188733               | 150.632361   | -645.5794569999  |
| 7000            | -11450840.566406       | -11450141.221002               | 112.649898   | -271.611725999   |
| 8000            | -11451099.812055       | -11450562.367976               | 103.53299    | -692.7587000001  |
| 9000            | -11451038.838944       | -11450574.763927               | 107.389821   | -705.1546509992  |
| 10000           | -11450999.71374        | -11450638.532262               | 119.203391   | -768.9229859989  |
| 11000           | -11450803.022373       | -11450319.245878               | 100.511854   | -449.6366019994  |
| 12000           | -11450428.470626       | -11449869.609276               | 124.213404   | <b>(best)</b>    |
| 13000           | -11450558.60822        | -11450214.256986               | 106.185383   | -344.6477099992  |
| 14000           | -11450694.326608       | -11450315.357446               | 114.860602   | -445.7481699996  |
| 15000           | -11450675.505885       | -11450182.739883               | 153.660767   | -313.1306069996  |
| 16000           | -11450922.880813       | -11450268.350853               | 110.463154   | -398.7415769994  |
| 17000           | -11450701.234511       | -11450250.937053               | 111.724028   | -381.3277770001  |
| 18000           | -11450850.682595       | -11450266.0749                 | 101.416929   | -396.465623999   |
| 19000           | -11451405.119621       | -11450915.764047               | 120.598017   | -1046.1547710002 |
| 20000           | -11451133.805351       | -11450629.176252               | 121.664275   | -759.5669759996  |

# Annotation of NCBI+MMG min2loci 1RY\_3Del tree

Total number in this tree based on a minimum of two loci is 15983.

Use Suppl. File S2 to access taxonomic code details.

## 1. Suborder monophyly and basal relationships.

Molecular studies have generally recovered the four suborders as monophyletic, but their relationships are not supported. Recent consensus is (Outgroup (*Polyphaga* (*Archostemata* (*Myxophaga* + *Adephaga*)))) based on transcriptomes (Misof et al., 2014), PhyloBayes analysis of mitogenomes (Timmermans et al., 2016), and multiple nuclear markers (Mckenna et al., 2015). An observed relationship in minimum-2 tree is (Outgroup (*Myxophaga* (*Archostemata* (*Adephaga* + *Polyphaga*))))). Other trees from min3loci and NCBI-only data show (Outgroup (*Myxophaga* (*Archostemata* (*Polyphaga*+*Adephaga*))))).

## 2. *Archostemata* (9 terminals, codes starting with CAr1).

All monophyletic except for two 18S sequences of *Myxophaga* sister to *Archostemata*. Three families are represented: (*Micromalthidae*, (*Cupedidae* + *Ommatidae*)). Two contigs from a Bornean metagenome probably correspond to a single specimen.

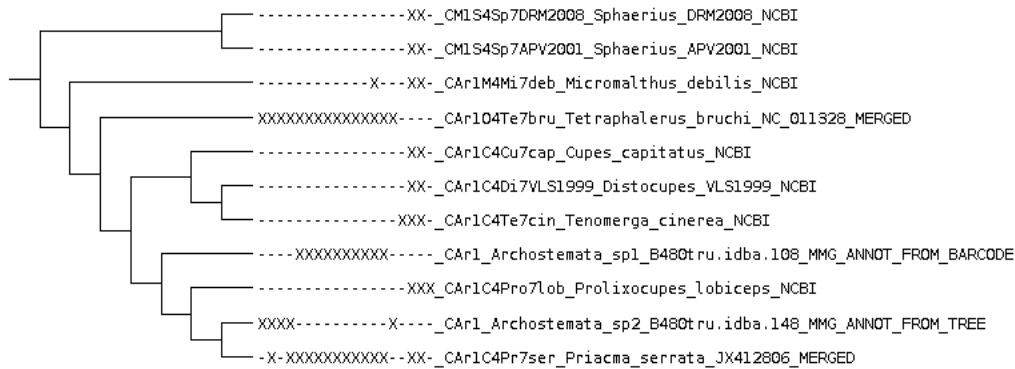

## 3. *Myxophaga* (25 terminals, codes starting with CM1).

The suborders are monophyletic except for two *cox1*+18S sequences of *Sphaeriusidae* that are sister to *Archostemata*. Four families are represented, with relationships (*Torridincolidae* (*Lepiceridae*, *Sphaeriusidae*) *Hydroscaphidae*)).

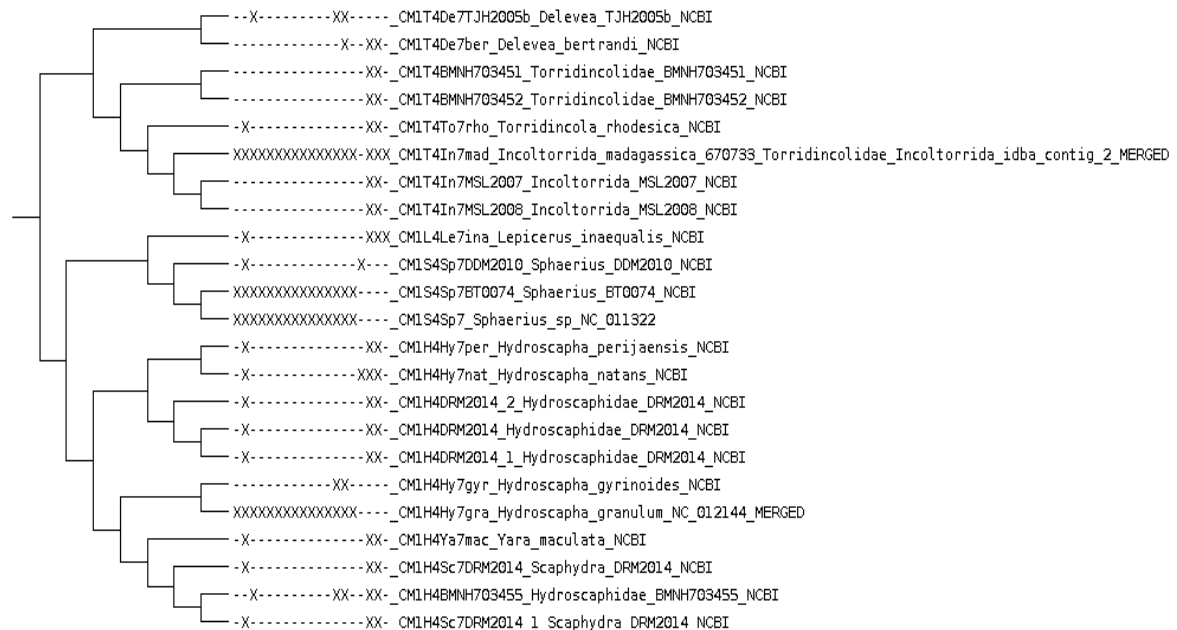

4. **Adephaga (3403 terminals, codes starting with CA1).**

Basal relationships have been separated into reciprocally monophyletic aquatic *Hydradephaga* and terrestrial *Geadephaga* (Maddison et al., 2009; Shull et al., 2001) which is confirmed by recent full mitogenome studies (Lopez et al., submitted). Here we find a paraphyletic *Hydradephaga*, with a comb-like arrangement of ((*Noteridae* + *Meruidae*) (*Haliplidae* + *Dytiscoidea*)) ((*Gyrinidae* (*Cicindelidae* + *Carabidae/Trachypachidae*))). The topology with basal split of (*Noteridae* + *Meruidae*) from all others matches Timmermans et al. 2016. *Hydradephaga* are paraphyletic also in Bocak et al., 2014, but with *Gyrinidae* at the basal split. Mckenna et al., 2015 constrained the monophyly of *Geadephaga* and *Hydradephaga*.

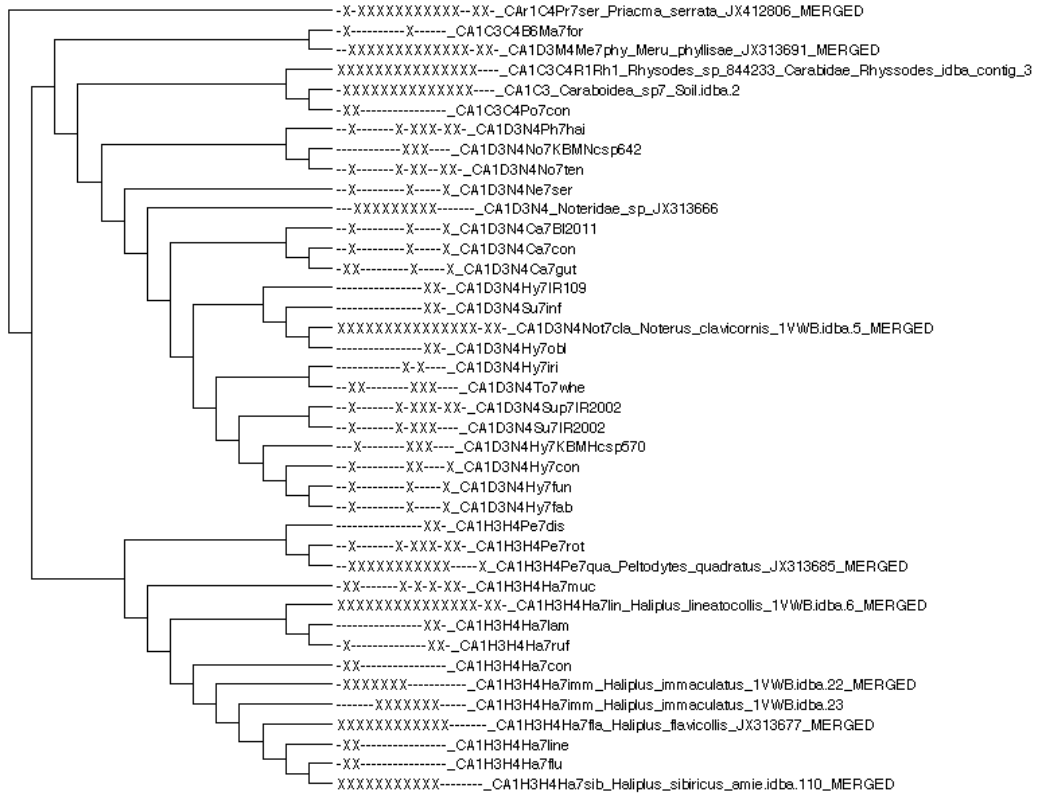



5. **Dytiscoidea (1518 terminals, codes starting with CA1D3).** The superfamily contains six families.
- a. **Basal relationships of Dytiscoidea.** The tree shows ((*Aspydytidae* + *Amphizoidae*) (*Hygrobiiidae* (*Dytiscidae*))), which is in agreement with Balke et al., 2008. *Noteridae* + *Meruidae* are placed distantly at the base of *Adephaga* tree (see above). All families are monophyletic, except for a few representatives of *Laccophilinae* are included with *Hygrobiiidae*.
  - b. **Dytiscidae (1488 terminals, codes starting with CA1D3D4).** The most complete molecular tree available is Ribera, 2008, which found several subfamilies non-monophyletic. The current tree is more in agreement with the subfamily classification than the summary tree of which are recovered as monophyletic here.
    - i. *Dytiscinae* is monophyletic, except for the distantly related *Cybistrini*. Ribera, 2008 recovered tribes *Acilini* and *Hydaticini* / *Hyderodini* in a clade different from *Dytiscini*, which is not observed here.
    - ii. *Agabinae* is monophyletic: *Hydrotrupes* is sister to *Platynectes* and relatives. All together they are sister to *Agabini*; these groups were not a monophylum in Ribera, 2008. The two large genera *Ilybius* / *Ilybiosoma* and *Agabus* are reciprocally monophyletic except for species of *Platambus* which are scattered throughout the *Agabini*.
    - iii. *Laccophilinae* is monophyletic and includes *Agabetini*, which was recovered distant to *Laccophilini* in Ribera, 2008.
    - iv. *Copelatinae*: *Agaporomorphus* is deeply embedded in this subfamily, near *Madaglymbus* (not recovered as closely related to other *Copelatinae* in Ribera, 2008). *Liopterus* is sister to the large *Aglymbus* / *Copelatus* clade, which is reciprocally monophyletic to the *Exocelina* / *Papuadytes* clade (Balke et al., 2004).
    - v. Relationships within *Dytiscidae* show four main lineages:
      1. Basal split is *Aubehydrini* (*Dytiscinae*) as sister to all others. In Ribera, 2008 *Aubehydrini* is recovered near the base together with *Hydrodytinae* / *Matinae* (here found nearer *Hydroporinae*, clade 4.)
      2. ((*Coptotominae* + *Lancetinae*) *Agabinae*)
      3. ((*Colymbetinae* + *Dytiscinae*) *Copelatinae*) (NB: *Copelatinae* are not fully monophyletic because of four species represented by 18S only are placed distantly).
      4. ((*Matinae* (*Laccophilinae* + *Cybistrini*)) ((*Hydrodytinae*) *Hydroporinae*)).

**Important note:** The following tree figure is a compressed versions of the 1488 *Dytiscidae* terminals. Details are part of the complete tree included in Suppl File S4 and S5 (which spans over many pages). The corresponding subtree can be reached by searching (CTRL+F) for the Label prefix "CA1D3D4".

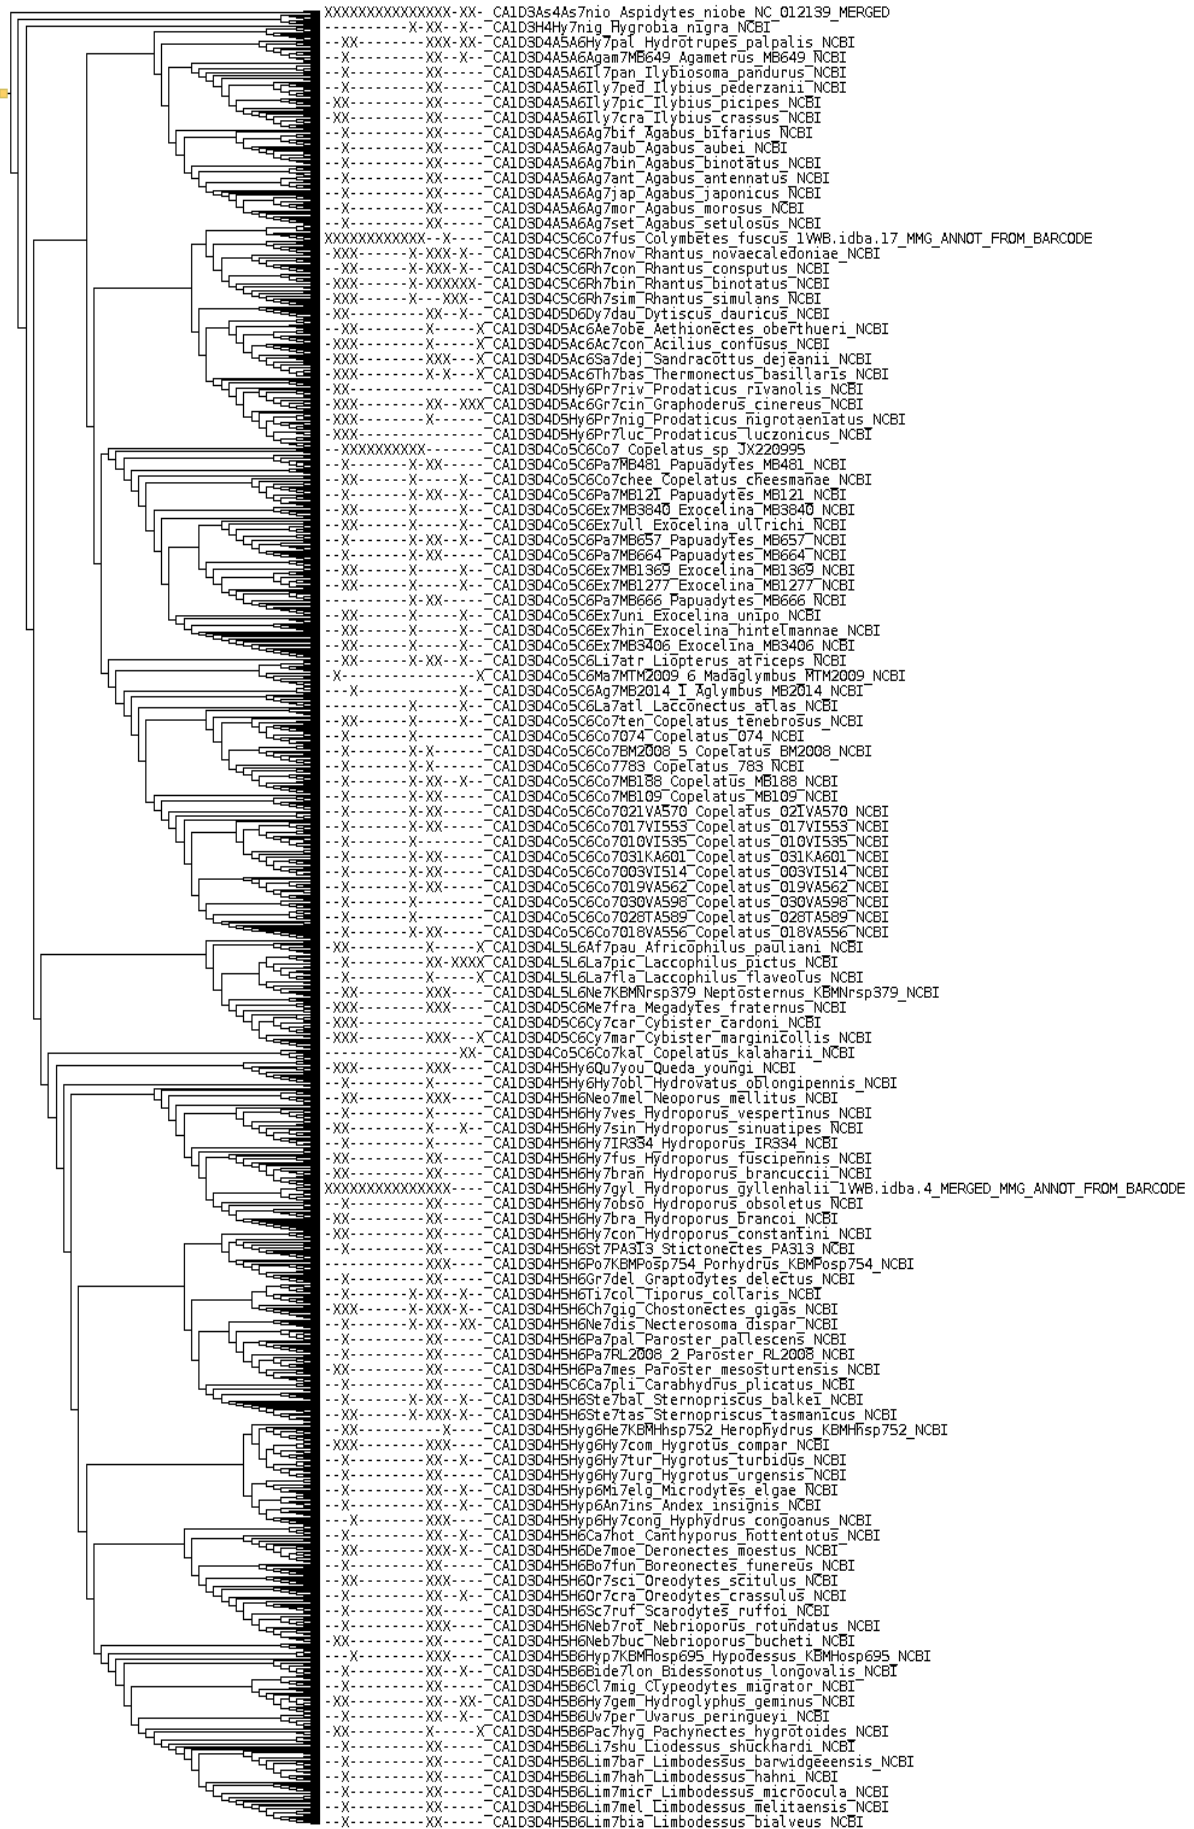

6. **Gyrinoidea (Gyrinidae) (93 terminals, codes starting with CA1G3).**

A recent study of Miller and Bergsten, 2012 produced a tree very similar to that found here. The basal split is *Spanglerogyrus* versus all others, as expected; two main clades include ((*Macrogyrus* + *Dineutus*) *Gyrinus*) and (*Heterochilus* (*Orectochilus* ((*Patrus* + *Gyretes*) *Orectogyrus*))). Miller and Bergsten recover (*Macrogyrus* + *Dineutus*) as sister to the latter clade, but with low support.

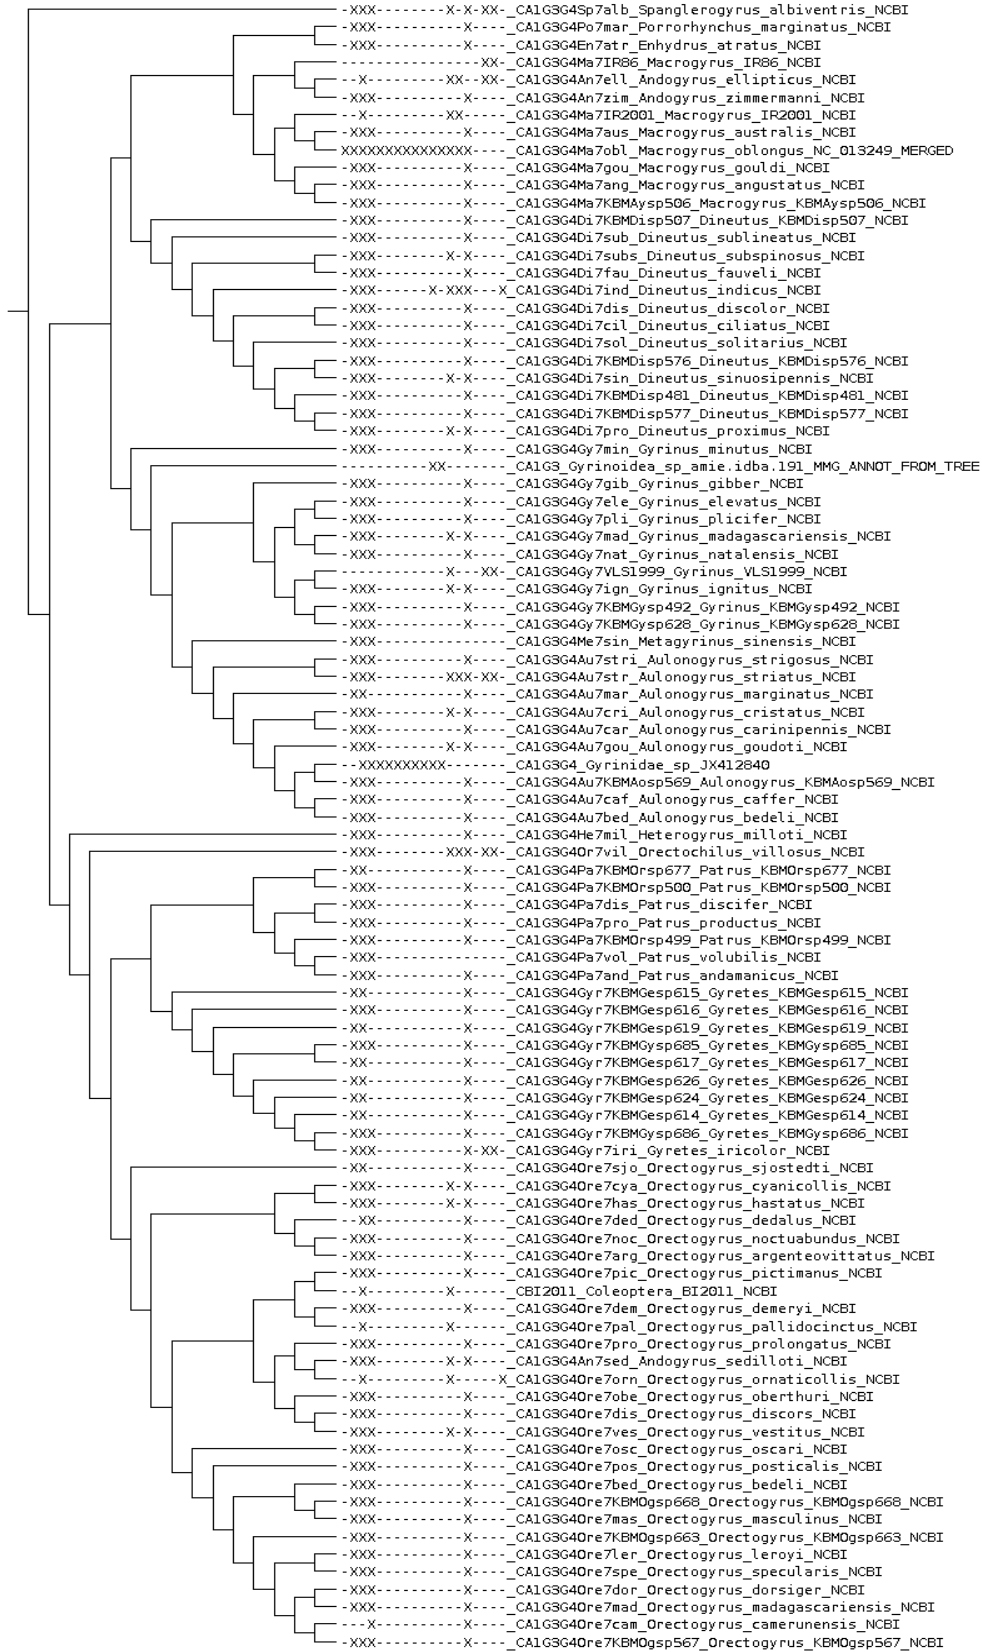

7. **Carabaeoidea (=Geadephaga) (1774 terminals, codes starting with CA1C3).**

A major attempt for resolving basal relationships was by Maddison et al., 1999 using 18S, and basal relationships in the large subfamily Harpalinae (Ober, 2002) based on 28S and wingless. The NCBI taxonomy recognises four families, *Carabidae*, *Cicindelidae*, *Trachypachidae* and *Rhysodidae*. We find *Cicindelidae* and *Carabidae* + *Trachypachidae* split into two sister lineages (The single representative of *Rhysodidae* groups with *Cicindelidae*).

a. ***Cicindelidae* (442 terminals, codes starting with CA1C3C4C5).**

Basal relationships have been assessed by Vogler and Pearson, 1996 using 16S and 18S rRNA. Treated as subfamily of *Carabidae* in the GenBank taxonomy but is sister to all other caraboids in the current tree (except for three members of tribe *Rhysodini* represented by 18S sequences and thus deserves family status (also see López-López and Vogler, 2017). *Cicindelidae* is monophyletic, with three main groups recognised in NCBI.

- i. *Megacephalini*: split into two clades, including a diverse set of species of several species poor Southern Hemisphere genera (subtribe *Omina*), and the cosmopolitan genus *Megacephala* s.l. (subtribe *Megacephalina*). The latter is sister to *Collyridini*, a group of mainly arboreal species. Some inconsistencies in tree due to double entry for misspelling of *Platychile* and *Platychila*.
- ii. *Cicindelini*: recovered as monophyletic, includes several genera frequently assigned to subtribe *Prothymina*. Basal split is genus *Pseudoxycheila*, and comb-like arrangement of other genera, in agreement with Vogler and Pearson 1996.
  1. *Cicindelina*: this group is recovered as the terminal portion of *Cicindelidae*, and recovers broadly the subclades of North American groups (Vogler et al., 2005) and worldwide clades based on a smaller subsample, including clades I, II, and III of (Pons et al., 2004), and Asian lineages (Sota et al., 2011). Genus and subgenus assignments in *Cicindelina* have been applied inconsistently, which complicates the use of measures of monophyly.

**Important note:** The following tree is a compressed version of the 442 *Cicindelidae* terminals. Details are part of the complete tree included in Suppl File S4 and S5 (which spans over many pages). The corresponding tree can be reached by searching (CTRL+F) for the Label prefix “CA1C3C4C5”.

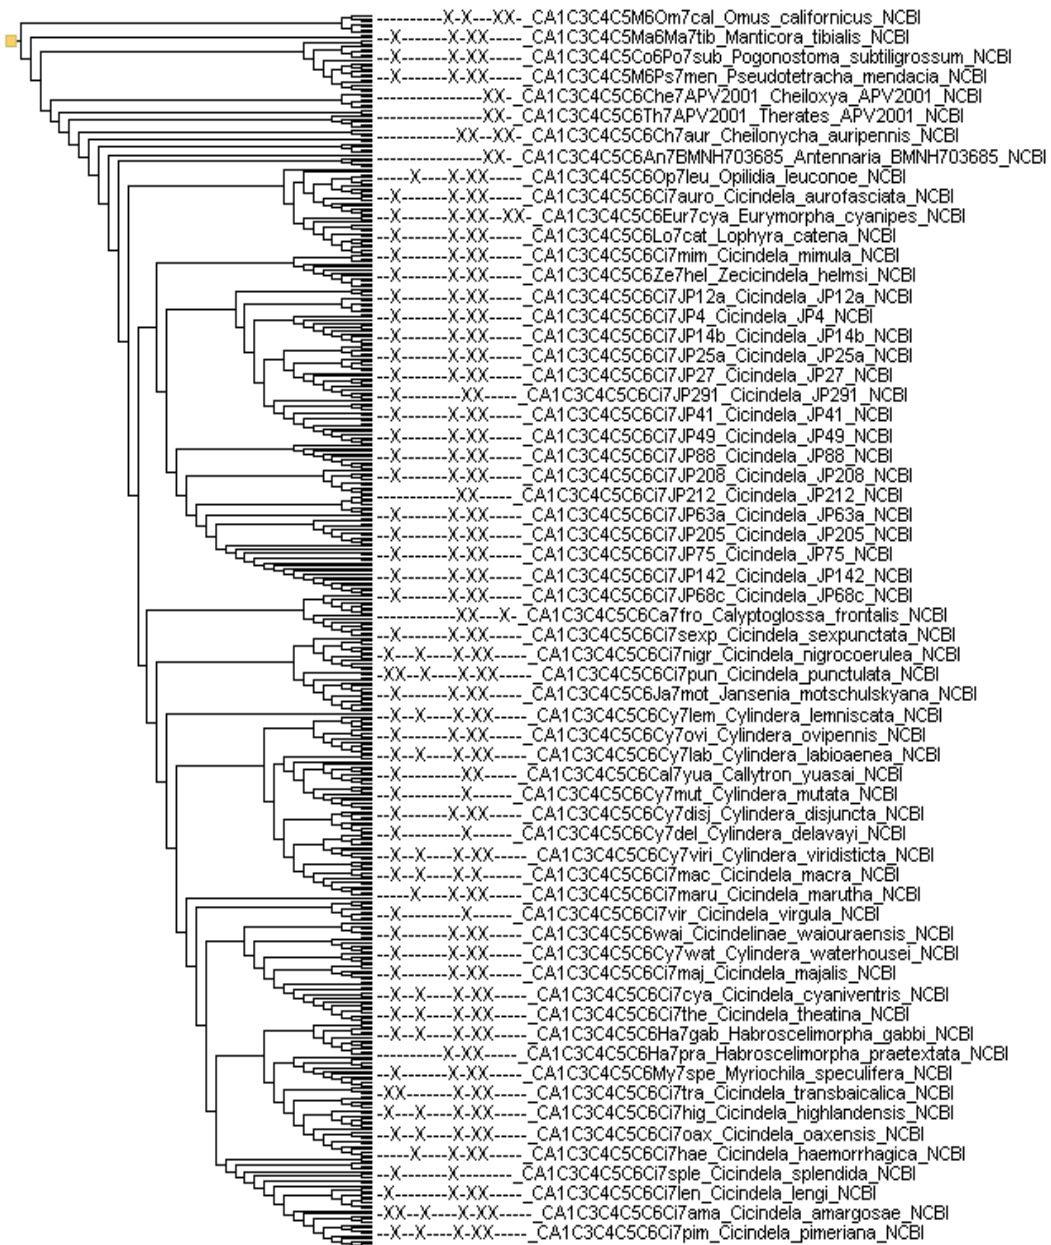

b. **Carabidae (1332 terminals, codes starting with CA1C3C4).**

Data are contributed by Maddison et al., 1999 study using 18S, and basal relationships in the large subfamily *Harpalinae* (Ober and Heider, 2010) based on 28S and wingless. This is complemented by several studies on large genera, e.g. on *Carabus* (Deuve et al., 2012), *Bembidion* (Maddison, 2012), *Trechitae* and various genera of *Harpalinae*.

- i. **Carabidae.** They are a monophyletic (with the inclusion of *Trachypachidae*) and are sister to all other *Carabidae*. This branch includes several clades in a comb-shaped arrangement, including *Trachypachidae* + *Nebriini*, *Elaphrini*, the southern-hemisphere *Pamborus* + *Ceroglossus*, *Cychnus*, and *Calosoma* as sister to *Carabus*. These five major genus-level lineages are monophyletic except for two genera of *Trachypachidae*, *Trachypachis* (represented by full mitogenome) and *Systolosoma* (represented by 18S only) are widely separated.
  1. *Carabus*: the species groups of (Deuve et al., 2012) are mostly recovered but with slightly different relationships to each other. For example, *Neocarabi* are part of a wider clade including *Ohomopterus* and *Archicarabus*. This clade is embedded in a set of species groups of *Multistriati*, which are rendered paraphyletic with regard to the extended *Neocarabi*. Note that *Ohomopterus* from a different dataset (Sota et al., 2001) is embedded in *Multistriati* sister to *C. granulatus / hortensis*. The sister group of the large *Multistriati* + *Neocarabi* clade is (*Ctenocarabus* + *Tachypus*). Basal splits in *Carabus* largely correspond to the structure in Deuve et al. 2012.
  2. Remaining *Carabidae*: *Broscini* sister to all others, followed by several small groups including (*Promecognathinae*, (*Omophroninae* + *Psydrini*)), *Migadopini* and *Loricerini*. Most of these groups have been sequenced for 18S only. The terminal split includes two very large clades, separating *Trechitae* and *Harpalinae*, each clade includes several smaller group of uncertain placement. *Harpalinae* is a terminal group that is embedded in various major lineages, including *Scaritini*, *Clavini*, *Psydrini*, *Brachinini* and others.
- ii. **Trechitae (469 terminals).** Consisting of two major groups, with >200 available species of *Bembidion* internal relationships and relationships with smaller genera were arranged very similarly to the study of Maddison and Ober, 2011. *Patrobini* are part of *Trechitae* (sister to *Trechus*), as found by Maddison and Ober, 2011.
- iii. **Harpalinae.** The NCBI taxonomy splits this group into multiple subfamilies, including *Harpalinae*, *Licininae* and *Platyninae*. Basal relationships in this very large group have been treated by Ober and Heider, 2010 based on 28S and wingless, thus only one locus of those used here. Taxa present are derived from several large genus level studies (each ~100 species), for *Blackburnia*, *Pterostichus*, and *Calathus*. *Harpalinae* are monophyletic. The resolution in this part of the tree shows various incongruences with the tribal taxonomy. Basal splits are *Zuphiini* splitting before the *Lebiini / Cyclosomini*, which are sister to two large terminal clades corresponding mainly to (*Zabrini* + *Pterostichini*) and (*Harpalini* + *Platinini*). The sister relationships of *Harpalinae* are not clear.

**Important note:** The following tree is a compressed version of the 1332 Carabidae terminals. Details are part of the complete tree included in Suppl File S4 and S5 (which spans over many pages). The corresponding tree can be reached by searching (CTRL+F) for the Label prefix "CA1C3C4".

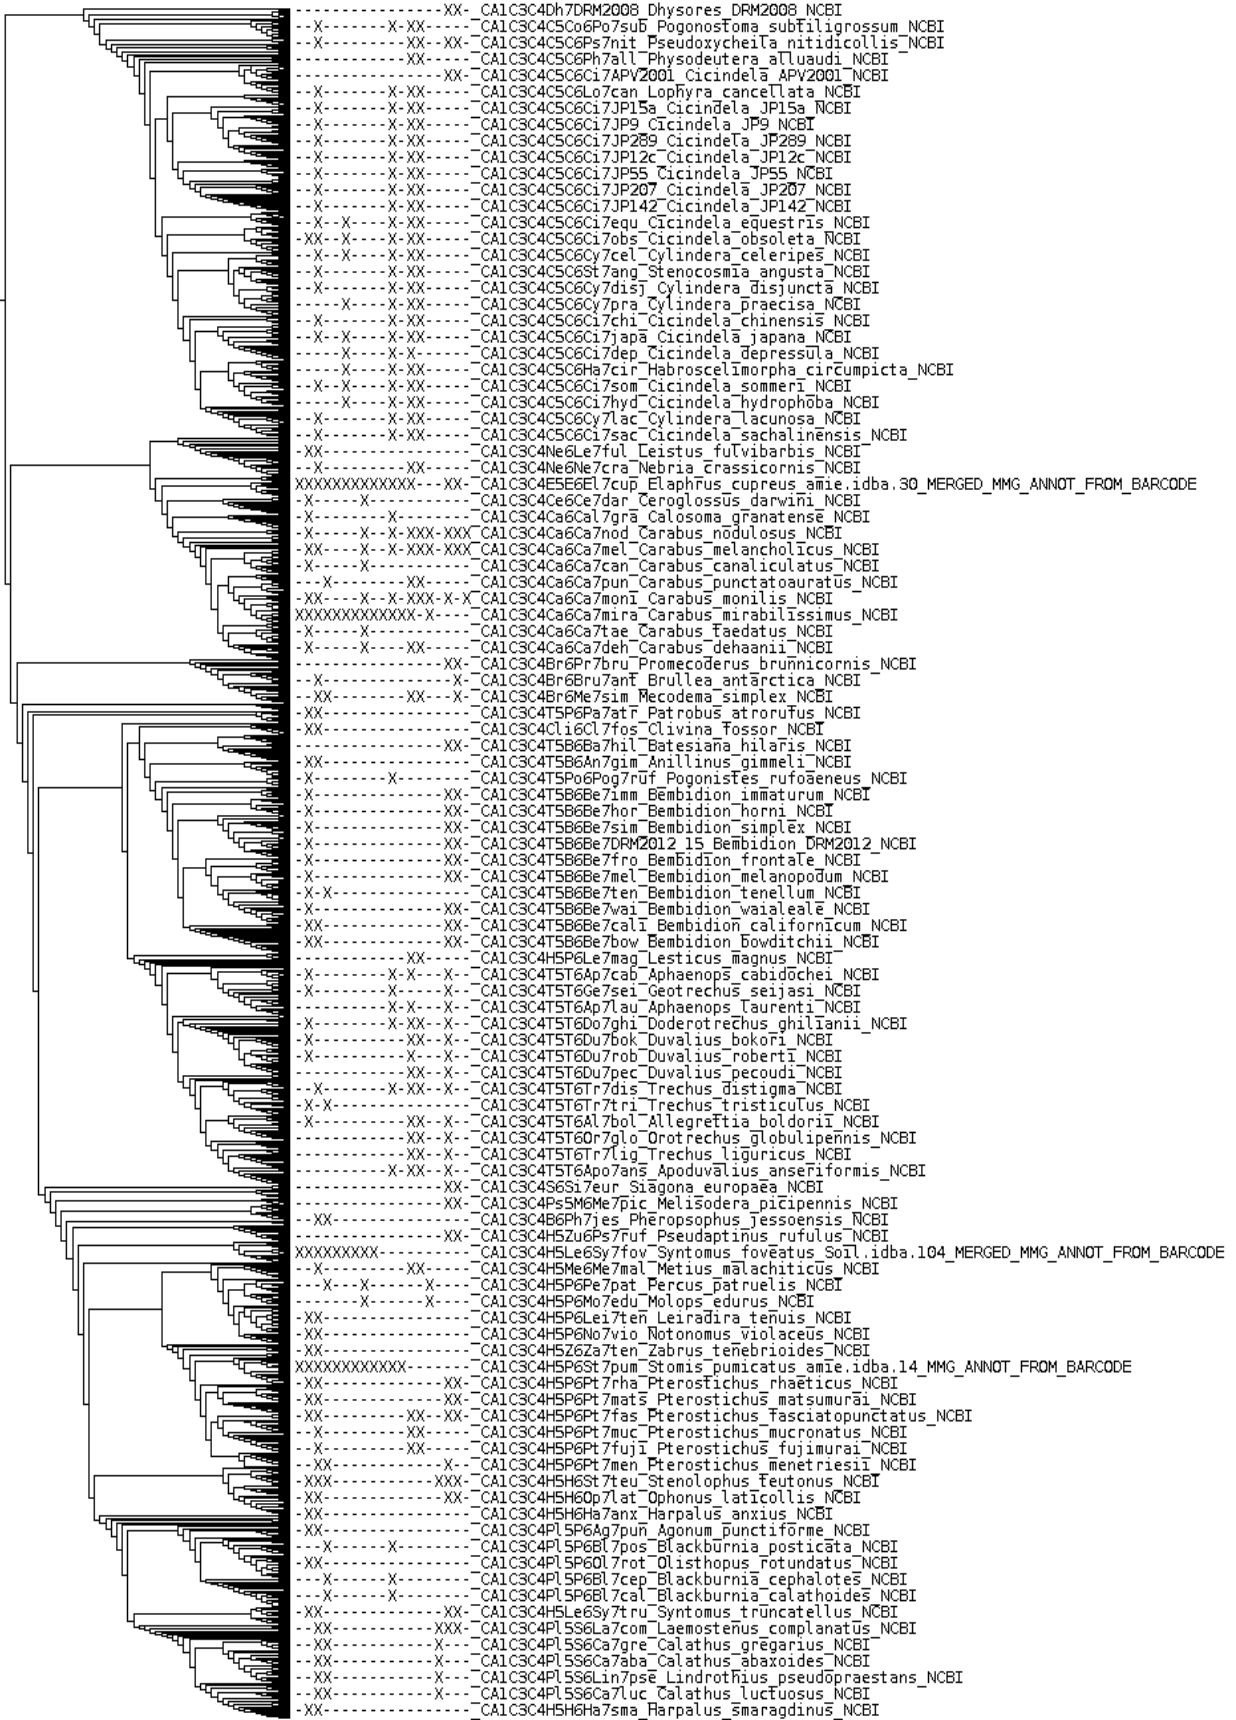

## References

- Balke, M., Ribera, I., Beutel, R., Vilorio, A., Garcia, M., Vogler, A.P., 2008. Systematic placement of the recently discovered beetle family Meruidae (Coleoptera: Dytiscoidea) based on molecular data. *Zool. Scr.* 37, 647–650.
- Balke, M., Ribera, I., Vogler, A.P., 2004. MtDNA phylogeny and biogeography of Copelatinae, a highly diverse group of tropical diving beetles (Dytiscidae). *Mol. Phylogenet. Evol.* 32, 866–880.
- Bocak, L., Barton, C., Crampton-Platt, A., Chesters, D., Ahrens, D., Vogler, A.P., 2014. Building the Coleoptera tree-of-life for >8000 species: composition of public DNA data and fit with Linnaean classification. *Syst. Entomol.* 39, 97–110.
- Deuve, T., Cruaud, A., Genson, G., Rasplus, J.-Y., 2012. Molecular systematics and evolutionary history of the genus *Carabus* (Col. Carabidae). *Mol. Phylogenet. Evol.* 65, 259–275.
- López-López, A., Vogler, A.P., 2017. The mitogenome phylogeny of Adephega (Coleoptera). *Molecular Phylogenetics and Evolution* 114: 166–174.
- Maddison, D.R., 2012. Phylogeny of Bembidion and related ground beetles (Coleoptera: Carabidae: Trechinae: Bembidiini: Bembidiina). *Mol. Phylogenet. Evol.* 63, 533–576.
- Maddison, D.R., Baker, M.D., Ober, K.A., 1999. Phylogeny of carabid beetles as inferred from 18S ribosomal DNA (Coleoptera: Carabidae). *Syst. Entomol.* 24, 103–138.
- Maddison, D.R., Moore, W., Baker, M.D., Ellis, T.M., Ober, K.A., Cannone, J.J., Gutell, R.R., 2009. Monophyly of terrestrial adephegan beetles as indicated by three nuclear genes (Coleoptera: Carabidae and Trachypachidae). *Zool. Scr.* 38, 43–62.
- Maddison, D.R., Ober, K.A., 2011. Phylogeny of minute carabid beetles and their relatives based upon DNA sequence data (Coleoptera, Carabidae, Trechitae). *Zookeys* 229–260.
- McKenna, D.D., Wild, A.L., Kanda, K., Bellamy, C.L., Beutel, R.G., Caterino, M.S., Farnum, C.W., Hawks, D.C., Ivie, M.A., Jameson, M.L., Leschen, R.A.B., Marvaldi, A.E., Mchugh, J.V., Newton, A.F., Robertson, J.A., Thayer, M.K., Whiting, M.F., Lawrence, J.F., ŚLIPINSKI, A., Maddison, D.R., Farrell, B.D., 2015. The beetle tree of life reveals that Coleoptera survived end-Permian mass extinction to diversify during the Cretaceous terrestrial revolution. *Syst. Entomol.* 40, 835–880.
- Miller, K.B., Bergsten, J., 2012. Phylogeny and classification of whirligig beetles (Coleoptera: Gyrinidae): relaxed-clock model outperforms parsimony and time-free Bayesian analyses. *Syst. Entomol.* 37, 706–746.
- Misof, B., Liu, S., Meusemann, K., Peters, R.S., Donath, A., Mayer, C., Frandsen, P.B., Ware, J., Flouri, T., Beutel, R.G., Niehuis, O., Petersen, M., Izquierdo-Carrasco, F., Wappler, T., Rust, J., Aberer, A.J., Aspöck, U., Aspöck, H., Bartel, D., Blanke, A., Berger, S., Böhm, A., Buckley, T.R., Calcott, B., Chen, J., Friedrich, F., Fukui, M., Fujita, M., Greve, C., Grobe, P., Gu, S., Huang, Y., Jermini, L.S., Kawahara, A.Y., Krogmann, L., Kubiak, M., Lanfear, R., Letsch, H., Li, Y., Li, Z., Li, J., Lu, H., Machida, R., Mashimo, Y., Kapli, P., McKenna, D.D., Meng, G., Nakagaki, Y., Navarrete-Heredia, J.L., Ott, M., Ou, Y., Pass, G., Podsiadlowski, L., Pohl, H., von Reumont, B.M., Schütte, K., Sekiya, K., Shimizu, S., Slipinski, A., Stamatakis, A., Song, W., Su, X., Szucsich, N.U., Tan, M., Tan, X., Tang, M., Tang, J., Timelthaler, G., Tomizuka, S., Trautwein, M., Tong, X., Uchifune, T., Walz, M.G., Wiegmann, B.M., Wilbrandt, J., Wipfler, B., Wong, T.K.F., Wu, Q., Wu, G., Xie, Y., Yang, S., Yang, Q., Yeates, D.K., Yoshizawa, K., Zhang, Q., Zhang, R., Zhang, W., Zhang, Y., Zhao, J., Zhou, C., Zhou, L., Ziesmann, T., Zou, S., Li, Y., Xu, X., Zhang, Y., Yang, H., Wang, J., Wang, J., Kjer, K.M., Zhou, X., 2014. Phylogenomics resolves the timing and pattern of insect evolution. *Science* 346, 763–767.
- Ober, K.A., 2002. Phylogenetic relationships of the carabid subfamily Harpalinae (Coleoptera) based on molecular sequence data. *Mol. Phylogenet. Evol.* 24, 228–248.
- Ober, K.A., Heider, T.N., 2010. Phylogenetic diversification patterns and divergence times in ground beetles (Coleoptera: Carabidae: Harpalinae). *BMC Evol. Biol.* 10, 262.
- Pons, J., Barraclough, T., Theodorides, K., Cardoso, A., Vogler, A., 2004. Using exon and intron sequences of the gene *Mp20* to resolve basal relationships in *Cicindela* (Coleoptera: Cicindelidae). *Syst. Biol.* 53, 554–570.
- Ribera, I., Vogler, A. P. and Balke, M. 2008, Phylogeny and diversification of diving beetles (Coleoptera: Dytiscidae). *Cladistics*, 24: 563–590.
- Shull, V.L., Vogler, A.P., Baker, M.D., Maddison, D.R., Hammond, P.M., 2001. Sequence alignment of 18S ribosomal RNA and the basal relationships of Adephegan beetles: evidence for monophyly of aquatic families and the placement of Trachypachidae. *Syst. Biol.* 50, 945–969.
- Sota, T., Ishikawa, R., Ujiie, M., Kusumoto, F., Vogler, A.P., 2001. Extensive trans-species



- mitochondrial polymorphisms in the carabid beetles *Carabus* subgenus *Ohomopterus* caused by repeated introgressive hybridization. *Mol. Ecol.* 10, 2833–2847.
- Sota, T., Liang, H., Enokido, Y., Hori, M., 2011. Phylogeny and divergence time of island tiger beetles of the genus *Cylindera* (Coleoptera: Cicindelidae) in East Asia. *Biol. J. Linn. Soc. Lond.* 102, 715–727.
- Timmermans, M.J.T.N., Barton, C., Haran, J., Ahrens, D., Culverwell, C.L., Ollikainen, A., Dodsworth, S., Foster, P.G., Bocak, L., Vogler, A.P., 2016. Family-Level Sampling of Mitochondrial Genomes in Coleoptera: Compositional Heterogeneity and Phylogenetics. *Genome Biol. Evol.* 8, 161–175.
- Vogler, A., Cardoso, A., Barraclough, T., 2005. Exploring Rate Variation Among and Within Sites in a Densely Sampled Tree: Species Level Phylogenetics of North American Tiger Beetles (Genus *Cicindela* ). *Syst. Biol.* 54, 4–20.
- Vogler, A.P., Pearson, D.L., 1996. A molecular phylogeny of the tiger beetles (Cicindelidae): congruence of mitochondrial and nuclear rDNA data sets. *Mol. Phylogenet. Evol.* 6, 321–338.
